# Supplementary material for: Cleavage of an aromatic ring and radical migration
Source: Royal Society of Chemistry journal article supplement (doi:10.1039/d2fd00012a), 2022-01-01
Supplement: d2fd00012a1.pdf [file d2fd00012a1.pdf]

**Electronic Supplementary Information**  
**for**  
**Cleavage of an aromatic ring and radical migration**

**Alexander M. Mebel<sup>a,\*</sup> and Michael Frenklach<sup>b,\*</sup>**

*<sup>a</sup>Department of Chemistry and Biochemistry, Florida International University, Miami,  
Florida, 33199, USA. E-mail: [mebela@fiu.edu](mailto:mebela@fiu.edu)*

*<sup>b</sup>Department of Mechanical Engineering, University of California at Berkeley, Berkeley,  
California, 94720-1740, USA. E-mail: [frenklach@berkeley.edu](mailto:frenklach@berkeley.edu)*

**Table S1.** Calculated rate constants ( $s^{-1}$ ) for unimolecular isomerization and decomposition reactions of naphthalenyl ( $C_{10}H_7$ , (a)), acetanaphthylenyl ( $C_{12}H_7$ , (b)), and pyrenyl ( $C_{16}H_9$ , (c)) radicals at pressures of 30 Torr, 1, 10, and 100 atm.

a) naphthalenyl radicals,  $C_{10}H_7$

| Pressure = 30 Torr |                |                |                |                |              |
|--------------------|----------------|----------------|----------------|----------------|--------------|
| T(K)               | <b>n1→n-p1</b> | <b>n1→n-p2</b> | <b>n1→n-p3</b> | <b>n1→n-p4</b> | <b>n1→n2</b> |
| 500                | 1.06E-27       | 1.44E-26       | 2.53E-20       | 1.02E-24       | 8.74E-13     |
| 600                | 3.68E-20       | 2.39E-19       | 1.57E-14       | 5.26E-18       | 1.36E-08     |
| 700                | 8.63E-15       | 3.49E-14       | 2.20E-10       | 4.63E-13       | 1.58E-05     |
| 800                | 8.48E-11       | 2.45E-10       | 2.89E-07       | 2.78E-09       | 3.36E-03     |
| 900                | 9.94E-08       | 2.21E-07       | 7.71E-05       | 2.45E-06       | 2.22E-01     |
| 1000               | 2.62E-05       | 4.72E-05       | 6.74E-03       | 5.19E-04       | 6.35E+00     |
| 1125               | 6.15E-03       | 9.10E-03       | 5.78E-01       | 9.30E-02       | 1.70E+02     |
| 1250               | 4.08E-01       | 5.28E-01       | 1.90E+01       | 4.73E+00       | 2.06E+03     |
| 1375               | 1.01E+01       | 1.20E+01       | 2.90E+02       | 9.19E+01       | 1.30E+04     |
| 1500               | 1.27E+02       | 1.41E+02       | 2.55E+03       | 9.32E+02       | 5.12E+04     |
| 1650               | 1.17E+03       | 1.23E+03       | 1.73E+04       | 6.88E+03       | 1.58E+05     |
| 1800               | 5.60E+03       | 5.73E+03       | 6.64E+04       | 2.77E+04       | 3.37E+05     |
| 2000               | ***            | ***            | ***            | ***            | ***          |
| 2250               | ***            | ***            | ***            | ***            | ***          |
| 2500               | ***            | ***            | ***            | ***            | ***          |
|                    |                |                |                |                |              |
| Pressure = 1 atm   |                |                |                |                |              |
| T(K)               | <b>n1→n-p1</b> | <b>n1→n-p2</b> | <b>n1→n-p3</b> | <b>n1→n-p4</b> | <b>n1→n2</b> |
| 500                | 4.16E-28       | 6.99E-27       | 2.53E-20       | 4.03E-26       | 8.74E-13     |
| 600                | 1.33E-20       | 9.15E-20       | 1.57E-14       | 2.12E-19       | 1.36E-08     |
| 700                | 3.68E-15       | 1.36E-14       | 2.22E-10       | 1.99E-14       | 1.59E-05     |
| 800                | 4.98E-11       | 1.21E-10       | 2.92E-07       | 1.38E-10       | 3.37E-03     |
| 900                | 8.32E-08       | 1.54E-07       | 7.84E-05       | 1.59E-07       | 2.25E-01     |
| 1000               | 3.03E-05       | 4.65E-05       | 6.89E-03       | 4.88E-05       | 6.60E+00     |
| 1125               | 9.97E-03       | 1.30E-02       | 6.04E-01       | 1.53E-02       | 1.95E+02     |
| 1250               | 9.03E-01       | 1.04E+00       | 2.14E+01       | 1.42E+00       | 2.88E+03     |
| 1375               | 3.14E+01       | 3.28E+01       | 3.85E+02       | 5.07E+01       | 2.45E+04     |
| 1500               | 5.16E+02       | 5.03E+02       | 4.01E+03       | 8.33E+02       | 1.32E+05     |
| 1650               | 6.68E+03       | 6.13E+03       | 3.58E+04       | 1.03E+04       | 5.95E+05     |
| 1800               | 5.42E+04       | 4.76E+04       | 2.19E+05       | 7.72E+04       | 1.87E+06     |
| 2000               | 3.63E+05       | 3.06E+05       | 1.12E+06       | 4.53E+05       | 4.97E+06     |
| 2250               | ***            | ***            | ***            | ***            | ***          |
| 2500               | ***            | ***            | ***            | ***            | ***          |
|                    |                |                |                |                |              |
| Pressure = 10 atm  |                |                |                |                |              |
| T(K)               | <b>n1→n-p1</b> | <b>n1→n-p2</b> | <b>n1→n-p3</b> | <b>n1→n-p4</b> | <b>n1→n2</b> |

|                    |                |                |                |                |              |
|--------------------|----------------|----------------|----------------|----------------|--------------|
| 500                | 3.70E-28       | 6.56E-27       | 2.53E-20       | 4.03E-27       | 8.74E-13     |
| 600                | 1.03E-20       | 7.81E-20       | 1.57E-14       | 2.13E-20       | 1.36E-08     |
| 700                | 2.36E-15       | 9.76E-15       | 2.22E-10       | 2.00E-15       | 1.59E-05     |
| 800                | 2.68E-11       | 7.14E-11       | 2.92E-07       | 1.42E-11       | 3.37E-03     |
| 900                | 4.20E-08       | 8.01E-08       | 7.88E-05       | 1.69E-08       | 2.25E-01     |
| 1000               | 1.63E-05       | 2.44E-05       | 6.97E-03       | 5.62E-06       | 6.63E+00     |
| 1125               | 6.64E-03       | 8.07E-03       | 6.16E-01       | 2.09E-03       | 1.98E+02     |
| 1250               | 7.95E-01       | 8.44E-01       | 2.21E+01       | 2.51E-01       | 3.02E+03     |
| 1375               | 3.67E+01       | 3.55E+01       | 4.08E+02       | 1.25E+01       | 2.79E+04     |
| 1500               | 7.97E+02       | 7.20E+02       | 4.54E+03       | 3.01E+02       | 1.72E+05     |
| 1650               | 1.45E+04       | 1.23E+04       | 4.77E+04       | 6.19E+03       | 9.82E+05     |
| 1800               | 1.32E+05       | 1.07E+05       | 3.04E+05       | 6.09E+04       | 3.70E+06     |
| 2000               | 1.42E+06       | 1.12E+06       | 2.26E+06       | 6.55E+05       | 1.39E+07     |
| 2250               | 8.69E+06       | 6.60E+06       | 1.10E+07       | 3.92E+06       | 3.80E+07     |
| 2500               | ***            | ***            | ***            | ***            | ***          |
|                    |                |                |                |                |              |
| Pressure = 100 atm |                |                |                |                |              |
| T(K)               | <b>n1→n-p1</b> | <b>n1→n-p2</b> | <b>n1→n-p3</b> | <b>n1→n-p4</b> | <b>n1→n2</b> |
| 500                | 3.52E-28       | 6.15E-27       | 2.53E-20       | 4.03E-28       | 8.74E-13     |
| 600                | 9.79E-21       | 7.41E-20       | 1.57E-14       | 2.13E-21       | 1.36E-08     |
| 700                | 2.16E-15       | 9.16E-15       | 2.22E-10       | 2.00E-16       | 1.59E-05     |
| 800                | 2.27E-11       | 6.31E-11       | 2.92E-07       | 1.42E-12       | 3.37E-03     |
| 900                | 3.13E-08       | 6.35E-08       | 7.88E-05       | 1.71E-09       | 2.25E-01     |
| 1000               | 1.05E-05       | 1.67E-05       | 6.98E-03       | 5.79E-07       | 6.63E+00     |
| 1125               | 3.71E-03       | 4.69E-03       | 6.21E-01       | 2.26E-04       | 1.99E+02     |
| 1250               | 4.32E-01       | 4.61E-01       | 2.25E+01       | 2.99E-02       | 3.05E+03     |
| 1375               | 2.21E+01       | 2.08E+01       | 4.23E+02       | 1.74E+00       | 2.87E+04     |
| 1500               | 5.85E+02       | 5.07E+02       | 4.83E+03       | 5.23E+01       | 1.86E+05     |
| 1650               | 1.45E+04       | 1.17E+04       | 5.39E+04       | 1.53E+03       | 1.18E+06     |
| 1800               | 1.85E+05       | 1.42E+05       | 3.87E+05       | 2.32E+04       | 5.27E+06     |
| 2000               | 2.37E+06       | 1.75E+06       | 3.06E+06       | 3.68E+05       | 2.45E+07     |
| 2250               | 2.05E+07       | 1.47E+07       | 1.91E+07       | 3.69E+06       | 9.10E+07     |
| 2500               | 1.33E+08       | 9.40E+07       | 8.07E+07       | 2.18E+07       | 2.21E+08     |
|                    |                |                |                |                |              |
| Pressure = 30 Torr |                |                |                |                |              |
| T(K)               | <b>n2→n-p1</b> | <b>n2→n-p2</b> | <b>n2→n-p3</b> | <b>n2→n-p4</b> | <b>n2→n1</b> |
| 500                | 1.03E-29       | 6.63E-29       | 2.13E-20       | 3.83E-21       | 7.26E-13     |
| 600                | 1.13E-21       | 4.05E-21       | 1.36E-14       | 3.67E-15       | 1.17E-08     |
| 700                | 7.04E-16       | 1.76E-15       | 1.96E-10       | 7.04E-11       | 1.38E-05     |
| 800                | 1.51E-11       | 2.97E-11       | 2.62E-07       | 1.15E-07       | 2.96E-03     |
| 900                | 3.18E-08       | 5.29E-08       | 7.12E-05       | 3.55E-05       | 1.98E-01     |
| 1000               | 1.26E-05       | 1.86E-05       | 6.31E-03       | 3.33E-03       | 5.69E+00     |
| 1125               | 4.06E-03       | 5.33E-03       | 5.47E-01       | 2.87E-01       | 1.54E+02     |

|                   |                |                |                |                |              |
|-------------------|----------------|----------------|----------------|----------------|--------------|
| 1250              | 3.21E-01       | 3.88E-01       | 1.82E+01       | 9.13E+00       | 1.87E+03     |
| 1375              | 8.89E+00       | 1.01E+01       | 2.84E+02       | 1.36E+02       | 1.19E+04     |
| 1500              | 1.11E+02       | 1.21E+02       | 2.40E+03       | 1.12E+03       | 4.74E+04     |
| 1650              | 1.03E+03       | 1.08E+03       | 1.60E+04       | 7.46E+03       | 1.48E+05     |
| 1800              | 5.02E+03       | 5.09E+03       | 6.16E+04       | 2.88E+04       | 3.23E+05     |
| 2000              | 2.28E+04       | 2.25E+04       | 2.18E+05       | 9.90E+04       | ***          |
| 2250              | ***            | ***            | ***            | ***            | ***          |
| 2500              | ***            | ***            | ***            | ***            | ***          |
|                   |                |                |                |                |              |
| Pressure = 1 atm  |                |                |                |                |              |
| T(K)              | <b>n2→n-p1</b> | <b>n2→n-p2</b> | <b>n2→n-p3</b> | <b>n2→n-p4</b> | <b>n2→n1</b> |
| 500               | 1.68E-31       | 1.20E-30       | 2.13E-20       | 3.83E-21       | 7.26E-13     |
| 600               | 1.99E-23       | 6.76E-23       | 1.36E-14       | 3.68E-15       | 1.17E-08     |
| 700               | 1.86E-17       | 3.96E-17       | 1.96E-10       | 7.08E-11       | 1.38E-05     |
| 800               | 7.17E-13       | 1.15E-12       | 2.62E-07       | 1.17E-07       | 2.97E-03     |
| 900               | 2.88E-09       | 3.87E-09       | 7.13E-05       | 3.77E-05       | 2.00E-01     |
| 1000              | 2.17E-06       | 2.58E-06       | 6.35E-03       | 3.81E-03       | 5.93E+00     |
| 1125              | 1.48E-03       | 1.58E-03       | 5.66E-01       | 3.77E-01       | 1.76E+02     |
| 1250              | 2.32E-01       | 2.30E-01       | 2.03E+01       | 1.43E+01       | 2.61E+03     |
| 1375              | 1.20E+01       | 1.13E+01       | 3.70E+02       | 2.61E+02       | 2.24E+04     |
| 1500              | 2.65E+02       | 2.40E+02       | 3.92E+03       | 2.67E+03       | 1.21E+05     |
| 1650              | 4.47E+03       | 3.90E+03       | 3.68E+04       | 2.38E+04       | 5.52E+05     |
| 1800              | 3.64E+04       | 3.08E+04       | 2.03E+05       | 1.26E+05       | 1.78E+06     |
| 2000              | 2.53E+05       | 2.09E+05       | 1.02E+06       | 6.20E+05       | 4.94E+06     |
| 2250              | 1.44E+06       | 1.17E+06       | 3.93E+06       | 2.04E+06       | ***          |
| 2500              | ***            | ***            | ***            | ***            | ***          |
|                   |                |                |                |                |              |
| Pressure = 10 atm |                |                |                |                |              |
| T(K)              | <b>n2→n-p1</b> | <b>n2→n-p2</b> | <b>n2→n-p3</b> | <b>n2→n-p4</b> | <b>n2→n1</b> |
| 500               | 1.41E-32       | 1.05E-31       | 2.13E-20       | 3.83E-21       | 7.26E-13     |
| 600               | 1.42E-24       | 5.17E-24       | 1.36E-14       | 3.68E-15       | 1.17E-08     |
| 700               | 1.10E-18       | 2.48E-18       | 1.96E-10       | 7.08E-11       | 1.38E-05     |
| 800               | 3.96E-14       | 6.43E-14       | 2.62E-07       | 1.18E-07       | 2.97E-03     |
| 900               | 1.78E-10       | 2.30E-10       | 7.13E-05       | 3.78E-05       | 2.01E-01     |
| 1000              | 1.74E-07       | 1.93E-07       | 6.35E-03       | 3.85E-03       | 5.95E+00     |
| 1125              | 1.84E-04       | 1.80E-04       | 5.67E-01       | 3.91E-01       | 1.79E+02     |
| 1250              | 4.69E-02       | 4.24E-02       | 2.06E+01       | 1.57E+01       | 2.75E+03     |
| 1375              | 3.96E+00       | 3.38E+00       | 3.87E+02       | 3.14E+02       | 2.54E+04     |
| 1500              | 1.39E+02       | 1.14E+02       | 4.38E+03       | 3.67E+03       | 1.58E+05     |
| 1650              | 3.96E+03       | 3.15E+03       | 4.75E+04       | 3.98E+04       | 9.04E+05     |
| 1800              | 5.07E+04       | 3.93E+04       | 3.17E+05       | 2.60E+05       | 3.43E+06     |
| 2000              | 5.99E+05       | 4.53E+05       | 2.15E+06       | 1.71E+06       | 1.36E+07     |
| 2250              | 4.33E+06       | 3.19E+06       | 1.09E+07       | 8.52E+06       | 3.87E+07     |

|                    |                |                |                |                |              |
|--------------------|----------------|----------------|----------------|----------------|--------------|
| 2500               | 2.28E+07       | 1.68E+07       | 3.16E+07       | 1.87E+07       | ***          |
|                    |                |                |                |                |              |
| Pressure = 100 atm |                |                |                |                |              |
| T(K)               | <b>n2→n-p1</b> | <b>n2→n-p2</b> | <b>n2→n-p3</b> | <b>n2→n-p4</b> | <b>n2→n1</b> |
| 500                | 1.01E-33       | 7.40E-33       | 2.13E-20       | 3.83E-21       | 7.26E-13     |
| 600                | 1.09E-25       | 3.99E-25       | 1.36E-14       | 3.68E-15       | 1.17E-08     |
| 700                | 8.42E-20       | 1.94E-19       | 1.96E-10       | 7.08E-11       | 1.38E-05     |
| 800                | 2.82E-15       | 4.73E-15       | 2.62E-07       | 1.18E-07       | 2.97E-03     |
| 900                | 1.14E-11       | 1.52E-11       | 7.13E-05       | 3.78E-05       | 2.01E-01     |
| 1000               | 1.03E-08       | 1.16E-08       | 6.35E-03       | 3.85E-03       | 5.95E+00     |
| 1125               | 1.12E-05       | 1.08E-05       | 5.67E-01       | 3.93E-01       | 1.80E+02     |
| 1250               | 3.47E-03       | 3.03E-03       | 2.06E+01       | 1.59E+01       | 2.77E+03     |
| 1375               | 4.02E-01       | 3.27E-01       | 3.89E+02       | 3.27E+02       | 2.62E+04     |
| 1500               | 2.08E+01       | 1.61E+01       | 4.49E+03       | 4.03E+03       | 1.70E+05     |
| 1650               | 9.83E+02       | 7.36E+02       | 5.12E+04       | 4.86E+04       | 1.08E+06     |
| 1800               | 2.10E+04       | 1.53E+04       | 3.81E+05       | 3.72E+05       | 4.86E+06     |
| 2000               | 4.58E+05       | 3.26E+05       | 3.22E+06       | 3.17E+06       | 2.27E+07     |
| 2250               | 6.27E+06       | 4.38E+06       | 2.28E+07       | 2.24E+07       | 8.55E+07     |
| 2500               | 3.49E+07       | 2.40E+07       | 8.89E+07       | 8.73E+07       | 2.36E+08     |

b) acetanaphthylenyl radicals, C<sub>12</sub>H<sub>7</sub>

|                    |                |                |                |                |                  |
|--------------------|----------------|----------------|----------------|----------------|------------------|
| Pressure = 30 Torr |                |                |                |                |                  |
| T(K)               | <b>an1→an3</b> | <b>an1→an4</b> | <b>an1→an5</b> | <b>an1→an7</b> | <b>an1→an-p1</b> |
| 500                | 3.34E-13       | 4.32E-17       | 5.56E-19       | 1.37E-22       | 9.81E-37         |
| 700                | 2.91E-17       | 1.80E-18       | 2.49E-19       | 4.69E-12       | 1.20E-23         |
| 800                | 5.48E-13       | 9.07E-14       | 3.14E-14       | 1.09E-08       | 2.52E-18         |
| 900                | 1.32E-09       | 4.41E-10       | 2.14E-10       | 4.75E-06       | 3.80E-14         |
| 1000               | 8.47E-07       | 4.14E-07       | 2.29E-08       | 6.22E-04       | 8.33E-11         |
| 1125               | 3.49E-04       | 2.68E-04       | 1.77E-04       | 7.98E-02       | 1.75E-07         |
| 1250               | 4.51E-02       | 4.21E-02       | 2.94E-02       | 3.53E+00       | 7.54E-05         |
| 1375               | 2.01E+00       | 2.08E+00       | 1.50E+00       | 6.62E+01       | 9.96E-03         |
| 1500               | 3.85E+01       | 4.21E+01       | 3.09E+01       | 6.24E+02       | 5.16E-01         |
| 1650               | 5.50E+02       | 6.16E+02       | 4.61E+02       | 4.62E+03       | 2.15E+01         |
| 1750               | 2.10E+03       | 2.36E+03       | 1.79E+03       | 1.28E+04       | 1.53E+02         |
| 1800               | 3.67E+03       | 7.30E+03       | ***            | 1.98E+04       | 3.57E+02         |
| 2000               | ***            | 8.14E+04       | ***            | ***            | 7.00E+03         |
| 2250               | ***            | 2.76E+05       | ***            | ***            | 6.87E+04         |
| 2500               | ***            | ***            | ***            | ***            | ***              |
|                    |                |                |                |                |                  |
| Pressure = 1 atm   |                |                |                |                |                  |
| T(K)               | <b>an1→an3</b> | <b>an1→an4</b> | <b>an1→an5</b> | <b>an1→an7</b> | <b>an1→an-p1</b> |
| 500                | 5.18E-13       | -2.39E-16      | 7.30E-15       | 1.34E-22       | 4.41E-37         |

|                    |                |                |                |                |                  |
|--------------------|----------------|----------------|----------------|----------------|------------------|
| 600                | 1.55E-10       | 8.41E-15       | 4.66E-15       | 1.69E-16       | -7.78E-31        |
| 900                | 1.21E-10       | 3.94E-12       | 4.43E-13       | 4.76E-06       | 2.19E-15         |
| 1000               | 6.64E-08       | 5.75E-09       | 1.20E-09       | 6.31E-04       | 6.58E-12         |
| 1125               | 4.34E-05       | 8.72E-06       | 2.93E-06       | 8.50E-02       | 2.14E-08         |
| 1250               | 8.00E-03       | 2.84E-03       | 1.31E-03       | 4.31E+00       | 1.37E-05         |
| 1375               | 5.37E-01       | 2.84E-01       | 1.58E-01       | 1.04E+02       | 2.59E-03         |
| 1500               | 1.60E+01       | 1.12E+01       | 7.00E+00       | 1.37E+03       | 1.90E-01         |
| 1650               | 3.96E+02       | 3.44E+02       | 2.35E+02       | 1.57E+04       | 1.25E+01         |
| 1750               | 2.18E+03       | 2.08E+03       | 1.47E+03       | 5.67E+04       | 1.26E+02         |
| 1800               | 4.60E+03       | 4.51E+03       | 3.24E+03       | 9.92E+04       | 3.52E+02         |
| 2000               | 4.80E+04       | 5.03E+04       | 3.76E+04       | 5.85E+05       | 1.02E+04         |
| 2250               | ***            | 1.43E+06       | ***            | ***            | 2.53E+05         |
| 2500               | ***            | 4.00E+06       | ***            | ***            | 1.70E+06         |
|                    |                |                |                |                |                  |
| Pressure = 10 atm  |                |                |                |                |                  |
| T(K)               | <b>an1→an3</b> | <b>an1→an4</b> | <b>an1→an5</b> | <b>an1→an7</b> | <b>an1→an-p1</b> |
| 500                | 4.96E-14       | 8.39E-13       | 1.20E-13       | 7.28E-23       | 2.90E-36         |
| 1125               | 8.70E-06       | 2.80E-07       | 2.67E-08       | 8.54E-02       | 2.64E-09         |
| 1250               | 1.56E-03       | 1.35E-04       | 2.46E-05       | 4.38E+00       | 2.09E-06         |
| 1375               | 1.23E-01       | 2.12E-02       | 5.90E-03       | 1.10E+02       | 5.12E-04         |
| 1500               | 4.69E+00       | 1.34E+00       | 5.04E-01       | 1.60E+03       | 4.91E-02         |
| 1650               | 1.63E+02       | 7.23E+01       | 3.51E+01       | 2.22E+04       | 4.38E+00         |
| 1750               | 1.13E+03       | 6.29E+02       | 3.44E+02       | 9.48E+04       | 5.38E+01         |
| 1800               | 2.66E+03       | 1.63E+03       | 9.36E+02       | 1.81E+05       | 1.66E+02         |
| 2000               | 4.37E+04       | 3.50E+04       | 2.30E+04       | 1.50E+06       | 7.38E+03         |
| 2250               | 4.66E+05       | 4.31E+05       | 3.07E+05       | 9.21E+06       | 2.22E+05         |
| 2500               | ***            | 1.04E+07       | ***            | ***            | 3.36E+06         |
|                    |                |                |                |                |                  |
| Pressure = 100 atm |                |                |                |                |                  |
| T(K)               | <b>an1→an3</b> | <b>an1→an4</b> | <b>an1→an5</b> | <b>an1→an7</b> | <b>an1→an-p1</b> |
| 500                | 7.24E-14       | 1.93E-12       | 6.18E-13       | 1.38E-23       | -2.93E-36        |
| 1000               | 2.13E-07       | 2.64E-08       | 2.03E-08       | 4.72E-04       | 6.65E-14         |
| 1125               | 3.81E-06       | 1.04E-08       | 1.67E-09       | 7.13E-02       | 2.49E-10         |
| 1250               | 4.00E-04       | 2.98E-06       | 7.18E-08       | 3.73E+00       | 1.80E-07         |
| 1375               | 2.79E-02       | 6.80E-04       | 4.15E-05       | 1.11E+02       | 6.11E-05         |
| 1500               | 9.85E-01       | 5.69E-02       | 6.48E-03       | 1.65E+03       | 6.87E-03         |
| 1650               | 3.89E+01       | 4.83E+00       | 9.27E-01       | 2.42E+04       | 7.86E-01         |
| 1750               | 3.19E+02       | 5.88E+01       | 1.47E+01       | 1.11E+05       | 1.16E+01         |
| 1800               | 8.30E+02       | 1.81E+02       | 5.08E+01       | 2.22E+05       | 3.95E+01         |
| 2000               | 2.08E+04       | 7.74E+03       | 3.12E+03       | 2.35E+06       | 2.60E+03         |
| 2250               | 3.69E+05       | 2.10E+05       | 1.12E+05       | 2.05E+07       | 1.30E+05         |
| 2500               | 2.52E+06       | 1.79E+06       | 1.10E+06       | 9.24E+07       | 2.12E+06         |
|                    |                |                |                |                |                  |

| Pressure = 30 Torr |          |          |          |          |           |
|--------------------|----------|----------|----------|----------|-----------|
| T(K)               | an3→an1  | an3→an4  | an3→an5  | an3→an7  | an3→an-p1 |
| 700                | 1.72E-18 | 5.12E-06 | 3.52E-10 | 6.22E-14 | 4.30E-21  |
| 800                | 4.60E-14 | 1.26E-03 | 8.17E-07 | 2.01E-10 | 2.12E-16  |
| 900                | 1.46E-10 | 9.70E-02 | 3.77E-04 | 1.07E-07 | 8.86E-13  |
| 1000               | 7.51E-07 | 3.17E+00 | 4.91E-02 | 1.56E-05 | 6.81E-10  |
| 1125               | 6.75E-05 | 9.85E+01 | 5.26E+00 | 2.03E-03 | 5.42E-07  |
| 1250               | 9.25E-03 | 1.34E+03 | 1.65E+02 | 8.58E-02 | 1.19E-04  |
| 1375               | 4.74E-01 | 9.26E+03 | 1.98E+03 | 1.57E+00 | 9.99E-03  |
| 1500               | 1.03E+01 | 3.79E+04 | 1.15E+04 | 1.55E+01 | 3.87E-01  |
| 1650               | 1.67E+02 | 1.25E+05 | 4.92E+04 | 1.37E+02 | 1.36E+01  |
| 1750               | 6.93E+02 | 2.26E+05 | 9.89E+04 | 4.61E+02 | 9.58E+01  |
| 1800               | 1.26E+03 | 4.13E+05 | ***      | 7.95E+02 | 2.24E+02  |
| 2000               | ***      | ***      | ***      | ***      | ***       |
| 2250               | ***      | ***      | ***      | ***      | ***       |
| 2500               | ***      | ***      | ***      | ***      | ***       |
|                    |          |          |          |          |           |
| Pressure = 1 atm   |          |          |          |          |           |
| T(K)               | an3→an1  | an3→an4  | an3→an5  | an3→an7  | an3→an-p1 |
| 500                | 9.39E-26 | 3.26E-13 | 1.17E-21 | 4.61E-25 | 3.27E-36  |
| 700                | 9.64E-18 | 5.12E-06 | 1.41E-11 | 6.25E-14 | 5.14E-21  |
| 800                | 8.29E-15 | 1.26E-03 | 3.42E-08 | 2.04E-10 | 2.98E-16  |
| 900                | 1.34E-11 | 9.77E-02 | 1.83E-05 | 1.14E-07 | 1.49E-12  |
| 1000               | 9.14E-09 | 3.28E+00 | 3.18E-03 | 1.81E-05 | 1.32E-09  |
| 1125               | 1.97E-05 | 1.12E+02 | 5.92E-01 | 2.85E-03 | 1.08E-06  |
| 1250               | 1.68E-03 | 1.87E+03 | 3.68E+01 | 1.56E-01 | 2.15E-04  |
| 1375               | 1.27E-01 | 1.77E+04 | 9.30E+02 | 3.80E+00 | 1.54E-02  |
| 1500               | 4.27E+00 | 1.04E+05 | 1.11E+04 | 4.87E+01 | 5.41E-01  |
| 1650               | 1.20E+02 | 5.16E+05 | 9.82E+04 | 5.37E+02 | 1.92E+01  |
| 1750               | 7.15E+02 | 1.17E+06 | 2.87E+05 | 1.97E+03 | 1.47E+02  |
| 1800               | 1.56E+03 | 1.65E+06 | 4.50E+05 | 3.53E+03 | 3.71E+02  |
| 2000               | 1.91E+04 | 4.88E+06 | 1.76E+06 | 2.55E+04 | 8.58E+03  |
| 2250               | ***      | ***      | ***      | ***      | ***       |
| 2500               | ***      | ***      | ***      | ***      | ***       |
|                    |          |          |          |          |           |
| Pressure = 10 atm  |          |          |          |          |           |
| T(K)               | an3→an1  | an3→an4  | an3→an5  | an3→an7  | an3→an-p1 |
| 500                | 2.80E-25 | 3.26E-13 | 1.17E-22 | 4.61E-25 | 3.27E-36  |
| 700                | 1.28E-17 | 5.12E-06 | 1.41E-12 | 6.25E-14 | 5.19E-21  |
| 800                | 6.48E-15 | 1.26E-03 | 3.44E-09 | 2.05E-10 | 3.06E-16  |
| 900                | 5.59E-12 | 9.77E-02 | 1.86E-06 | 1.14E-07 | 1.59E-12  |
| 1000               | 2.39E-09 | 3.28E+00 | 3.35E-04 | 1.82E-05 | 1.49E-09  |
| 1125               | 1.49E-06 | 1.13E+02 | 7.00E-02 | 2.96E-03 | 1.38E-06  |

|                    |                |                |                |                |                  |
|--------------------|----------------|----------------|----------------|----------------|------------------|
| 1250               | 2.87E-04       | 1.95E+03       | 5.50E+00       | 1.74E-01       | 3.16E-04         |
| 1375               | 2.90E-02       | 2.01E+04       | 1.97E+02       | 4.77E+00       | 2.54E-02         |
| 1500               | 1.25E+00       | 1.36E+05       | 3.62E+03       | 7.25E+01       | 9.26E-01         |
| 1650               | 4.94E+01       | 8.60E+05       | 5.64E+04       | 1.01E+03       | 3.13E+01         |
| 1750               | 3.71E+02       | 2.31E+06       | 2.38E+05       | 4.25E+03       | 2.28E+02         |
| 1800               | 9.07E+02       | 3.56E+06       | 4.41E+05       | 8.06E+03       | 5.62E+02         |
| 2000               | 1.72E+04       | 1.42E+07       | 2.99E+06       | 6.78E+04       | 1.30E+04         |
| 2250               | 2.25E+05       | 4.51E+07       | 1.37E+07       | 4.91E+05       | 2.70E+05         |
| 2500               | ***            | ***            | ***            | ***            | ***              |
|                    |                |                |                |                |                  |
| Pressure = 100 atm |                |                |                |                |                  |
| T(K)               | <b>an3→an1</b> | <b>an3→an4</b> | <b>an3→an5</b> | <b>an3→an7</b> | <b>an3→an-p1</b> |
| 500                | 5.97E-26       | 3.26E-13       | 1.17E-23       | 2.96E-25       | 3.27E-36         |
| 600                | 1.95E-20       | 4.05E-09       | 6.61E-18       | 1.37E-18       | 2.34E-27         |
| 700                | 6.61E-17       | 5.12E-06       | 1.41E-13       | 6.25E-14       | 5.19E-21         |
| 800                | 6.97E-15       | 1.26E-03       | 3.44E-10       | 2.05E-10       | 3.07E-16         |
| 900                | 4.68E-12       | 9.77E-02       | 1.86E-07       | 1.14E-07       | 1.60E-12         |
| 1000               | 1.72E-09       | 3.28E+00       | 3.37E-05       | 1.83E-05       | 1.52E-09         |
| 1125               | 6.58E-07       | 1.13E+02       | 7.19E-03       | 2.97E-03       | 1.45E-06         |
| 1250               | 8.38E-05       | 1.97E+03       | 5.97E-01       | 1.77E-01       | 3.49E-04         |
| 1375               | 6.50E-03       | 2.05E+04       | 2.41E+01       | 5.00E+00       | 3.07E-02         |
| 1500               | 2.63E-01       | 1.45E+05       | 5.48E+02       | 8.09E+01       | 1.25E+00         |
| 1650               | 1.18E+01       | 1.02E+06       | 1.23E+04       | 1.28E+03       | 4.87E+01         |
| 1750               | 1.05E+02       | 3.05E+06       | 7.02E+04       | 6.07E+03       | 3.81E+02         |
| 1800               | 2.84E+02       | 5.00E+06       | 1.53E+05       | 1.23E+04       | 9.67E+02         |
| 2000               | 8.23E+03       | 2.63E+07       | 1.97E+06       | 1.33E+05       | 2.33E+04         |
| 2250               | 1.76E+05       | 1.16E+08       | 1.75E+07       | 1.20E+06       | 4.90E+05         |
| 2500               | 1.49E+06       | 3.19E+08       | 7.18E+07       | 5.95E+06       | 4.95E+06         |
|                    |                |                |                |                |                  |
| Pressure = 30 Torr |                |                |                |                |                  |
| T(K)               | <b>an4→an1</b> | <b>an4→an3</b> | <b>an4→an5</b> | <b>an4→an7</b> | <b>an4→an-p1</b> |
| 700                | 8.67E-20       | 4.35E-06       | 2.65E-05       | 2.14E-16       | 5.92E-22         |
| 800                | 6.52E-15       | 1.08E-03       | 5.19E-03       | 2.84E-12       | 5.64E-17         |
| 900                | 4.19E-11       | 8.34E-02       | 3.25E-01       | 4.64E-09       | 3.94E-13         |
| 1125               | 3.69E-05       | 8.53E+01       | 2.28E+02       | 4.59E-04       | 4.60E-07         |
| 1250               | 7.44E-03       | 1.16E+03       | 2.62E+03       | 3.39E-02       | 1.14E-04         |
| 1375               | 4.29E-01       | 8.05E+03       | 1.56E+04       | 9.02E-01       | 9.91E-03         |
| 1500               | 9.80E+00       | 3.29E+04       | 5.56E+04       | 1.13E+01       | 3.88E-01         |
| 1650               | 1.64E+02       | 1.09E+05       | 1.62E+05       | 1.17E+02       | 1.36E+01         |
| 1750               | 6.82E+02       | 1.97E+05       | 2.77E+05       | 4.16E+02       | 9.50E+01         |
| 1800               | 1.29E+03       | 2.09E+05       | ***            | 7.49E+02       | 2.35E+02         |
| 2000               | 1.18E+04       | ***            | ***            | ***            | 3.88E+03         |
| 2250               | 5.20E+04       | ***            | ***            | ***            | 3.94E+04         |



|                    |                |                |                |                |                  |
|--------------------|----------------|----------------|----------------|----------------|------------------|
| 2500               | ***            | ***            | ***            | ***            | 1.88E+05         |
|                    |                |                |                |                |                  |
| Pressure = 1 atm   |                |                |                |                |                  |
| T(K)               | <b>an4→an1</b> | <b>an4→an3</b> | <b>an4→an5</b> | <b>an4→an7</b> | <b>an4→an-p1</b> |
| 500                | 6.86E-25       | 2.70E-13       | 1.96E-12       | 1.67E-30       | 3.23E-39         |
| 700                | 2.46E-17       | 4.36E-06       | 2.65E-05       | 9.16E-18       | 4.62E-23         |
| 800                | 3.47E-15       | 1.08E-03       | 5.20E-03       | 1.45E-13       | 7.03E-18         |
| 900                | 3.75E-13       | 8.41E-02       | 3.27E-01       | 3.22E-10       | 8.10E-14         |
| 1000               | 6.83E-10       | 2.83E+00       | 9.17E+00       | 1.69E-07       | 1.43E-10         |
| 1250               | 4.64E-04       | 1.62E+03       | 3.71E+03       | 1.24E-02       | 8.07E-05         |
| 1375               | 5.82E-02       | 1.54E+04       | 3.08E+04       | 6.13E-01       | 8.74E-03         |
| 1500               | 2.60E+00       | 9.06E+04       | 1.61E+05       | 1.34E+01       | 4.03E-01         |
| 1650               | 9.15E+01       | 4.50E+05       | 7.07E+05       | 2.34E+02       | 1.72E+01         |
| 1750               | 6.00E+02       | 1.02E+06       | 1.49E+06       | 1.07E+03       | 1.39E+02         |
| 1800               | 1.36E+03       | 1.44E+06       | 2.05E+06       | 2.10E+03       | 3.57E+02         |
| 2000               | 1.79E+04       | 4.25E+06       | 5.52E+06       | 1.93E+04       | 8.45E+03         |
| 2250               | 2.71E+05       | ***            | ***            | ***            | 1.52E+05         |
| 2500               | 1.01E+06       | ***            | ***            | ***            | 1.02E+06         |
|                    |                |                |                |                |                  |
| Pressure = 10 atm  |                |                |                |                |                  |
| T(K)               | <b>an4→an1</b> | <b>an4→an3</b> | <b>an4→an5</b> | <b>an4→an7</b> | <b>an4→an-p1</b> |
| 500                | 2.20E-24       | 2.70E-13       | 1.96E-12       | 1.62E-31       | 3.20E-40         |
| 700                | 3.31E-17       | 4.36E-06       | 2.65E-05       | 9.15E-19       | 4.85E-24         |
| 800                | 1.58E-15       | 1.08E-03       | 5.20E-03       | 1.47E-14       | 8.09E-19         |
| 900                | 9.84E-14       | 8.41E-02       | 3.27E-01       | 3.41E-11       | 1.09E-14         |
| 1000               | 1.87E-11       | 2.83E+00       | 9.19E+00       | 1.96E-08       | 2.44E-11         |
| 1125               | 4.16E-08       | 9.81E+01       | 2.62E+02       | 1.29E-05       | 5.75E-08         |
| 1250               | 2.49E-05       | 1.70E+03       | 3.87E+03       | 2.44E-03       | 2.83E-05         |
| 1375               | 4.38E-03       | 1.74E+04       | 3.48E+04       | 1.75E-01       | 4.26E-03         |
| 1500               | 3.11E-01       | 1.19E+05       | 2.11E+05       | 5.71E+00       | 2.58E-01         |
| 1650               | 1.92E+01       | 7.49E+05       | 1.19E+06       | 1.61E+02       | 1.40E+01         |
| 1750               | 1.82E+02       | 2.02E+06       | 3.01E+06       | 9.77E+02       | 1.30E+02         |
| 1800               | 4.90E+02       | 3.11E+06       | 4.49E+06       | 2.17E+03       | 3.53E+02         |
| 2000               | 1.23E+04       | 1.23E+07       | 1.62E+07       | 2.95E+04       | 1.06E+04         |
| 2250               | 1.90E+05       | 3.93E+07       | 4.74E+07       | 3.05E+05       | 2.51E+05         |
| 2500               | 2.64E+06       | ***            | ***            | ***            | 2.46E+06         |
|                    |                |                |                |                |                  |
| Pressure = 100 atm |                |                |                |                |                  |
| T(K)               | <b>an4→an1</b> | <b>an4→an3</b> | <b>an4→an5</b> | <b>an4→an7</b> | <b>an4→an-p1</b> |
| 500                | 7.01E-25       | 2.70E-13       | 1.96E-12       | 1.26E-32       | 2.79E-41         |
| 600                | 8.80E-20       | 3.41E-09       | 2.55E-08       | 3.07E-25       | 6.64E-32         |
| 800                | 8.79E-15       | 1.08E-03       | 5.20E-03       | 1.42E-15       | 7.90E-20         |
| 900                | -3.23E-13      | 8.41E-02       | 3.27E-01       | 3.37E-12       | 1.11E-15         |

|                    |                |                |                |                |                  |
|--------------------|----------------|----------------|----------------|----------------|------------------|
| 1000               | -4.96E-12      | 2.83E+00       | 9.19E+00       | 1.98E-09       | 2.66E-12         |
| 1125               | 1.20E-09       | 9.82E+01       | 2.63E+02       | 1.37E-06       | 7.23E-09         |
| 1250               | 5.42E-07       | 1.71E+03       | 3.89E+03       | 2.91E-04       | 4.42E-06         |
| 1375               | 2.24E-04       | 1.78E+04       | 3.56E+04       | 2.51E-02       | 8.76E-04         |
| 1500               | 1.34E-02       | 1.26E+05       | 2.25E+05       | 1.06E+00       | 7.16E-02         |
| 1650               | 1.28E+00       | 8.87E+05       | 1.41E+06       | 4.37E+01       | 5.57E+00         |
| 1750               | 1.70E+01       | 2.66E+06       | 3.95E+06       | 3.51E+02       | 6.41E+01         |
| 1800               | 5.43E+01       | 4.36E+06       | 6.29E+06       | 8.96E+02       | 1.93E+02         |
| 2000               | 2.72E+03       | 2.29E+07       | 2.99E+07       | 2.06E+04       | 8.21E+03         |
| 2250               | 9.15E+04       | 1.01E+08       | 1.20E+08       | 3.50E+05       | 2.77E+05         |
| 2500               | 9.92E+05       | 2.78E+08       | 3.12E+08       | 2.56E+06       | 3.63E+06         |
|                    |                |                |                |                |                  |
| Pressure = 30 Torr |                |                |                |                |                  |
| T(K)               | <b>an5→an1</b> | <b>an5→an3</b> | <b>an5→an4</b> | <b>an5→an7</b> | <b>an5→an-p1</b> |
| 700                | 3.13E-20       | 5.64E-10       | 4.99E-05       | 1.61E-17       | 3.19E-22         |
| 800                | 3.99E-15       | 1.23E-06       | 9.17E-03       | 5.45E-13       | 4.32E-17         |
| 900                | 3.42E-11       | 5.44E-04       | 5.45E-01       | 1.66E-09       | 3.70E-13         |
| 1000               | 5.95E-06       | 6.82E-02       | 1.43E+01       | 8.49E-07       | 4.59E-10         |
| 1125               | 3.48E-05       | 7.07E+00       | 3.54E+02       | 3.32E-04       | 5.03E-07         |
| 1250               | 7.82E-03       | 2.15E+02       | 3.94E+03       | 2.90E-02       | 1.25E-04         |
| 1375               | 4.52E-01       | 2.53E+03       | 2.28E+04       | 8.45E-01       | 1.07E-02         |
| 1500               | 1.03E+01       | 1.44E+04       | 7.98E+04       | 1.11E+01       | 4.15E-01         |
| 1650               | 1.73E+02       | 6.04E+04       | 2.28E+05       | 1.19E+02       | 1.46E+01         |
| 1750               | 7.29E+02       | 1.20E+05       | 3.84E+05       | 4.30E+02       | 1.04E+02         |
| 1800               | ***            | ***            | ***            | ***            | ***              |
| 2000               | ***            | ***            | ***            | ***            | ***              |
| 2250               | ***            | ***            | ***            | ***            | ***              |
| 2500               | ***            | ***            | ***            | ***            | ***              |
|                    |                |                |                |                |                  |
| Pressure = 1 atm   |                |                |                |                |                  |
| T(K)               | <b>an5→an1</b> | <b>an5→an3</b> | <b>an5→an4</b> | <b>an5→an7</b> | <b>an5→an-p1</b> |
| 500                | 1.35E-24       | 2.26E-21       | 4.57E-12       | 2.37E-34       | 2.11E-41         |
| 700                | 2.93E-17       | 2.25E-11       | 4.99E-05       | 3.81E-20       | 2.38E-24         |
| 800                | 5.79E-15       | 5.18E-08       | 9.18E-03       | 2.27E-15       | 8.27E-19         |
| 900                | 7.07E-14       | 2.64E-05       | 5.49E-01       | 1.48E-11       | 1.82E-14         |
| 1000               | 2.29E-10       | 4.43E-03       | 1.48E+01       | 1.77E-08       | 5.25E-11         |
| 1250               | 3.43E-04       | 4.80E+01       | 5.58E+03       | 4.58E-03       | 6.02E-05         |
| 1375               | 4.76E-02       | 1.19E+03       | 4.51E+04       | 3.19E-01       | 7.72E-03         |
| 1500               | 2.34E+00       | 1.39E+04       | 2.31E+05       | 8.80E+00       | 3.91E-01         |
| 1650               | 8.81E+01       | 1.20E+05       | 9.93E+05       | 1.85E+02       | 1.75E+01         |
| 1750               | 5.94E+02       | 3.49E+05       | 2.07E+06       | 9.17E+02       | 1.44E+02         |
| 1800               | 1.36E+03       | 5.44E+05       | 2.83E+06       | 1.85E+03       | 3.71E+02         |
| 2000               | 1.85E+04       | 2.09E+06       | 7.48E+06       | 1.85E+04       | 8.99E+03         |

|                    |                |                |                |                |                  |
|--------------------|----------------|----------------|----------------|----------------|------------------|
| 2250               | ***            | ***            | ***            | ***            | ***              |
| 2500               | ***            | ***            | ***            | ***            | ***              |
| Pressure = 10 atm  |                |                |                |                |                  |
| T(K)               | <b>an5→an1</b> | <b>an5→an3</b> | <b>an5→an4</b> | <b>an5→an7</b> | <b>an5→an-p1</b> |
| 500                | 3.27E-24       | 2.26E-22       | 4.57E-12       | 2.33E-36       | 2.10E-43         |
| 700                | 3.93E-17       | 2.25E-12       | 4.99E-05       | 3.90E-22       | 2.78E-26         |
| 800                | 7.63E-15       | 5.19E-09       | 9.18E-03       | 2.50E-17       | 1.22E-20         |
| 1000               | 2.19E-12       | 4.66E-04       | 1.48E+01       | 3.12E-10       | 1.81E-12         |
| 1125               | 6.14E-09       | 9.41E-02       | 4.07E+02       | 5.86E-07       | 8.89E-09         |
| 1250               | 4.63E-05       | 7.17E+00       | 5.82E+03       | 2.50E-04       | 7.69E-06         |
| 1375               | 1.77E-03       | 2.51E+02       | 5.10E+04       | 3.30E-02       | 1.77E-03         |
| 1500               | 1.69E-01       | 4.53E+03       | 3.03E+05       | 1.70E+00       | 1.45E-01         |
| 1650               | 1.31E+01       | 6.92E+04       | 1.68E+06       | 7.10E+01       | 1.02E+01         |
| 1750               | 1.38E+02       | 2.88E+05       | 4.18E+06       | 5.25E+02       | 1.06E+02         |
| 1800               | 3.90E+02       | 5.32E+05       | 6.21E+06       | 1.26E+03       | 3.02E+02         |
| 2000               | 1.11E+04       | 3.56E+06       | 2.19E+07       | 2.18E+04       | 1.02E+04         |
| 2250               | 1.85E+05       | 1.61E+07       | 6.30E+07       | 2.65E+05       | 2.56E+05         |
| 2500               | ***            | ***            | ***            | ***            | ***              |
| Pressure = 100 atm |                |                |                |                |                  |
| T(K)               | <b>an5→an1</b> | <b>an5→an3</b> | <b>an5→an4</b> | <b>an5→an7</b> | <b>an5→an-p1</b> |
| 500                | 1.04E-24       | 2.26E-23       | 4.57E-12       | 1.94E-38       | 1.79E-45         |
| 600                | 1.15E-19       | 1.14E-17       | 5.25E-08       | 2.75E-30       | 1.31E-35         |
| 700                | 2.08E-16       | 2.25E-13       | 4.99E-05       | 3.74E-24       | 2.64E-28         |
| 800                | 6.94E-15       | 5.19E-10       | 9.18E-03       | 2.47E-19       | 1.23E-22         |
| 1125               | 2.64E-11       | 9.66E-03       | 4.07E+02       | 7.73E-09       | 1.62E-10         |
| 1250               | 2.13E-08       | 7.79E-01       | 5.85E+03       | 4.45E-06       | 2.16E-07         |
| 1375               | 1.03E-05       | 3.08E+01       | 5.21E+04       | 8.86E-04       | 8.17E-05         |
| 1500               | 2.13E-03       | 6.85E+02       | 3.23E+05       | 7.43E-02       | 1.14E-02         |
| 1650               | 3.46E-01       | 1.51E+04       | 1.98E+06       | 5.91E+00       | 1.47E+00         |
| 1750               | 5.89E+00       | 8.50E+04       | 5.49E+06       | 6.74E+01       | 2.23E+01         |
| 1800               | 2.10E+01       | 1.84E+05       | 8.70E+06       | 2.01E+02       | 7.55E+01         |
| 2000               | 1.49E+03       | 2.34E+06       | 4.05E+07       | 7.60E+03       | 4.68E+03         |
| 2250               | 6.55E+04       | 2.05E+07       | 1.60E+08       | 1.92E+05       | 2.10E+05         |
| 2500               | 8.21E+05       | 8.30E+07       | 4.09E+08       | 1.76E+06       | 3.19E+06         |
| Pressure = 30 Torr |                |                |                |                |                  |
| T(K)               | <b>an7→an1</b> | <b>an7→an3</b> | <b>an7→an4</b> | <b>an7→an5</b> | <b>an7→an-p1</b> |
| 500                | 4.89E-13       | 8.70E-14       | 9.65E-18       | 1.46E-20       | 4.04E-27         |
| 600                | 8.01E-09       | 1.76E-09       | 1.32E-12       | 1.28E-14       | 2.76E-20         |
| 700                | 9.93E-06       | 2.24E-06       | 9.03E-09       | 3.62E-10       | 2.31E-15         |
| 800                | 2.23E-03       | 4.87E-04       | 8.04E-06       | 8.74E-07       | 1.20E-11         |

|                   |                |                |                |                |                  |
|-------------------|----------------|----------------|----------------|----------------|------------------|
| 900               | 1.55E-01       | 3.17E-02       | 1.60E-03       | 3.39E-04       | 9.20E-09         |
| 1000              | 4.70E+00       | 8.54E-01       | 1.01E-01       | 3.53E-02       | 1.78E-06         |
| 1125              | 1.39E+02       | 2.06E+01       | 5.37E+00       | 2.50E+00       | 3.17E-04         |
| 1250              | 1.89E+03       | 2.25E+02       | 1.02E+02       | 5.82E+01       | 1.95E-02         |
| 1375              | 1.35E+04       | 1.36E+03       | 8.98E+02       | 5.74E+02       | 6.06E-01         |
| 1500              | 5.74E+04       | 5.31E+03       | 4.46E+03       | 3.05E+03       | 1.13E+01         |
| 1650              | 1.92E+05       | 1.88E+04       | 1.84E+04       | 1.33E+04       | 2.21E+02         |
| 1750              | 3.38E+05       | 3.76E+04       | 3.90E+04       | 2.89E+04       | 1.24E+03         |
| 1800              | 4.25E+05       | 5.14E+04       | 9.58E+04       | ***            | 2.75E+03         |
| 2000              | ***            | ***            | ***            | ***            | ***              |
| 2250              | ***            | ***            | ***            | ***            | ***              |
| 2500              | ***            | ***            | ***            | ***            | ***              |
| Pressure = 1 atm  |                |                |                |                |                  |
| <b>T(K)</b>       | <b>an7→an1</b> | <b>an7→an3</b> | <b>an7→an4</b> | <b>an7→an5</b> | <b>an7→an-p1</b> |
| 500               | 4.78E-13       | 8.70E-14       | 3.81E-19       | 2.43E-23       | 4.04E-27         |
| 600               | 7.99E-09       | 1.76E-09       | 5.31E-14       | 2.23E-17       | 2.76E-20         |
| 700               | 9.87E-06       | 2.25E-06       | 3.88E-10       | 8.55E-13       | 2.33E-15         |
| 800               | 2.20E-03       | 4.96E-04       | 4.10E-07       | 3.64E-09       | 1.24E-11         |
| 900               | 1.56E-01       | 3.36E-02       | 1.11E-04       | 3.03E-06       | 1.02E-08         |
| 1000              | 4.76E+00       | 9.90E-01       | 1.07E-02       | 6.97E-04       | 2.26E-06         |
| 1125              | 1.48E+02       | 2.88E+01       | 1.05E+00       | 1.49E-01       | 5.02E-04         |
| 1250              | 2.30E+03       | 4.09E+02       | 3.76E+01       | 9.20E+00       | 3.66E-02         |
| 1375              | 2.12E+04       | 3.29E+03       | 6.10E+02       | 2.17E+02       | 1.15E+00         |
| 1500              | 1.26E+05       | 1.67E+04       | 5.27E+03       | 2.42E+03       | 1.95E+01         |
| 1650              | 6.50E+05       | 7.33E+04       | 3.66E+04       | 2.06E+04       | 3.31E+02         |
| 1750              | 1.50E+06       | 1.59E+05       | 9.90E+04       | 6.10E+04       | 1.73E+03         |
| 1800              | 2.14E+06       | 2.23E+05       | 1.52E+05       | 9.72E+04       | 3.75E+03         |
| 2000              | 6.28E+06       | 7.01E+05       | 6.10E+05       | 4.31E+05       | 5.97E+04         |
| 2250              | ***            | ***            | ***            | ***            | ***              |
| 2500              | ***            | ***            | ***            | ***            | ***              |
| Pressure = 10 atm |                |                |                |                |                  |
| <b>T(K)</b>       | <b>an7→an1</b> | <b>an7→an3</b> | <b>an7→an4</b> | <b>an7→an5</b> | <b>an7→an-p1</b> |
| 500               | 2.69E-13       | 8.70E-14       | 3.95E-20       | 3.46E-22       | 4.00E-27         |
| 600               | 6.29E-09       | 1.76E-09       | 5.25E-15       | 1.33E-19       | 2.75E-20         |
| 700               | 9.01E-06       | 2.25E-06       | 3.87E-11       | 8.75E-15       | 2.33E-15         |
| 800               | 2.12E-03       | 4.96E-04       | 4.16E-08       | 4.01E-11       | 1.24E-11         |
| 900               | 1.49E-01       | 3.37E-02       | 1.17E-05       | 3.97E-08       | 1.03E-08         |
| 1000              | 4.47E+00       | 1.00E+00       | 1.25E-03       | 1.23E-05       | 2.30E-06         |
| 1125              | 1.48E+02       | 3.00E+01       | 1.50E-01       | 4.42E-03       | 5.29E-04         |
| 1250              | 2.35E+03       | 4.55E+02       | 7.37E+00       | 5.02E-01       | 4.16E-02         |
| 1375              | 2.26E+04       | 4.13E+03       | 1.74E+02       | 2.24E+01       | 1.47E+00         |

|                    |                |                |                |                |                  |
|--------------------|----------------|----------------|----------------|----------------|------------------|
| 1500               | 1.47E+05       | 2.49E+04       | 2.26E+03       | 4.66E+02       | 2.80E+01         |
| 1650               | 9.21E+05       | 1.38E+05       | 2.52E+04       | 7.92E+03       | 5.06E+02         |
| 1750               | 2.51E+06       | 3.42E+05       | 9.01E+04       | 3.49E+04       | 2.57E+03         |
| 1800               | 3.91E+06       | 5.09E+05       | 1.57E+05       | 6.63E+04       | 5.39E+03         |
| 2000               | 1.61E+07       | 1.84E+06       | 9.16E+05       | 5.01E+05       | 7.24E+04         |
| 2250               | 5.14E+07       | 5.80E+06       | 4.13E+06       | 2.69E+06       | 1.06E+06         |
| 2500               | ***            | ***            | ***            | ***            | ***              |
|                    |                |                |                |                |                  |
| Pressure = 100 atm |                |                |                |                |                  |
| T(K)               | <b>an7→an1</b> | <b>an7→an3</b> | <b>an7→an4</b> | <b>an7→an5</b> | <b>an7→an-p1</b> |
| 500                | 4.50E-14       | 4.78E-14       | -1.32E-18      | -1.20E-19      | 3.69E-27         |
| 600                | 1.53E-09       | 1.76E-09       | 4.77E-16       | -1.00E-17      | 2.61E-20         |
| 700                | 3.24E-06       | 2.25E-06       | 3.65E-12       | 7.53E-17       | 2.25E-15         |
| 800                | 1.07E-03       | 4.96E-04       | 4.03E-09       | 3.96E-13       | 1.21E-11         |
| 900                | 9.70E-02       | 3.38E-02       | 1.16E-06       | 4.07E-10       | 1.01E-08         |
| 1000               | 3.44E+00       | 1.00E+00       | 1.26E-04       | 1.36E-07       | 2.27E-06         |
| 1125               | 1.16E+02       | 3.01E+01       | 1.60E-02       | 5.83E-05       | 5.28E-04         |
| 1250               | 1.82E+03       | 4.62E+02       | 8.77E-01       | 8.94E-03       | 4.21E-02         |
| 1375               | 2.28E+04       | 4.33E+03       | 2.50E+01       | 6.02E-01       | 1.54E+00         |
| 1500               | 1.51E+05       | 2.78E+04       | 4.18E+02       | 2.05E+01       | 3.09E+01         |
| 1650               | 1.01E+06       | 1.75E+05       | 6.84E+03       | 6.58E+02       | 6.15E+02         |
| 1750               | 2.95E+06       | 4.88E+05       | 3.24E+04       | 4.49E+03       | 3.35E+03         |
| 1800               | 4.80E+06       | 7.74E+05       | 6.49E+04       | 1.05E+04       | 7.25E+03         |
| 2000               | 2.53E+07       | 3.59E+06       | 6.40E+05       | 1.74E+05       | 1.03E+05         |
| 2250               | 1.15E+08       | 1.39E+07       | 4.65E+06       | 1.93E+06       | 1.34E+06         |
| 2500               | 3.23E+08       | 3.55E+07       | 1.74E+07       | 9.20E+06       | 1.02E+07         |

c) pyrenyl radicals, C<sub>16</sub>H<sub>9</sub>

| Pressure = 30 Torr |                  |                  |                  |                    |
|--------------------|------------------|------------------|------------------|--------------------|
| T(K)               | <b>pyr1→pyr4</b> | <b>pyr1→pyr2</b> | <b>pyr1→pyr6</b> | <b>pyr1→pyr-p1</b> |
| 500                | 8.85E-15         | 2.94E-13         | 5.68E-31         | 3.47E-45           |
| 600                | 8.07E-11         | 4.56E-09         | 1.89E-23         | 8.56E-35           |
| 700                | 1.17E-07         | 5.87E-06         | 4.64E-18         | 2.30E-27           |
| 800                | 3.49E-05         | 1.39E-03         | 5.23E-14         | 8.24E-22           |
| 900                | 3.25E-03         | 1.02E-01         | 7.42E-11         | 1.60E-17           |
| 1000               | 1.27E-01         | 3.25E+00         | 2.40E-08         | 4.10E-14           |
| 1125               | 5.11E+00         | 1.04E+02         | 7.06E-06         | 1.04E-10           |
| 1250               | 9.51E+01         | 1.57E+03         | 5.75E-04         | 5.84E-08           |
| 1375               | 9.47E+02         | 1.25E+04         | 1.80E-02         | 1.09E-05           |
| 1500               | 5.65E+03         | 5.73E+04         | 2.79E-01         | 8.77E-04           |
| 1650               | 2.83E+04         | 2.05E+05         | 3.87E+00         | 7.13E-02           |
| 1800               | 9.17E+04         | 4.92E+05         | ***              | 2.75E+00           |

|                    |                  |                  |                  |                    |
|--------------------|------------------|------------------|------------------|--------------------|
| 2000               | ***              | ***              | ***              | ***                |
| 2250               | ***              | ***              | ***              | ***                |
| 2500               | ***              | ***              | ***              | ***                |
|                    |                  |                  |                  |                    |
| Pressure = 1 atm   |                  |                  |                  |                    |
| T(K)               | <b>pyr1→pyr4</b> | <b>pyr1→pyr2</b> | <b>pyr1→pyr6</b> | <b>pyr1→pyr-p1</b> |
| 500                | 8.85E-15         | 2.94E-13         | 5.69E-31         | 3.50E-45           |
| 600                | 8.07E-11         | 4.56E-09         | 1.89E-23         | 8.80E-35           |
| 700                | 1.17E-07         | 5.87E-06         | 4.64E-18         | 2.48E-27           |
| 800                | 3.49E-05         | 1.39E-03         | 5.26E-14         | 9.84E-22           |
| 900                | 3.25E-03         | 1.02E-01         | 7.61E-11         | 2.24E-17           |
| 1000               | 1.28E-01         | 3.26E+00         | 2.59E-08         | 6.73E-14           |
| 1125               | 5.22E+00         | 1.06E+02         | 8.81E-06         | 1.93E-10           |
| 1250               | 1.04E+02         | 1.75E+03         | 9.11E-04         | 1.05E-07           |
| 1375               | 1.19E+03         | 1.70E+04         | 3.81E-02         | 1.69E-05           |
| 1500               | 8.86E+03         | 1.08E+05         | 7.82E-01         | 1.15E-03           |
| 1650               | 6.08E+04         | 6.10E+05         | 1.42E+01         | 8.10E-02           |
| 1800               | 2.70E+05         | 2.17E+06         | 1.45E+02         | 2.94E+00           |
| 2000               | 1.18E+06         | 7.00E+06         | 1.74E+03         | 1.57E+02           |
| 2250               | ***              | ***              | ***              | ***                |
| 2500               | ***              | ***              | ***              | ***                |
|                    |                  |                  |                  |                    |
| Pressure = 10 atm  |                  |                  |                  |                    |
| T(K)               | <b>pyr1→pyr4</b> | <b>pyr1→pyr2</b> | <b>pyr1→pyr6</b> | <b>pyr1→pyr-p1</b> |
| 500                | 8.85E-15         | 2.94E-13         | 5.69E-31         | 3.50E-45           |
| 600                | 8.07E-11         | 4.56E-09         | 1.89E-23         | 8.81E-35           |
| 700                | 1.17E-07         | 5.87E-06         | 4.64E-18         | 2.49E-27           |
| 800                | 3.49E-05         | 1.39E-03         | 5.26E-14         | 9.94E-22           |
| 900                | 3.25E-03         | 1.02E-01         | 7.62E-11         | 2.29E-17           |
| 1000               | 1.28E-01         | 3.26E+00         | 2.60E-08         | 7.14E-14           |
| 1125               | 5.22E+00         | 1.06E+02         | 8.97E-06         | 2.22E-10           |
| 1250               | 1.04E+02         | 1.76E+03         | 9.64E-04         | 1.36E-07           |
| 1375               | 1.22E+03         | 1.76E+04         | 4.40E-02         | 2.50E-05           |
| 1500               | 9.52E+03         | 1.19E+05         | 1.04E+00         | 1.82E-03           |
| 1650               | 7.33E+04         | 7.91E+05         | 2.30E+01         | 1.24E-01           |
| 1800               | 3.84E+05         | 3.58E+06         | 2.81E+02         | 3.99E+00           |
| 2000               | 2.15E+06         | 1.62E+07         | 3.97E+03         | 1.82E+02           |
| 2250               | 1.01E+07         | 5.77E+07         | 5.25E+04         | 8.64E+03           |
| 2500               | ***              | ***              | ***              | ***                |
|                    |                  |                  |                  |                    |
| Pressure = 100 atm |                  |                  |                  |                    |
| T(K)               | <b>pyr1→pyr4</b> | <b>pyr1→pyr2</b> | <b>pyr1→pyr6</b> | <b>pyr1→pyr-p1</b> |
| 500                | 8.85E-15         | 2.94E-13         | 6.47E-31         | 3.51E-45           |

|                    |                  |                  |                  |                    |
|--------------------|------------------|------------------|------------------|--------------------|
| 600                | 8.07E-11         | 4.56E-09         | 1.89E-23         | 8.82E-35           |
| 700                | 1.17E-07         | 5.87E-06         | 4.64E-18         | 2.49E-27           |
| 800                | 3.49E-05         | 1.39E-03         | 5.26E-14         | 9.95E-22           |
| 900                | 3.25E-03         | 1.02E-01         | 7.62E-11         | 2.30E-17           |
| 1000               | 1.28E-01         | 3.26E+00         | 2.60E-08         | 7.19E-14           |
| 1125               | 5.23E+00         | 1.07E+02         | 8.98E-06         | 2.26E-10           |
| 1250               | 1.04E+02         | 1.76E+03         | 9.71E-04         | 1.43E-07           |
| 1375               | 1.22E+03         | 1.76E+04         | 4.50E-02         | 2.78E-05           |
| 1500               | 9.63E+03         | 1.21E+05         | 1.10E+00         | 2.22E-03           |
| 1650               | 7.62E+04         | 8.33E+05         | 2.66E+01         | 1.72E-01           |
| 1800               | 4.27E+05         | 4.13E+06         | 3.70E+02         | 6.18E+00           |
| 2000               | 2.77E+06         | 2.31E+07         | 6.32E+03         | 2.89E+02           |
| 2250               | 1.65E+07         | 1.15E+08         | 9.77E+04         | 1.21E+04           |
| 2500               | 6.20E+07         | 3.53E+08         | 8.26E+05         | 2.28E+05           |
|                    |                  |                  |                  |                    |
| Pressure = 30 Torr |                  |                  |                  |                    |
| T(K)               | <b>pyr2→pyr4</b> | <b>pyr2→pyr1</b> | <b>pyr2→pyr6</b> | <b>pyr2→pyr-p1</b> |
| 500                | 3.09E-24         | 1.58E-13         | 4.24E-33         | 1.67E-47           |
| 600                | 4.81E-18         | 2.70E-09         | 2.09E-27         | 1.39E-36           |
| 700                | 2.30E-13         | 3.70E-06         | 4.01E-21         | 1.13E-28           |
| 800                | 1.08E-09         | 9.18E-04         | 2.22E-16         | 1.04E-22           |
| 900                | 9.81E-07         | 6.99E-02         | 1.26E-12         | 4.29E-18           |
| 1000               | 2.60E-04         | 2.29E+00         | 1.26E-09         | 1.91E-14           |
| 1125               | 7.05E-02         | 7.53E+01         | 1.10E-06         | 7.45E-11           |
| 1250               | 5.43E+00         | 1.16E+03         | 1.92E-04         | 5.06E-08           |
| 1375               | 1.48E+02         | 9.43E+03         | 9.76E-03         | 1.01E-05           |
| 1500               | 1.72E+03         | 4.39E+04         | 2.00E-01         | 8.32E-04           |
| 1650               | 1.38E+04         | 1.59E+05         | 3.28E+00         | 6.79E-02           |
| 1800               | 5.65E+04         | 3.87E+05         | ***              | 2.55E+00           |
| 2000               | 2.30E+05         | ***              | ***              | 1.25E+02           |
| 2250               | ***              | ***              | ***              | 4.03E+03           |
| 2500               | ***              | ***              | ***              | 3.93E+04           |
|                    |                  |                  |                  |                    |
| Pressure = 1 atm   |                  |                  |                  |                    |
| T(K)               | <b>pyr2→pyr4</b> | <b>pyr2→pyr1</b> | <b>pyr2→pyr6</b> | <b>pyr2→pyr-p1</b> |
| 500                | 1.22E-25         | 1.58E-13         | 4.87E-37         | 6.69E-49           |
| 600                | 1.90E-19         | 2.70E-09         | 1.08E-28         | 5.84E-38           |
| 700                | 9.09E-15         | 3.70E-06         | 1.59E-22         | 5.37E-30           |
| 800                | 4.28E-11         | 9.18E-04         | 9.23E-18         | 6.43E-24           |
| 900                | 3.96E-08         | 7.00E-02         | 5.85E-14         | 4.02E-19           |
| 1000               | 1.12E-05         | 2.30E+00         | 7.50E-11         | 2.99E-15           |
| 1125               | 3.72E-03         | 7.71E+01         | 1.08E-07         | 2.24E-11           |
| 1250               | 4.26E-01         | 1.29E+03         | 3.71E-05         | 2.61E-08           |

|                    |                  |                  |                  |                    |
|--------------------|------------------|------------------|------------------|--------------------|
| 1375               | 2.06E+01         | 1.29E+04         | 4.04E-03         | 7.53E-06           |
| 1500               | 4.72E+02         | 8.31E+04         | 1.72E-01         | 7.58E-04           |
| 1650               | 8.69E+03         | 4.74E+05         | 5.79E+00         | 6.85E-02           |
| 1800               | 7.42E+04         | 1.71E+06         | 8.65E+01         | 2.74E+00           |
| 2000               | 5.33E+05         | 5.58E+06         | 1.34E+03         | 1.49E+02           |
| 2250               | 3.25E+06         | ***              | ***              | 7.41E+03           |
| 2500               | ***              | ***              | ***              | 1.25E+05           |
|                    |                  |                  |                  |                    |
| Pressure = 10 atm  |                  |                  |                  |                    |
| T(K)               | <b>pyr2→pyr4</b> | <b>pyr2→pyr1</b> | <b>pyr2→pyr6</b> | <b>pyr2→pyr-p1</b> |
| 500                | 1.22E-26         | 1.58E-13         | 4.70E-38         | 6.65E-50           |
| 600                | 1.90E-20         | 2.70E-09         | 1.08E-29         | 5.83E-39           |
| 700                | 9.09E-16         | 3.70E-06         | 1.59E-23         | 5.40E-31           |
| 800                | 4.28E-12         | 9.18E-04         | 9.24E-19         | 6.59E-25           |
| 900                | 3.96E-09         | 7.00E-02         | 5.90E-15         | 4.32E-20           |
| 1000               | 1.12E-06         | 2.30E+00         | 7.73E-12         | 3.54E-16           |
| 1125               | 3.80E-04         | 7.72E+01         | 1.20E-08         | 3.29E-12           |
| 1250               | 4.61E-02         | 1.30E+03         | 4.85E-06         | 5.29E-09           |
| 1375               | 2.55E+00         | 1.33E+04         | 6.98E-04         | 2.23E-06           |
| 1500               | 7.43E+01         | 9.14E+04         | 4.36E-02         | 3.28E-04           |
| 1650               | 2.08E+03         | 6.15E+05         | 2.50E+00         | 4.33E-02           |
| 1800               | 2.94E+04         | 2.82E+06         | 6.28E+01         | 2.24E+00           |
| 2000               | 4.08E+05         | 1.29E+07         | 1.69E+03         | 1.45E+02           |
| 2250               | 3.67E+06         | 4.66E+07         | 3.41E+04         | 7.98E+03           |
| 2500               | 2.17E+07         | ***              | ***              | 1.79E+05           |
|                    |                  |                  |                  |                    |
| Pressure = 100 atm |                  |                  |                  |                    |
| T(K)               | <b>pyr2→pyr4</b> | <b>pyr2→pyr1</b> | <b>pyr2→pyr6</b> | <b>pyr2→pyr-p1</b> |
| 500                | 3.23E-22         | 1.58E-13         | 1.37E-32         | 2.64E-50           |
| 600                | 1.93E-21         | 2.70E-09         | 1.07E-30         | 5.60E-40           |
| 700                | 9.09E-17         | 3.70E-06         | 1.59E-24         | 5.26E-32           |
| 800                | 4.28E-13         | 9.18E-04         | 9.22E-20         | 6.48E-26           |
| 900                | 3.96E-10         | 7.00E-02         | 5.89E-16         | 4.29E-21           |
| 1000               | 1.12E-07         | 2.30E+00         | 7.74E-13         | 3.57E-17           |
| 1125               | 3.81E-05         | 7.72E+01         | 1.21E-09         | 3.47E-13           |
| 1250               | 4.66E-03         | 1.30E+03         | 5.05E-07         | 6.09E-10           |
| 1375               | 2.63E-01         | 1.33E+04         | 7.78E-05         | 2.99E-07           |
| 1500               | 8.15E+00         | 9.27E+04         | 5.54E-03         | 5.48E-05           |
| 1650               | 2.65E+02         | 6.47E+05         | 4.12E-01         | 1.02E-02           |
| 1800               | 4.87E+03         | 3.25E+06         | 1.48E+01         | 7.64E-01           |
| 2000               | 1.11E+05         | 1.84E+07         | 6.94E+02         | 7.84E+01           |
| 2250               | 2.00E+06         | 9.26E+07         | 2.59E+04         | 6.36E+03           |
| 2500               | 1.48E+07         | 2.88E+08         | 3.72E+05         | 1.70E+05           |



| Pressure = 30 Torr |           |           |           |             |
|--------------------|-----------|-----------|-----------|-------------|
| T(K)               | pyr4→pyr1 | pyr4→pyr2 | pyr4→pyr6 | pyr4→pyr-p1 |
| 500                | 5.72E-15  | 3.70E-24  | 4.36E-34  | 1.25E-48    |
| 600                | 5.55E-11  | 5.60E-18  | 4.89E-26  | 1.15E-37    |
| 700                | 8.38E-08  | 2.63E-13  | 3.56E-20  | 1.07E-29    |
| 800                | 2.60E-05  | 1.21E-09  | 9.83E-16  | 1.21E-23    |
| 900                | 2.48E-03  | 1.09E-06  | 2.96E-12  | 6.86E-19    |
| 1000               | 9.92E-02  | 2.87E-04  | 1.86E-09  | 4.56E-15    |
| 1125               | 4.06E+00  | 7.72E-02  | 1.15E-06  | 3.00E-11    |
| 1250               | 7.67E+01  | 5.91E+00  | 1.75E-04  | 3.12E-08    |
| 1375               | 7.75E+02  | 1.60E+02  | 8.81E-03  | 8.19E-06    |
| 1500               | 4.67E+03  | 1.86E+03  | 1.87E-01  | 7.72E-04    |
| 1650               | 2.37E+04  | 1.48E+04  | 3.21E+00  | 6.73E-02    |
| 1800               | 7.76E+04  | 6.03E+04  | ***       | 2.60E+00    |
| 2000               | ***       | 4.42E+05  | ***       | 1.24E+02    |
| 2250               | ***       | ***       | ***       | ***         |
| 2500               | ***       | ***       | ***       | ***         |
| Pressure = 1 atm   |           |           |           |             |
| T(K)               | pyr4→pyr1 | pyr4→pyr2 | pyr4→pyr6 | pyr4→pyr-p1 |
| 500                | 5.72E-15  | 1.46E-25  | 4.35E-34  | 5.00E-50    |
| 600                | 5.55E-11  | 2.21E-19  | 4.87E-26  | 4.71E-39    |
| 700                | 8.38E-08  | 1.04E-14  | 3.53E-20  | 4.74E-31    |
| 800                | 2.60E-05  | 4.81E-11  | 9.69E-16  | 6.25E-25    |
| 900                | 2.48E-03  | 4.40E-08  | 2.88E-12  | 4.37E-20    |
| 1000               | 9.95E-02  | 1.23E-05  | 1.78E-09  | 3.73E-16    |
| 1125               | 4.15E+00  | 4.07E-03  | 1.13E-06  | 3.52E-12    |
| 1250               | 8.36E+01  | 4.64E-01  | 1.99E-04  | 5.59E-09    |
| 1375               | 9.74E+02  | 2.23E+01  | 1.34E-02  | 2.32E-06    |
| 1500               | 7.33E+03  | 5.09E+02  | 4.18E-01  | 3.35E-04    |
| 1650               | 5.08E+04  | 9.33E+03  | 1.13E+01  | 4.34E-02    |
| 1800               | 2.28E+05  | 7.93E+04  | 1.48E+02  | 2.20E+00    |
| 2000               | 1.01E+06  | 5.66E+05  | 2.03E+03  | 1.41E+02    |
| 2250               | ***       | 6.25E+06  | ***       | 7.32E+03    |
| 2500               | ***       | ***       | ***       | ***         |
| Pressure = 10 atm  |           |           |           |             |
| T(K)               | pyr4→pyr1 | pyr4→pyr2 | pyr4→pyr6 | pyr4→pyr-p1 |
| 500                | 5.72E-15  | 1.47E-26  | 4.35E-34  | 4.97E-51    |
| 600                | 5.55E-11  | 2.21E-20  | 4.87E-26  | 4.70E-40    |
| 700                | 8.38E-08  | 1.04E-15  | 3.53E-20  | 4.75E-32    |
| 800                | 2.60E-05  | 4.81E-12  | 9.69E-16  | 6.35E-26    |

|                    |                  |                  |                  |                    |
|--------------------|------------------|------------------|------------------|--------------------|
| 900                | 2.48E-03         | 4.41E-09         | 2.88E-12         | 4.57E-21           |
| 1000               | 9.96E-02         | 1.24E-06         | 1.78E-09         | 4.13E-17           |
| 1125               | 4.15E+00         | 4.16E-04         | 1.13E-06         | 4.40E-13           |
| 1250               | 8.40E+01         | 5.02E-02         | 2.00E-04         | 8.30E-10           |
| 1375               | 9.98E+02         | 2.76E+00         | 1.39E-02         | 4.24E-07           |
| 1500               | 7.87E+03         | 8.02E+01         | 4.77E-01         | 7.84E-05           |
| 1650               | 6.13E+04         | 2.24E+03         | 1.58E+01         | 1.42E-02           |
| 1800               | 3.24E+05         | 3.15E+04         | 2.72E+02         | 1.01E+00           |
| 2000               | 1.83E+06         | 4.35E+05         | 5.32E+03         | 9.37E+01           |
| 2250               | 8.74E+06         | 3.88E+06         | 8.14E+04         | 6.77E+03           |
| 2500               | ***              | 4.15E+07         | ***              | 1.74E+05           |
|                    |                  |                  |                  |                    |
| Pressure = 100 atm |                  |                  |                  |                    |
| T(K)               | <b>pyr4→pyr1</b> | <b>pyr4→pyr2</b> | <b>pyr4→pyr6</b> | <b>pyr4→pyr-p1</b> |
| 500                | 5.72E-15         | -3.95E-17        | 7.36E-29         | 1.45E-47           |
| 600                | 5.54E-11         | 2.15E-17         | -7.06E-22        | 9.47E-42           |
| 700                | 8.38E-08         | 1.04E-16         | 3.53E-20         | 4.62E-33           |
| 800                | 2.60E-05         | 4.81E-13         | 9.69E-16         | 6.23E-27           |
| 900                | 2.48E-03         | 4.41E-10         | 2.88E-12         | 4.52E-22           |
| 1000               | 9.96E-02         | 1.24E-07         | 1.78E-09         | 4.14E-18           |
| 1125               | 4.15E+00         | 4.17E-05         | 1.13E-06         | 4.53E-14           |
| 1250               | 8.41E+01         | 5.07E-03         | 2.00E-04         | 9.00E-11           |
| 1375               | 1.00E+03         | 2.85E-01         | 1.40E-02         | 5.01E-08           |
| 1500               | 7.96E+03         | 8.80E+00         | 4.85E-01         | 1.05E-05           |
| 1650               | 6.37E+04         | 2.85E+02         | 1.69E+01         | 2.31E-03           |
| 1800               | 3.60E+05         | 5.22E+03         | 3.22E+02         | 2.10E-01           |
| 2000               | 2.36E+06         | 1.19E+05         | 7.96E+03         | 2.86E+01           |
| 2250               | 1.42E+07         | 2.12E+06         | 1.75E+05         | 3.28E+03           |
| 2500               | 5.35E+07         | 1.55E+07         | 1.76E+06         | 1.15E+05           |
|                    |                  |                  |                  |                    |
| Pressure = 30 Torr |                  |                  |                  |                    |
| T(K)               | <b>pyr6→pyr4</b> | <b>pyr6→pyr1</b> | <b>pyr6→pyr2</b> | <b>pyr6→pyr-p1</b> |
| 500                | 6.14E-12         | 5.17E-09         | 2.01E-13         | 4.86E-24           |
| 600                | 5.56E-08         | 1.48E-05         | 3.63E-09         | 1.15E-17           |
| 700                | 4.71E-05         | 4.41E-03         | 6.03E-06         | 4.27E-13           |
| 800                | 8.08E-03         | 3.20E-01         | 2.06E-03         | 1.17E-09           |
| 900                | 4.65E-01         | 8.87E+00         | 2.19E-01         | 5.49E-07           |
| 1000               | 1.22E+01         | 1.23E+02         | 9.35E+00         | 7.16E-05           |
| 1125               | 3.14E+02         | 1.54E+03         | 3.32E+02         | 8.00E-03           |
| 1250               | 3.77E+03         | 9.99E+03         | 4.49E+03         | 2.66E-01           |
| 1375               | 2.36E+04         | 3.94E+04         | 2.84E+04         | 3.43E+00           |
| 1500               | 8.82E+04         | 1.08E+05         | 1.03E+05         | 2.20E+01           |
| 1650               | 2.65E+05         | 2.67E+05         | 2.97E+05         | 1.15E+02           |

|                    |                  |                  |                  |                    |
|--------------------|------------------|------------------|------------------|--------------------|
| 1800               | ***              | ***              | ***              | ***                |
| 2000               | ***              | ***              | ***              | ***                |
| 2250               | ***              | ***              | ***              | ***                |
| 2500               | ***              | ***              | ***              | ***                |
|                    |                  |                  |                  |                    |
| Pressure = 1 atm   |                  |                  |                  |                    |
| T(K)               | <b>pyr6→pyr4</b> | <b>pyr6→pyr1</b> | <b>pyr6→pyr2</b> | <b>pyr6→pyr-p1</b> |
| 500                | 6.13E-12         | 5.17E-09         | 8.21E-15         | 4.86E-24           |
| 600                | 5.54E-08         | 1.48E-05         | 1.43E-10         | 1.15E-17           |
| 700                | 4.68E-05         | 4.42E-03         | 2.41E-07         | 4.28E-13           |
| 800                | 7.97E-03         | 3.22E-01         | 8.54E-05         | 1.19E-09           |
| 900                | 4.52E-01         | 9.10E+00         | 1.02E-02         | 5.74E-07           |
| 1000               | 1.17E+01         | 1.32E+02         | 5.44E-01         | 8.16E-05           |
| 1125               | 3.11E+02         | 1.92E+03         | 3.25E+01         | 1.16E-02           |
| 1250               | 4.29E+03         | 1.58E+04         | 8.70E+02         | 5.90E-01           |
| 1375               | 3.59E+04         | 8.36E+04         | 1.17E+04         | 1.36E+01           |
| 1500               | 1.98E+05         | 3.05E+05         | 8.79E+04         | 1.62E+02           |
| 1650               | 9.38E+05         | 9.84E+05         | 5.20E+05         | 1.57E+03           |
| 1800               | 2.88E+06         | 2.38E+06         | 1.83E+06         | 8.41E+03           |
| 2000               | 7.85E+06         | 5.94E+06         | 5.88E+06         | 4.61E+04           |
| 2250               | ***              | ***              | ***              | ***                |
| 2500               | ***              | ***              | ***              | ***                |
|                    |                  |                  |                  |                    |
| Pressure = 10 atm  |                  |                  |                  |                    |
| T(K)               | <b>pyr6→pyr4</b> | <b>pyr6→pyr1</b> | <b>pyr6→pyr2</b> | <b>pyr6→pyr-p1</b> |
| 500                | 6.13E-12         | 5.17E-09         | 7.93E-16         | 4.86E-24           |
| 600                | 5.54E-08         | 1.48E-05         | 1.43E-11         | 1.15E-17           |
| 700                | 4.68E-05         | 4.42E-03         | 2.41E-08         | 4.28E-13           |
| 800                | 7.97E-03         | 3.22E-01         | 8.55E-06         | 1.19E-09           |
| 900                | 4.52E-01         | 9.11E+00         | 1.03E-03         | 5.75E-07           |
| 1000               | 1.17E+01         | 1.33E+02         | 5.60E-02         | 8.21E-05           |
| 1125               | 3.09E+02         | 1.95E+03         | 3.60E+00         | 1.19E-02           |
| 1250               | 4.31E+03         | 1.68E+04         | 1.14E+02         | 6.36E-01           |
| 1375               | 3.74E+04         | 9.64E+04         | 2.03E+03         | 1.64E+01           |
| 1500               | 2.25E+05         | 4.05E+05         | 2.23E+04         | 2.40E+02           |
| 1650               | 1.32E+06         | 1.60E+06         | 2.24E+05         | 3.27E+03           |
| 1800               | 5.32E+06         | 4.62E+06         | 1.32E+06         | 2.57E+04           |
| 2000               | 2.11E+07         | 1.34E+07         | 7.26E+06         | 2.04E+05           |
| 2250               | 6.42E+07         | 3.70E+07         | 3.05E+07         | 1.33E+06           |
| 2500               | ***              | ***              | ***              | ***                |
|                    |                  |                  |                  |                    |
| Pressure = 100 atm |                  |                  |                  |                    |
| T(K)               | <b>pyr6→pyr4</b> | <b>pyr6→pyr1</b> | <b>pyr6→pyr2</b> | <b>pyr6→pyr-p1</b> |

|      |          |          |          |          |
|------|----------|----------|----------|----------|
| 500  | 5.59E-12 | 5.17E-09 | 7.43E-17 | 4.82E-24 |
| 700  | 4.68E-05 | 4.42E-03 | 2.39E-09 | 4.27E-13 |
| 800  | 7.97E-03 | 3.22E-01 | 8.53E-07 | 1.18E-09 |
| 900  | 4.52E-01 | 9.11E+00 | 1.03E-04 | 5.74E-07 |
| 1000 | 1.17E+01 | 1.33E+02 | 5.61E-03 | 8.20E-05 |
| 1125 | 3.09E+02 | 1.96E+03 | 3.64E-01 | 1.19E-02 |
| 1250 | 4.31E+03 | 1.69E+04 | 1.18E+01 | 6.41E-01 |
| 1375 | 3.75E+04 | 9.86E+04 | 2.26E+02 | 1.68E+01 |
| 1500 | 2.29E+05 | 4.29E+05 | 2.83E+03 | 2.56E+02 |
| 1650 | 1.40E+06 | 1.85E+06 | 3.68E+04 | 3.87E+03 |
| 1800 | 6.30E+06 | 6.11E+06 | 3.11E+05 | 3.62E+04 |
| 2000 | 3.16E+07 | 2.14E+07 | 2.95E+06 | 3.95E+05 |
| 2250 | 1.41E+08 | 6.79E+07 | 2.25E+07 | 3.69E+06 |
| 2500 | 3.95E+08 | 1.64E+08 | 9.25E+07 | 1.90E+07 |

## Input file for MESS calculations for acetanaphthylenyl C<sub>12</sub>H<sub>7</sub>

```
TemperatureList[K]          500. 600. 700. 800. 900. 1000. 1125.
1250. 1375. 1500. 1650. 1750. 1800. 2000. 2250. 2500.
PressureList[atm]           0.03947368 1. 10. 100.
EnergyStepOverTemperature   0.2          #Ratio of discretization
energy step to T
ExcessEnergyOverTemperature 100
ModelEnergyLimit[kcal/mol]  900
WellCutoff                  10
ChemicalEigenvalueMax      0.2
ChemicalEigenvalueMin      1.e-6          #only for direct
diagonalization method
CalculationMethod           direct
EigenvalueOutput            eigenvalue.out
Reactant p0 #ground energy of bimolecular species will be used as a
reference.
Model
EnergyRelaxation
Exponential
Factor[1/cm]                424      ! Jasper calc N2
Power                        0.62
ExponentCutoff              15
End
CollisionFrequency
LennardJones
Epsilons[1/cm]              390. 390.    ! N2 , A3/A3a/A6 ! from new Jasper calc
11/22/2015
Sigmas[angstrom]            4.46 4.46    ! N2 , A3/A3a/A6 ! from new Jasper calc
11/22/2015
End
OutputTemperatureStep[K]    100
OutputTemperatureSize       20
OutputReferenceEnergy[kcal/mol] 0.
!-----
-----
!-----acenaphthyl_r1-----
Well          r1
Species
RRHO
Geometry[angstrom]  19
C  -7.181696E-4  0.1435829247  0.0
C  -0.0022138539 -1.2508989365  0.0
C  1.2795848959  -1.8760814616  0.0
C  2.4231964015  -1.1026278286  0.0
C  2.3872671119  0.3220807881  0.0
C  1.1632254154  0.953615526   0.0
C  -1.1741020156 0.9453582479  0.0
C  -2.3985522807 0.3159759915  0.0
C  -2.4304637694 -1.1061536675  0.0
```

```

C -1.2821088291 -1.8756454309 0.0
C 0.693693617 2.3606539277 0.0
C -0.6535341127 2.3098696137 0.0
H 1.3552589179 -2.9582184066 0.0
H 3.3906452688 -1.5925634837 0.0
H 3.3185404911 0.8783282952 0.0
H -3.3269994117 0.8756467813 0.0
H -3.3956523455 -1.6000491436 0.0
H -1.3559796286 -2.9579994708 0.0
H 1.3241382972 3.2379477337 0.0
Core RigidRotor
SymmetryFactor 1.0
End
Frequencies[1/cm] 51
158.0710 211.6969 234.7778
365.9744 422.2033 455.6565
485.1063 516.1505 552.7046
554.0561 618.2513 642.5834
671.1068 688.2660 754.1094
770.3678 796.7588 812.9834
839.9674 872.6851 920.8921
928.7725 976.3406 986.7715
1012.2674 1031.6820 1056.2176
1090.2221 1167.5662 1194.6249
1205.5967 1235.8709 1252.5743
1263.5522 1373.4543 1401.4680
1447.5953 1448.8568 1471.5426
1512.8806 1520.6319 1629.9215
1643.4957 1654.9728 3161.1479
3163.9318 3171.9540 3176.4411
3184.3486 3188.3929 3223.4979
ZeroEnergy[kcal/mol] 4.12
ElectronicLevels[1/cm] 1
0 2
End
End
!-----
!-----acenaphthyl_r2-----
Well r2
Species
RRHO
Geometry[angstrom] 19
C 0.0 0.0019761092 -0.1448036619
C 0.0 0.0064044823 1.251016489
C 0.0 1.1637766989 -0.9714381007
C 0.0 -1.1578260868 -0.9552866917
C 0.0 2.3357344401 -0.2812477774
C 0.0 -2.3832209095 -0.3210360726
C 0.0 2.437907745 1.1182711139
C 0.0 -2.4207908479 1.1006636102

```

```

C 0.0 1.2825585628 1.8871021642
C 0.0 -1.2747226617 1.8737533405
C 0.0 0.6768149646 -2.3581108212
C 0.0 -0.6846062214 -2.3471296489
H 0.0 1.3109278774 -3.233061325
H 0.0 -1.3235993472 -3.2195474395
H 0.0 -3.3142556515 -0.8782856269
H 0.0 3.4101425532 1.5985161277
H 0.0 -3.3873480651 1.5919593234
H 0.0 1.3539196615 2.9700947145
H 0.0 -1.3511493037 2.9558812822
Core RigidRotor
SymmetryFactor 1.0
End
Frequencies[1/cm] 51
162.1411 215.6859 223.6765
376.3819 427.7729 464.1174
471.8980 517.9078 556.0147
571.9585 608.4848 667.4815
669.6252 691.8142 733.6112
761.0282 788.2923 806.8620
836.4440 872.5436 922.6499
934.7380 954.8575 982.5604
1019.2727 1042.3579 1078.5341
1103.5450 1126.9311 1166.5715
1201.6016 1235.6751 1253.6049
1309.6430 1339.6364 1396.1015
1434.0218 1441.5528 1480.1225
1493.9906 1534.0507 1605.1169
1630.9804 1649.3440 3160.3959
3161.1777 3169.5571 3177.5608
3185.0777 3208.3877 3230.3486
ZeroEnergy[kcal/mol] 0.16
ElectronicLevels[1/cm] 1
0 2
End
End
!-----
!-----acenaphthyl_r3-----
Well r3
Species
RRHO
Geometry[angstrom] 19
C 0.0 0.0039417783 -0.1367277615
C 0.0 -0.0023575553 1.2596950531
C 0.0 1.1627493909 -0.9532511296
C 0.0 -1.1558544216 -0.946196373
C 0.0 2.4010854911 -0.3313021172
C 0.0 -2.3841340466 -0.3207526409
C 0.0 2.3683852359 1.0708880709

```

```

C 0.0 -2.4265464544 1.1018680847
C 0.0 1.2846463671 1.8952896836
C 0.0 -1.2846437591 1.8803813062
C 0.0 0.6810288767 -2.3452214167
C 0.0 -0.6795993455 -2.3400065167
H 0.0 1.3142764616 -3.2216755346
H 0.0 -1.3166806598 -3.2140189788
H 0.0 3.3373716367 -0.879184689
H 0.0 -3.3128383324 -0.881479214
H 0.0 -3.3951237739 1.5896528761
H 0.0 1.3760848441 2.9764923794
H 0.0 -1.3648167339 2.9620909181
Core RigidRotor
SymmetryFactor 1.0
End
Frequencies[1/cm] 51
162.0936 215.2115 226.7142
368.2147 422.0645 463.2916
470.3589 516.2825 558.4451
559.7193 602.6398 665.7470
667.7912 690.4240 730.4871
771.1028 800.4515 809.7866
853.1106 871.6318 884.2082
922.7464 936.3854 982.1307
1026.9503 1035.9694 1049.8317
1098.2924 1105.2787 1186.1405
1205.2073 1214.6736 1258.4951
1320.8538 1348.4557 1390.7478
1410.1140 1454.2976 1466.1424
1501.5230 1537.1915 1590.9339
1641.2609 1650.1730 3161.4360
3164.0802 3168.0891 3171.8805
3184.6159 3203.8687 3223.9657
ZeroEnergy[kcal/mol] 0.00
ElectronicLevels[1/cm] 1
0 2
End
End
!-----
!-----acenaphthyl_r4-----
Well r4
Species
RRHO
Geometry[angstrom] 19
C 0.0 3.96774E-5 -0.1368658817
C 0.0 -0.0140147665 1.2655318374
C 0.0 1.1629814968 -0.9444930601
C 0.0 -1.1611051002 -0.9469791407
C 0.0 2.39577719 -0.325848674
C 0.0 -2.3880881519 -0.3189103252

```



```

C 0.0 2.4454932641 1.1057836919
C 0.0 -2.4328931655 1.1041336603
C 0.0 1.2818876951 1.814486037
C 0.0 -1.2947582424 1.8872663853
C 0.0 0.6813654552 -2.3361080927
C 0.0 -0.6796630273 -2.3381869762
H 0.0 1.3162163352 -3.2116438619
H 0.0 -1.3133931935 -3.2144222641
H 0.0 3.3241957076 -0.8879899169
H 0.0 -3.3170178097 -0.8794144426
H 0.0 3.4080448597 1.6060298141
H 0.0 -3.4028638425 1.5887905066
H 0.0 -1.3712953815 2.9680537034

```

Core RigidRotor

SymmetryFactor 1.0

End

Frequencies[1/cm] 51

|           |           |           |
|-----------|-----------|-----------|
| 157.2825  | 213.5453  | 237.2940  |
| 381.9429  | 428.9109  | 449.2605  |
| 472.3204  | 509.1968  | 559.6401  |
| 564.6478  | 609.5205  | 671.1112  |
| 674.3249  | 690.6572  | 734.1413  |
| 779.8698  | 798.7868  | 808.9582  |
| 834.4591  | 868.1226  | 923.8605  |
| 933.4268  | 945.3124  | 984.4662  |
| 1016.2160 | 1032.9910 | 1061.0394 |
| 1101.0921 | 1119.6881 | 1187.6259 |
| 1210.8697 | 1219.0778 | 1259.9443 |
| 1326.8316 | 1357.8954 | 1377.0539 |
| 1415.2627 | 1444.3457 | 1480.0577 |
| 1490.0693 | 1536.5344 | 1607.0549 |
| 1635.0590 | 1652.1661 | 3158.8629 |
| 3163.8443 | 3173.3513 | 3177.0919 |
| 3192.0788 | 3204.2050 | 3224.0658 |

ZeroEnergy[kcal/mol] 0.81

ElectronicLevels[1/cm] 1

0 2

End

End

!-----

!-----acenaphthyl\_i1-----

Well i1

Species

RRHO

Geometry[angstrom] 19

```

C -0.0056221435 -0.6324571341 0.0
C -0.0059859306 -2.0700791607 0.0
C 1.2393583668 -2.7487025659 0.0
C 2.4221507738 -2.0484339481 0.0
C 2.425403286 -0.6393533042 0.0

```

```

C  1.2390257966   0.0765261518   0.0
C  -1.2643732144  -0.0246390531   0.0
C  -2.4639201198  -0.6548521258   0.0
C  -2.4449007176  -2.078276247    0.0
C  -1.2502079527  -2.7570685516   0.0
C  1.2477968344   1.502000949     0.0
C  1.2614978649   2.7061251041    0.0
H  1.2429772248  -3.8336760706   0.0
H  3.3673287938  -2.5790591746   0.0
H  3.3649092359  -0.1004684864   0.0
H  -3.4041457466  -0.1144254698   0.0
H  -3.3836441609  -2.6218884533   0.0
H  -1.2414382289  -3.8416483581   0.0
H  1.2701350378   3.7683828984    0.0
Core RigidRotor
SymmetryFactor  1.0
End
Frequencies[1/cm]  51
105.6687           126.0675           171.8135
202.2382           339.7239           363.3411
444.6261           455.0156           478.6658
489.7461           543.2679           579.4884
592.6596           627.9893           646.1774
689.5120           703.1422           752.2892
765.5702           798.9627           820.3050
868.9895           886.2369           927.6995
974.4424           989.5170           1022.4014
1053.1950          1089.0520          1165.3628
1188.6548          1197.1373          1239.5904
1263.0605          1343.9982          1359.4477
1399.9266          1454.3466          1466.1515
1509.4071          1585.8509          1625.3259
1653.5401          2205.7135          3158.7792
3163.1490          3170.0666          3180.0092
3182.3132          3195.3574          3477.0847
ZeroEnergy[kcal/mol]  29.35
ElectronicLevels[1/cm]  1
0  2
End
End
!-----
!-----acenaphthyl_i2-----
Well          i2
Species
RRHO
Geometry[angstrom]  19
C  -0.0401167242  -0.3343888995   0.0405278859
C  0.0063103719  -1.7872452727   0.0428599882
C  1.2582320634  -2.486131433    0.0471996818
C  2.4892226909  -1.847633367    0.0497143512

```

|   |               |               |              |
|---|---------------|---------------|--------------|
| C | 2.3181087499  | -0.4571416136 | 0.0465936742 |
| C | 1.2665339039  | 0.1886245544  | 0.0427893678 |
| C | -1.2769779841 | 0.3593921473  | 0.0361678993 |
| C | -2.4488468956 | -0.383612169  | 0.0342251416 |
| C | -2.4229894124 | -1.7875387272 | 0.036384751  |
| C | -1.2293450837 | -2.4780402372 | 0.0405549804 |
| H | 1.2321157702  | -3.5713355205 | 0.0487140499 |
| H | 3.4283396546  | -2.3843114326 | 0.0527780583 |
| H | -3.399641903  | 0.1370565352  | 0.0310376052 |
| H | -3.3594995354 | -2.3335605733 | 0.0346242597 |
| H | -1.2277553981 | -3.5624159349 | 0.0422357178 |
| C | -1.264552382  | 1.8312994256  | 0.0337914838 |
| C | -2.3016593941 | 2.6367533064  | 0.0293138311 |
| H | -0.2623502286 | 2.2772423041  | 0.0359114362 |
| H | -2.4920692637 | 3.6983779075  | 0.0267348367 |

Core RigidRotor

SymmetryFactor 0.5

End

Frequencies[1/cm] 51

|           |           |           |
|-----------|-----------|-----------|
| 72.0879   | 160.3424  | 170.9057  |
| 171.4423  | 252.3447  | 341.6937  |
| 402.0598  | 409.9412  | 452.5020  |
| 467.5367  | 519.8303  | 529.0010  |
| 558.4427  | 579.0052  | 654.4460  |
| 665.3755  | 741.3116  | 742.0290  |
| 769.3223  | 826.7543  | 844.5243  |
| 852.6752  | 865.2394  | 928.4539  |
| 946.4782  | 972.5330  | 988.6501  |
| 1087.2156 | 1111.5344 | 1139.3180 |
| 1193.8569 | 1224.4995 | 1230.7638 |
| 1273.7164 | 1309.9108 | 1336.0541 |
| 1370.8246 | 1424.9611 | 1473.1763 |
| 1518.5610 | 1574.5395 | 1627.0811 |
| 1651.4722 | 2046.7782 | 3012.5853 |
| 3162.2808 | 3166.5387 | 3176.5506 |
| 3188.6626 | 3204.2052 | 3255.0372 |

ZeroEnergy[kcal/mol] 74.37

ElectronicLevels[1/cm] 1

0 2

End

End

!-----

!-----acenaphthyl\_i3-----

Well i3

Species

RRHO

Geometry[angstrom] 19

|   |              |               |     |
|---|--------------|---------------|-----|
| C | 0.0304428489 | -0.6288328041 | 0.0 |
| C | 0.0113882782 | -2.061247495  | 0.0 |
| C | 1.2378177698 | -2.7800171177 | 0.0 |

C 2.4505192937 -2.1226759437 0.0  
 C 2.4051531427 -0.7301057671 0.0  
 C 1.291185988 0.0399976138 0.0  
 C -1.2170146488 0.0812649248 0.0  
 C -2.4086238813 -0.6277081984 0.0  
 C -2.4174371633 -2.0351939026 0.0  
 C -1.236182669 -2.7365421026 0.0  
 C -1.2391622861 1.5075150463 0.0  
 C -1.2621269439 2.7119470079 0.0  
 H 1.2062613045 -3.8651308853 0.0  
 H 3.3869608483 -2.6684274444 0.0  
 H 1.3229689213 1.1233767505 0.0  
 H -3.3436177017 -0.0809288247 0.0  
 H -3.3651696198 -2.5608008769 0.0  
 H -1.2418152927 -3.821291436 0.0  
 H -1.2893811888 3.7738904549 0.0

Core RigidRotor  
 SymmetryFactor 1.0  
 End

Frequencies[1/cm] 51  
 102.5876 137.3277 173.1163  
 206.3585 355.6932 360.6494  
 435.5744 445.5733 480.5900  
 491.1716 551.7720 568.5820  
 587.4727 625.8361 646.3011  
 692.4168 698.2124 749.0005  
 769.4050 791.9603 829.0511  
 862.4413 874.1095 927.1973  
 961.0303 987.3124 1030.6602  
 1053.8638 1094.3499 1149.9527  
 1191.4773 1215.9950 1240.7400  
 1277.2987 1325.8473 1356.3818  
 1386.9402 1446.8879 1472.7911  
 1514.3450 1595.2408 1614.7758  
 1638.2334 2201.4816 3156.9860  
 3165.3539 3178.0216 3181.0678  
 3181.9597 3196.1216 3475.2122

ZeroEnergy[kcal/mol] 28.38  
 ElectronicLevels[1/cm] 1  
 0 2

End  
 End

!-----  
 !-----c2h2\_c10h5\_p1-----  
 Bimolecular p1  
 Fragment c10h5  
 RRHO

Geometry[angstrom] 15  
 C -0.0487577884 1.3542619665 0.0  
 C -0.0061738276 -0.112813919 0.0

```

C 1.2484439964 -0.8033235483 0.0
C 2.4769986136 -0.1586501421 0.0
C 2.3079034105 1.2324871526 0.0
C 1.2540093771 1.8735721328 0.0
C -1.3084658409 1.9404007606 0.0
C -2.495273682 1.2821623162 0.0
C -2.4500607971 -0.1377145729 0.0
C -1.2455727994 -0.8045987489 0.0
H 1.2271110589 -1.8886559438 0.0
H 3.4169855869 -0.6941772612 0.0
H -3.4463037318 1.803189305 0.0
H -3.3801944199 -0.6953428578 0.0
H -1.2342351562 -1.8889146398 0.0
Core RigidRotor
SymmetryFactor 1
End
Frequencies[1/cm] 39
167.1714 197.9686 372.4928
409.0559 426.9181 429.2902
508.9979 515.0208 561.5798
573.5679 695.9853 704.8748
749.4885 791.8887 815.3099
859.7586 892.7443 945.3313
974.5645 1046.0693 1073.4487
1105.4442 1144.6783 1176.7437
1225.6745 1286.0502 1303.4783
1373.7373 1425.0186 1452.3470
1486.3949 1529.3948 1647.3203
2053.9533 3161.0307 3163.9788
3172.1643 3185.0983 3201.9104
ZeroEnergy[kcal/mol] 0.0
ElectronicLevels[1/cm] 1
0 2
End
Fragment c2h2
RRHO
Geometry[angstrom] 4
C 0.0 0.0 0.5990703976
C 0.0 0.0 -0.5990703976
H 0.0 0.0 1.6619081422
H 0.0 0.0 -1.6619081422
Core RigidRotor
SymmetryFactor 2
End
Frequencies[1/cm] 7
642.0679 642.0679 772.6955
772.6955 2069.5209 3420.9273
3523.7963
ZeroEnergy[kcal/mol] 0.0
ElectronicLevels[1/cm] 1

```

```

0 1
End
GroundEnergy[kcal/mol] 116.62
End
!-----acenaphthyl_ts1-----
Barrier      ts1  r1  r2
RRHO
Geometry[angstrom]  19
C  0.5087908702  -0.0485492822  0.0413850346
C  0.2734338046  -0.0179258381  1.4131676388
C  0.5146234656  1.1386476936  -0.7173163293
C  0.2227400135  -1.1477086493  -0.8263692827
C  0.1083636368  2.3877746298  -0.28787245
C  -0.0083124144  -2.3806726531  -0.2114964046
C  -0.0845564804  2.4285365833  1.1443276877
C  -0.0283560052  -2.4284094885  1.1985722432
C  0.0558185499  1.3051152865  1.9536603013
C  0.0667484149  -1.2895260767  2.0053914079
C  0.1137207257  0.897944511  -2.0427827661
C  -0.0097301707  -0.5619427789  -2.1297980148
H  -0.2385322629  -3.2739701377  -0.7815368291
H  -0.3847998176  3.3545663461  1.6265396696
H  -0.2100715584  -3.3835198762  1.6782759684
H  -0.1055198951  1.4061561132  3.0238942436
H  -0.0738871093  -1.3858142154  3.0770116312
H  -0.2644117955  2.2990231658  -1.7959893373
H  -0.2830919715  -1.1193113334  -3.0174924123
Core RigidRotor
SymmetryFactor  0.5
End
Tunneling      Eckart
ImaginaryFrequency[1/cm]  2034.9601
WellDepth[kcal/mol]  100.45
WellDepth[kcal/mol]  104.41
End
Frequencies[1/cm]  50
137.3007          172.9491
214.8533          327.8003          392.4195
418.7264          488.6662          504.4655
526.7878          565.2806          574.1623
621.4360          682.2573          716.7540
757.9489          762.4247          807.3244
822.8810          844.4122          867.1362
919.7835          959.6237          984.1430
1000.2450         1025.8936         1042.8817
1061.0907         1082.2462         1152.5994
1183.5819         1204.6570         1232.9696
1251.6744         1281.8005         1334.8657
1376.5091         1398.3007         1420.0002
1443.6833         1497.2020         1534.8837

```

```

1599.8660          1607.2878          1704.2619
3139.2962          3156.9325          3164.2170
3174.5240          3187.4136          3197.0827
ZeroEnergy[kcal/mol] 104.57
ElectronicLevels[1/cm] 1
0 2
End
!-----
!-----acenaphthyl_ts2-----
Barrier      ts2  r2  r3
RRHO
Geometry[angstrom] 19
C -5.219764E-4  0.0635455789  -0.0253580528
C -6.788874E-4  0.0639719588  1.3809751845
C -8.650319E-4  1.2047187753  -0.8785870336
C -4.43515E-5   -1.107505588   -0.8248845344
C -0.0012015879 2.3787570685   -0.1486372193
C 2.720524E-4   -2.3312756277  -0.192541284
C -0.0013360179 2.4057659656   1.2027833327
C 1.351305E-4   -2.3688080834  1.2303916886
C -0.0011706732 1.3252662453   2.060687805
C -3.202199E-4  -1.2231834073  1.9996098676
C -5.854956E-4  0.7078485759  -2.2556063077
C -9.99163E-5   -0.6539311157  -2.2244469302
H -0.0019710545 3.5445754381   0.4981144652
H 6.239907E-4   -3.2617552039  -0.7507058089
H 4.004984E-4   -3.3345940473  1.7233014139
H -0.0014055112 1.390706225    3.1417661598
H -4.051406E-4  -1.297470693   3.0817980423
H -7.762811E-4  1.3282708025   -3.1403288843
H 2.264735E-4   -1.3071688677  -3.0863459044
Core RigidRotor
SymmetryFactor 0.5
End
Tunneling      Eckart
ImaginaryFrequency[1/cm] 2356.9433
WellDepth[kcal/mol] 63.11
WellDepth[kcal/mol] 63.27
End
Frequencies[1/cm] 50
117.0698          167.8315
215.6303          286.6819          425.4744
431.1124          469.5959          480.6520
504.7287          559.1887          576.1852
614.7243          662.3279          664.2973
688.5281          740.3038          740.6844
772.5622          827.8136          864.9948
876.0601          924.7050          937.2622
981.8874          1021.9148         1043.7621
1079.9922         1102.5602         1121.3079

```

```

1190.9504          1218.9583          1239.4824
1299.2713          1324.5688          1364.0236
1418.3081          1451.6238          1468.4473
1510.7338          1534.1625          1559.0298
1644.7373          1664.6142          2051.5770
3161.5677          3170.7394          3185.1772
3189.5713          3207.3616          3229.1183
ZeroEnergy[kcal/mol] 63.27
ElectronicLevels[1/cm] 1
0 2
End
!-----
!-----acenaphthyl_ts3-----
Barrier      ts3  r3  r4
RRHO
Geometry[angstrom] 19
C 0.0764607947 0.0137860799 0.0210425128
C 0.079135097 -0.0176746232 1.4173300366
C 0.0445497662 1.1912817826 -0.8025671227
C 0.0344867873 -1.1381179477 -0.7927188117
C 0.0114204051 2.4341506178 -0.2145708605
C -0.0205438735 -2.3719084154 -0.1724002989
C 0.179579778 2.4011755249 1.2129633945
C -0.0297312457 -2.4279654934 1.2451392995
C 0.2105766491 1.3092041558 1.9732801301
C 0.0177464444 -1.2894216248 2.034482898
C 0.0063873459 0.7014958124 -2.1913117986
C 0.0022916933 -0.6577731038 -2.1854098072
H -0.1056425093 3.3558591566 -0.7721619284
H -0.0655848804 -3.2937315683 -0.7426128741
H -0.4769899497 2.3638594376 2.3514687736
H -0.0717247073 -3.3996330139 1.7245417282
H 0.0223642197 -1.3682689513 3.1153564254
H -0.0190941501 1.3341575519 -3.0675934445
H -0.0373016648 -1.2943903777 -3.0590932523
Core RigidRotor
SymmetryFactor 0.5
End
Tunneling      Eckart
ImaginaryFrequency[1/cm] 1940.819
WellDepth[kcal/mol] 59.31
WellDepth[kcal/mol] 58.5
End
Frequencies[1/cm] 50
158.2420          209.2210
229.6907          365.6465          387.4228
448.4206          454.1154          470.9328
530.4633          537.8568          576.6762
605.2743          659.9312          669.6251
674.8749          739.8932          776.2644

```



|           |           |           |
|-----------|-----------|-----------|
| 786.9382  | 832.5436  | 846.2537  |
| 892.3878  | 928.8683  | 945.3406  |
| 988.0707  | 1003.7999 | 1037.7466 |
| 1059.3445 | 1087.6455 | 1108.2901 |
| 1185.6886 | 1206.6618 | 1242.1643 |
| 1268.6741 | 1332.1413 | 1353.1776 |
| 1416.6732 | 1454.0631 | 1480.6763 |
| 1514.2185 | 1552.8827 | 1606.4302 |
| 1640.6742 | 1691.9940 | 2152.4347 |
| 3164.4381 | 3177.2329 | 3182.2220 |
| 3190.4041 | 3204.7567 | 3225.5556 |

ZeroEnergy[kcal/mol] 59.31

ElectronicLevels[1/cm] 1

0 2

End

!-----

!-----acenaphthyl\_ts4-----

Barrier ts4 r1 i1

RRHO

Geometry[angstrom] 19

|   |               |               |               |
|---|---------------|---------------|---------------|
| C | -0.4581092763 | -0.01999462   | 0.0913066819  |
| C | -0.5824134776 | -0.0109823064 | 1.5036671314  |
| C | -0.4027821134 | 1.1925347701  | -0.6617768059 |
| C | -0.3875222445 | -1.2378710273 | -0.5928938258 |
| C | -0.4712070366 | 2.4022874583  | -0.0107382053 |
| C | -0.4315333862 | -2.4472585405 | 0.0281195257  |
| C | -0.5955559795 | 2.4205847197  | 1.4017978084  |
| C | -0.556372569  | -2.4435321769 | 1.4502677128  |
| C | -0.6499136415 | 1.2592742634  | 2.1407742915  |
| C | -0.6294483901 | -1.2684845361 | 2.1651270124  |
| H | -0.4309605009 | 3.3317242673  | -0.5656266143 |
| H | -0.3762934551 | -3.3875511171 | -0.5089403171 |
| H | -0.6488303721 | 3.3776761768  | 1.9081035649  |
| H | -0.5938315199 | -3.3943754319 | 1.9716325469  |
| H | -0.7452847822 | 1.3057229267  | 3.2205986007  |
| H | -0.7241207193 | -1.2957467997 | 3.245406825   |
| C | -0.2772093983 | 0.8644853314  | -2.0575212155 |
| C | -0.2128940075 | -0.2128536704 | -2.6713805972 |
| H | -0.13397413   | -0.8816246873 | -3.4988531205 |

Core RigidRotor

SymmetryFactor 0.5

End

Tunneling Eckart

ImaginaryFrequency[1/cm] 439.3123

WellDepth[kcal/mol] 40.69

WellDepth[kcal/mol] 15.46

End

Frequencies[1/cm] 50

|          |          |          |
|----------|----------|----------|
| 162.4185 | 166.0560 |          |
| 198.1064 | 351.6216 | 403.3921 |

|           |           |           |
|-----------|-----------|-----------|
| 453.5575  | 464.7149  | 481.6486  |
| 497.1026  | 543.9695  | 582.6755  |
| 585.0480  | 625.5706  | 636.4377  |
| 699.9409  | 741.0525  | 757.2322  |
| 770.7830  | 801.6895  | 819.8283  |
| 880.6909  | 893.5021  | 922.4709  |
| 973.4753  | 987.5260  | 1024.5476 |
| 1048.7610 | 1070.1379 | 1163.9178 |
| 1192.7981 | 1203.8986 | 1237.5309 |
| 1253.6965 | 1350.0144 | 1386.0636 |
| 1412.7465 | 1450.4093 | 1456.6037 |
| 1510.3286 | 1589.3614 | 1633.8986 |
| 1651.1918 | 1899.7646 | 3156.7080 |
| 3162.6953 | 3171.0942 | 3179.4200 |
| 3180.7053 | 3194.3664 | 3413.9347 |

ZeroEnergy[kcal/mol] 44.81

ElectronicLevels[1/cm] 1

0 2

End

!-----

!-----acenaphthyl\_ts5-----

Barrier ts5 r2 i2

RRHO

Geometry[angstrom] 19

|   |               |               |               |
|---|---------------|---------------|---------------|
| C | -0.0012340598 | 0.2487451677  | -0.0531284689 |
| C | -0.0241217675 | 0.1234395233  | 1.396132199   |
| C | -0.0517332264 | 1.6055774373  | -0.4119630101 |
| C | 0.0628855766  | -0.8981163554 | -0.879782205  |
| C | -0.1035175675 | 2.5813708309  | 0.3409014908  |
| C | 0.1033473151  | -2.1450598397 | -0.2865870632 |
| C | -0.1316866322 | 2.5795445257  | 1.7432872545  |
| C | 0.084525806   | -2.2870993793 | 1.1160549807  |
| C | -0.0872228014 | 1.2836373834  | 2.2355050502  |
| C | 0.0212806892  | -1.1852473595 | 1.9376779296  |
| C | 1.1086324797  | -0.5325414025 | -3.1063756277 |
| C | 0.0513361801  | -0.743363604  | -2.3667977707 |
| H | 0.155794308   | -3.0282240659 | -0.9130103101 |
| H | -0.1772390027 | 3.4475674349  | 2.3876951627  |
| H | 0.1223403426  | -3.2809108912 | 1.5474271891  |
| H | -0.098320032  | 1.1301501301  | 3.3101571955  |
| H | 0.0061463953  | -1.3099521545 | 3.0149223826  |
| H | 1.3387074028  | -0.3857043619 | -4.1511835224 |
| H | -0.9331084059 | -0.8067490195 | -2.8478158569 |

Core RigidRotor

SymmetryFactor 0.5

End

Tunneling Eckart

ImaginaryFrequency[1/cm] 127.9651

WellDepth[kcal/mol] 78.3

WellDepth[kcal/mol] 4.09

```

End
Frequencies[1/cm] 50
113.9393      168.1807
196.7696      212.3188      341.9112
398.2903      420.7841      446.0364
459.7540      498.0721      523.8359
545.1052      623.7793      636.9352
679.7055      740.8006      745.1895
770.2531      820.6279      833.4588
847.5044      874.5960      928.2950
947.0255      986.0956      991.7875
1080.5476     1112.9235     1141.0282
1192.3756     1225.8337     1238.1257
1251.7302     1299.4997     1333.7106
1367.8084     1425.8203     1471.0770
1521.8028     1576.4658     1631.6071
1671.7279     2054.9570     3004.2525
3160.8026     3165.0754     3175.5951
3188.5428     3199.2447     3239.2421
ZeroEnergy[kcal/mol] 78.46
ElectronicLevels[1/cm] 1
0 2
End
!-----
!-----acenaphthyl_ts6-----
Barrier      ts6  i2  i3
RRHO
Geometry[angstrom] 19
C  -0.1380813398  -0.4688925405  0.0602027452
C  -0.0391197322  -1.8873089325  0.0476452421
C   1.2643121491  -2.4722048327  0.0492472433
C   2.4114614126  -1.6927305545  0.0627586527
C   2.1945869379  -0.3012961255  0.074589684
C   1.0524866041  0.2778402943  0.0738362871
C  -1.3652510105  0.2236852238  0.0599050912
C  -2.5416777645  -0.4982346416  0.0470327244
C  -2.4736998335  -1.911669606  0.0344126146
C  -1.2711790804  -2.5934690133  0.0345211532
H   1.3571279995  -3.5536501337  0.0395946226
H   3.3953760066  -2.1463338831  0.0637922633
H  -3.502987982  0.0010547897  0.0465173574
H  -3.4000383173  -2.4750662176  0.0243339161
H  -1.2658238351  -3.678213208  0.0246039702
C  -1.1278479367  1.673781449  0.0742000791
C  -1.7705864039  2.7648086842  0.0792726047
H   0.1297652439  1.6618387587  0.0811294357
H  -1.8645171178  3.8296594891  0.0872303131
Core RigidRotor
SymmetryFactor 1.0
End

```

```

Tunneling      Eckart
ImaginaryFrequency[1/cm]  1538.8938
WellDepth[kcal/mol]  13.97
WellDepth[kcal/mol]  59.96
End
Frequencies[1/cm]  50
113.7020          171.8118
226.9024          229.4351          346.7337
380.8078          420.5834          467.2336
487.2996          502.7867          528.4533
557.6358          565.2911          611.4008
639.9610          664.4546          718.1782
754.8171          769.6486          771.3952
833.2270          867.6980          910.2201
931.5847          955.4747          984.8251
995.4392          1067.0995         1104.1858
1145.8064         1189.3677         1236.7653
1249.4382         1317.2636         1367.2780
1381.3368         1424.9051         1484.7963
1500.6268         1555.8542         1578.9264
1645.7058         1767.1763         1825.0658
3161.0237         3164.0025         3178.9132
3184.1410         3192.7984         3381.2580
ZeroEnergy[kcal/mol]  88.34
ElectronicLevels[1/cm]  1
0 2
End
!-----
!-----acenaphthyl_ts7-----
Barrier      ts7  i2  p1
RRHO
Geometry[angstrom]  19
C  -0.298853125  -0.2323869543  0.1009401229
C  -0.1005111251  -1.6827560222  0.0913161248
C  1.1789046284  -2.2461187592  0.4036896352
C  2.2895607785  -1.4826114682  0.7282025411
C  1.9897749575  -0.1111006975  0.7077989089
C  0.8991093884  0.4102400737  0.443261013
C  -1.5668623106  0.2423851899  -0.2122114776
C  -2.6340927211  -0.5396160641  -0.5261100735
C  -2.4455043592  -1.9470626125  -0.5364726434
C  -1.2185430376  -2.4939886325  -0.2371811802
H  1.2730598079  -3.3273543191  0.3823957252
H  3.2497112965  -1.9238457709  0.9618373664
H  -3.6069875176  -0.1211760694  -0.7640665783
H  -3.2819007408  -2.5919111582  -0.7838412519
H  -1.0932071837  -3.571090588  -0.2501035251
C  -1.6879968812  2.663230424  -0.1409523699
C  -0.5971656951  3.0889405126  0.1638404285
H  -2.7124223727  2.5744943892  -0.4139778998

```

```

H 0.3915592125 3.3691845269 0.4357561339
Core RigidRotor
SymmetryFactor 0.5
End
Tunneling Eckart
ImaginaryFrequency[1/cm] 227.7052
WellDepth[kcal/mol] 43.53
WellDepth[kcal/mol] 1.28
End
Frequencies[1/cm] 50
44.3920 65.8807
69.2015 167.1660 199.4051
224.9429 380.5807 410.9002
434.1061 449.0144 493.9640
519.9857 540.2121 576.2710
601.8366 641.3494 687.9119
710.4687 744.7914 752.1263
760.8721 806.8362 815.3111
859.9125 889.4000 945.0353
972.4339 1048.8432 1073.2010
1103.1327 1147.2727 1180.9789
1224.8988 1291.4014 1308.3801
1375.5751 1424.3391 1452.9435
1486.7056 1530.2517 1646.0167
1970.4795 1993.0126 3151.5940
3161.2468 3166.3798 3181.9282
3197.1505 3410.4226 3500.3220
ZeroEnergy[kcal/mol] 117.90
ElectronicLevels[1/cm] 1
0 2
End
!-----
!-----acenaphthyl_ts8-----
Barrier ts8 i1 i3
RRHO
Geometry[angstrom] 19
C -0.0010464004 -0.5551444447 -0.099946363
C 0.0114827289 -1.986492504 -0.070376564
C 1.2609891202 -2.6996196248 -0.0200575585
C 2.4760248336 -2.0674458618 0.0029004484
C 2.4235600413 -0.6549161912 -0.2062838975
C 1.2921007215 0.0353317534 -0.2536598791
C -1.233161449 0.1499746655 -0.0210038313
C -2.4212484671 -0.5721159431 0.0456132562
C -2.4122019967 -1.9753076936 0.0297981532
C -1.223727794 -2.6730007695 -0.027793924
C -1.2505656446 1.5755166078 -0.0202241568
C -1.2810406987 2.7789448268 -0.0144623384
H 1.214401054 -3.7837074304 0.0344293333
H 3.4028718772 -2.6130851374 0.1296837818

```

```

H 2.3256370004 0.5003209172 0.4105306728
H -3.3608004138 -0.0362744414 0.1009508083
H -3.353388598 -2.5114593642 0.070248792
H -1.2253790067 -3.7578553291 -0.0251972465
H -1.2999719081 3.8410389646 -0.0151494867
Core RigidRotor
SymmetryFactor 0.5
End
Tunneling Eckart
ImaginaryFrequency[1/cm] 1957.7983
WellDepth[kcal/mol] 59.85
WellDepth[kcal/mol] 60.82
End
Frequencies[1/cm] 50
104.6569 127.8711
167.8444 199.0486 334.4684
361.9788 405.0088 451.3533
458.3418 468.9576 490.8846
539.5496 580.7284 590.3138
638.0075 653.7278 678.7252
688.8987 764.0879 770.3619
784.9060 842.9337 850.3003
929.2673 976.8321 988.3076
992.9736 1059.2877 1092.8371
1161.9047 1195.1661 1225.9012
1263.8383 1267.8991 1346.1594
1389.7266 1424.9093 1483.9313
1517.7100 1594.0600 1620.3188
1712.6741 2157.1504 2208.4772
3149.7423 3164.5601 3180.9248
3189.4391 3196.2711 3477.6812
ZeroEnergy[kcal/mol] 89.20
ElectronicLevels[1/cm] 1
0 2
End
!-----
End

```

## Input file for MESS calculations for pyrenyl C<sub>16</sub>H<sub>9</sub>

```
TemperatureList[K]          500. 600. 700. 800. 900. 1000. 1125.
1250. 1375. 1500. 1650. 1800. 2000. 2250. 2500.
PressureList[atm]          0.03947368 1. 10. 100.
EnergyStepOverTemperature  0.2          #Ratio of discretization
energy step to T
ExcessEnergyOverTemperature 100
ModelEnergyLimit[kcal/mol] 800
WellCutoff                 10
ChemicalEigenvalueMax     0.2
ChemicalEigenvalueMin     1.e-6          #only for direct
diagonalization method
CalculationMethod          direct
EigenvalueOutput           eigenvalue.out
Reactant                   #ground energy of bimolecular species will be used as a
reference.
Model
  EnergyRelaxation
    Exponential
      Factor[1/cm]         424      ! Jasper calc N2
      Power                0.62
      ExponentCutoff       15
    End
  CollisionFrequency
    LennardJones
      Epsilons[1/cm]      101.5  834.9  ! N2 pyrene-Frenklach
      Sigmas[angstrom]    3.6154  7.24  ! N2 pyrene-Frenklach
      Masses[amu]         28.   203.
    End
  OutputTemperatureStep[K] 100
  OutputTemperatureSize   20
  OutputReferenceEnergy[kcal/mol] 0.
  Well                    pyr1 # pyr1
  Species
    RRHO
      Geometry[angstrom]  25
C -2.8293761222 -1.2065335493 0.
C -1.4271332095 -1.227846425 0.
C -0.7136987279 0.0079990604 0.
C -1.4372243567 1.2399577044 0.
C -2.8376573021 1.2109573929 0.
C -3.5221882777 -0.0009882164 0.
C 0.7132604721 0.0006593923 0.
C 1.4443043271 1.2348253215 0.
C 0.6484660276 2.4061757077 0.
C -0.6885964848 2.47936499 0.
C -0.6795657824 -2.454527866 0.
C 0.6784922683 -2.4580839194 0.
C 1.4284689677 -1.2330561538 0.
```

```

C 2.8306248588 -1.2078488057 0.
C 3.5254472596 -0.0023886817 0.
C 2.8452300865 1.2112998378 0.
H -3.3719416009 -2.1458892708 0.
H -3.386510486 2.1465455112 0.
H -4.6065237795 -0.0040643845 0.
H -1.2251754646 3.423077232 0.
H -1.2288413689 -3.3902324065 0.
H 1.2247140653 -3.3956582682 0.
H 3.3739612885 -2.146847526 0.
H 4.609589003 -0.0083971531 0.
H 3.3879853387 2.1489414764 0.
  Core RigidRotor
  SymmetryFactor 1
  End
  Frequencies[1/cm] 69
    96.9223 151.6968 217.4529
    247.1686 260.9874 355.3444
    397.1868 407.4517 461.5248
    485.5974 504.2874 507.1622
    516.8146 550.4680 552.1204
    582.1549 596.7204 663.3012
    700.4377 726.9564 741.8096
    765.4403 782.6726 809.9931
    820.7758 826.8848 837.8492
    860.8493 906.5237 917.0637
    976.4228 976.6329 984.1501
    990.1959 1011.9907 1088.7748
    1108.7237 1113.5338 1166.3300
    1184.6300 1197.6340 1219.1252
    1230.2505 1252.6396 1262.3681
    1312.9131 1342.4714 1365.8114
    1391.5694 1424.5287 1444.9749
    1451.6513 1455.9598 1516.2112
    1529.0852 1594.8510 1608.6617
    1630.3907 1642.4817 1660.9135
    3155.3034 3157.0621 3160.5860
    3162.7907 3169.2115 3175.8583
    3177.7073 3184.5889 3192.1812
  ZeroEnergy[kcal/mol] 0.2
  ElectronicLevels[1/cm] 1
    0 2
  End
  End
  Well pyr2 # pyr2
  Species
  RRHO
  Geometry[angstrom] 25
C 2.742448 -1.303944 -0.0
C 1.340799 -1.270342 -0.0

```



|   |           |           |      |
|---|-----------|-----------|------|
| C | 0.681175  | -0.005311 | -0.0 |
| C | 1.447233  | 1.198317  | 0.0  |
| C | 2.846490  | 1.111687  | 0.0  |
| C | 3.482512  | -0.125804 | 0.0  |
| C | -0.741697 | 0.053554  | -0.0 |
| C | -1.397162 | 1.329511  | -0.0 |
| C | 0.539928  | -2.462702 | -0.0 |
| C | -0.817100 | -2.404298 | -0.0 |
| C | -1.513876 | -1.147508 | 0.0  |
| C | -2.914868 | -1.071034 | 0.0  |
| C | -3.566440 | 0.167904  | 0.0  |
| C | -2.779587 | 1.291498  | 0.0  |
| H | 3.248314  | -2.263623 | -0.0 |
| H | 3.432670  | 2.024457  | 0.0  |
| H | 4.565757  | -0.172522 | 0.0  |
| H | 1.046173  | -3.422252 | -0.0 |
| H | -1.403806 | -3.316948 | -0.0 |
| H | -3.498313 | -1.986246 | 0.0  |
| H | -4.649343 | 0.224259  | 0.0  |
| C | -0.601283 | 2.524839  | -0.0 |
| C | 0.755313  | 2.457674  | -0.0 |
| H | -1.110950 | 3.481032  | -0.0 |
| H | 1.346176  | 3.367595  | -0.0 |

Core RigidRotor

SymmetryFactor 1

End

Frequencies[1/cm] 69

|           |           |           |
|-----------|-----------|-----------|
| 98.1047   | 154.3538  | 211.0769  |
| 252.3144  | 259.7625  | 361.4225  |
| 406.0632  | 410.7827  | 462.2890  |
| 485.9760  | 501.6923  | 510.2935  |
| 514.4748  | 538.8922  | 551.8566  |
| 572.2429  | 596.4491  | 684.8786  |
| 700.0267  | 714.5526  | 744.8815  |
| 764.4403  | 782.8291  | 802.8498  |
| 821.9377  | 831.3428  | 836.5110  |
| 855.9252  | 910.0799  | 940.3117  |
| 971.9682  | 977.4787  | 982.1570  |
| 990.3947  | 1005.3817 | 1095.6105 |
| 1117.7055 | 1135.0311 | 1163.9011 |
| 1175.8280 | 1197.1216 | 1205.6575 |
| 1239.7491 | 1259.3853 | 1266.5174 |
| 1325.3918 | 1334.5850 | 1386.6532 |
| 1399.5450 | 1422.3930 | 1440.1092 |
| 1450.0664 | 1469.6300 | 1486.1255 |
| 1525.8426 | 1585.1100 | 1604.5764 |
| 1629.7949 | 1640.6447 | 1665.1913 |
| 3156.7831 | 3159.0565 | 3160.2547 |
| 3163.8735 | 3168.8002 | 3175.1647 |
| 3177.2141 | 3184.9132 | 3188.8180 |

```

ZeroEnergy[kcal/mol]          0.6
ElectronicLevels[1/cm]      1
    0  2
End
End
Well      pyr3 # pyr3
Species
RRHO
    Geometry[angstrom]      25
C -2.7789294925 -1.187789014 0.
C -1.376692435 -1.1993176254 0.
C -0.6726190631 0.0413145942 0.
C -1.4016976495 1.2675591447 0.
C -2.8031031614 1.2275442117 0.
C -3.481159067 0.0128709962 0.
C 0.7532517573 0.0556959601 0.
C 1.4500843286 1.3030386644 0.
C 0.6885846547 2.5204612467 0.
C -0.6696348468 2.5027183542 0.
C -0.6200709617 -2.4193257591 0.
C 0.7383339546 -2.409719815 0.
C 1.4745769549 -1.1772292662 0.
C 2.885823156 -1.1478373664 0.
C 3.4888500614 0.0830883937 0.
C 2.8604662869 1.3019492939 0.
H -3.3144919713 -2.1311688199 0.
H -3.3580318411 2.1597014857 0.
H -4.5652411039 0.0021801174 0.
H 1.2255459626 3.4629904595 0.
H -1.2289126995 3.4324518384 0.
H -1.1604185299 -3.360208792 0.
H 1.2945018575 -3.3410374821 0.
H 3.4504392677 -2.0740477539 0.
H 3.4070315804 2.239026933 0.
    Core RigidRotor
    SymmetryFactor          1
    End
    Frequencies[1/cm]      69
100.9611          149.9303          214.4928
244.9302          271.7799          362.4372
393.2100          413.3439          460.8665
494.9190          504.6772          507.8689
515.7089          526.3619          550.1192
565.7222          594.7570          673.9236
697.1454          713.8679          751.5820
764.6863          798.0538          800.3010
800.5081          832.0940          842.2496
865.2133          867.5033          912.4985
976.3291          979.7803          984.3364
988.8318          1007.6456         1084.8090

```

|           |           |           |
|-----------|-----------|-----------|
| 1105.6248 | 1130.0137 | 1165.7153 |
| 1166.8176 | 1201.2425 | 1207.7484 |
| 1250.1620 | 1253.6515 | 1266.6504 |
| 1319.4899 | 1344.6445 | 1371.7052 |
| 1413.8117 | 1415.0886 | 1443.8938 |
| 1448.7105 | 1476.3372 | 1501.1295 |
| 1527.9445 | 1544.5178 | 1618.7269 |
| 1620.1164 | 1646.3184 | 1665.1793 |
| 3158.1939 | 3158.4234 | 3161.2432 |
| 3164.2951 | 3165.8856 | 3168.7876 |
| 3177.4120 | 3177.6825 | 3185.8037 |

ZeroEnergy[kcal/mol] 0.0

ElectronicLevels[1/cm] 1

0 2

End

End

Well i1 # i1

Species

RRHO

Geometry[angstrom] 25

|   |               |               |    |
|---|---------------|---------------|----|
| C | 2.8720490145  | -1.5064626125 | 0. |
| C | 1.4591008137  | -1.4939694575 | 0. |
| C | 0.7675139571  | -0.2397672045 | 0. |
| C | 1.5788432304  | 0.8905031274  | 0. |
| C | 2.9405369083  | 0.9121887587  | 0. |
| C | 3.6043485987  | -0.3363368315 | 0. |
| C | -0.6792924169 | -0.209032863  | 0. |
| C | -1.4264293073 | 1.0071417222  | 0. |
| C | 0.6950671439  | -2.7060155877 | 0. |
| C | -0.6615443033 | -2.6789368398 | 0. |
| C | -1.3894321445 | -1.4418644076 | 0. |
| C | -2.7999458733 | -1.4405095651 | 0. |
| C | -3.5058796803 | -0.2557922327 | 0. |
| C | -2.8205860258 | 0.9634169564  | 0. |
| C | -0.8000144298 | 2.2899297631  | 0. |
| C | -0.3792583254 | 3.4203105808  | 0. |
| H | 3.381084497   | -2.4643621104 | 0. |
| H | 3.5028284195  | 1.8398192105  | 0. |
| H | 4.6887264582  | -0.369344577  | 0. |
| H | 1.2266642425  | -3.6519496964 | 0. |
| H | -1.2285352897 | -3.6037925666 | 0. |
| H | -3.3223988872 | -2.3911614192 | 0. |
| H | -4.5896002126 | -0.2623621413 | 0. |
| H | -3.3693324031 | 1.8970249749  | 0. |
| H | 0.0310070156  | 4.4000560187  | 0. |

Core RigidRotor

SymmetryFactor 1

End

Frequencies[1/cm] 69

|         |          |          |
|---------|----------|----------|
| 60.4542 | 106.0521 | 133.6960 |
|---------|----------|----------|

|           |           |           |
|-----------|-----------|-----------|
| 153.3281  | 212.8789  | 226.0283  |
| 248.5844  | 374.6357  | 377.3653  |
| 410.9389  | 430.0401  | 489.3215  |
| 501.5688  | 510.3718  | 533.8078  |
| 544.6358  | 570.1415  | 584.1235  |
| 624.1625  | 642.0509  | 666.8631  |
| 675.2802  | 712.8282  | 722.5486  |
| 754.8459  | 777.0242  | 800.1124  |
| 814.8753  | 842.4180  | 849.3153  |
| 889.2925  | 925.1853  | 969.3047  |
| 979.1880  | 988.0391  | 993.7410  |
| 1014.8094 | 1064.1567 | 1105.4421 |
| 1143.0927 | 1172.0539 | 1188.5011 |
| 1192.9347 | 1230.1950 | 1253.2456 |
| 1264.5359 | 1308.6172 | 1341.4636 |
| 1356.5782 | 1410.1542 | 1432.6525 |
| 1447.2956 | 1469.8390 | 1510.0695 |
| 1523.7958 | 1587.3554 | 1623.7507 |
| 1644.8137 | 1653.9107 | 2188.2231 |
| 3155.9601 | 3157.6392 | 3165.2809 |
| 3166.6062 | 3176.2281 | 3180.4115 |
| 3182.2759 | 3197.3882 | 3477.0915 |

ZeroEnergy[kcal/mol] 50.6

ElectronicLevels[1/cm] 1

0 2

End

End

Well i2 # i2

Species

RRHO

Geometry[angstrom] 25

|   |               |               |    |
|---|---------------|---------------|----|
| C | 2.6788137076  | 1.1259509632  | 0. |
| C | 1.2604822685  | 1.2112907944  | 0. |
| C | 0.4988823293  | 0.0026141284  | 0. |
| C | 1.17347827    | -1.256066726  | 0. |
| C | 2.5613205379  | -1.2853275836 | 0. |
| C | 3.3117158229  | -0.0952853559 | 0. |
| C | -0.9363514462 | 0.0590765347  | 0. |
| C | -1.7186513404 | -1.1829295516 | 0. |
| C | -0.9748305016 | -2.4268204623 | 0. |
| C | 0.3746403024  | -2.4635768198 | 0. |
| C | 0.5897042068  | 2.4610669375  | 0. |
| C | -0.7926892017 | 2.5195831678  | 0. |
| C | -1.4813611009 | 1.3176819314  | 0. |
| C | -4.7454057381 | 0.8049201206  | 0. |
| C | -3.9459169938 | -0.1030202434 | 0. |
| C | -3.0878602355 | -1.216135004  | 0. |
| H | 3.2564803665  | 2.0439555311  | 0. |
| H | 3.0710452331  | -2.2431451537 | 0. |
| H | 4.3945258902  | -0.1460064573 | 0. |

```

H -1.543827894 -3.3503597379 0.
H 0.8935525513 -3.4164727631 0.
H 1.176346656 3.3743755745 0.
H -1.3126173768 3.4713178165 0.
H -5.4264597494 1.6197864499 0.
H -3.5711915642 -2.1889960915 0.
  Core RigidRotor
  SymmetryFactor 1
  End
  Frequencies[1/cm] 69
  47.6178 102.3428 137.2050
  172.0542 197.7887 237.1399
  251.8347 347.0020 358.3223
  442.6540 455.7713 466.4439
  473.2978 492.9545 508.0194
  537.7519 539.9544 594.4125
  598.9372 610.8981 643.4180
  664.9495 683.8995 759.7479
  762.9936 783.1776 786.6634
  788.6896 825.9580 838.4887
  855.4433 912.2468 955.4846
  975.7191 980.8450 990.2904
  1052.0515 1058.0338 1105.5972
  1139.7934 1147.3402 1182.5831
  1203.0915 1232.9535 1244.5018
  1260.5690 1324.5343 1357.2096
  1384.1588 1412.2210 1432.7334
  1455.6272 1479.4171 1509.2980
  1565.1970 1586.4176 1619.0329
  1628.7333 1660.4197 2164.6779
  3145.7240 3157.1436 3158.8694
  3161.5740 3169.0721 3174.6564
  3178.3205 3187.0200 3477.2396
  ZeroEnergy[kcal/mol] 63.3
  ElectronicLevels[1/cm] 1
  0 2
  End
  End
  Well i3 # i3
  Species
  RRHO
  Geometry[angstrom] 25
  C 2.168886 -2.007671 -0.0
  C 0.832316 -1.559970 0.0
  C 0.551162 -0.159477 0.0
  C 1.643219 0.763551 0.0
  C 2.943813 0.267622 0.0
  C 3.210390 -1.104116 -0.0
  C -0.833992 0.238650 0.0
  C -1.397446 1.513171 -0.0

```

|                        |           |           |      |
|------------------------|-----------|-----------|------|
| C                      | -0.243256 | -2.507284 | -0.0 |
| C                      | -1.544819 | -2.120922 | -0.0 |
| C                      | -1.904127 | -0.734169 | 0.0  |
| C                      | -3.271937 | -0.334017 | -0.0 |
| C                      | -3.684712 | 0.996405  | -0.0 |
| C                      | -2.587619 | 1.862466  | -0.0 |
| H                      | 2.363347  | -3.074643 | -0.0 |
| H                      | 3.763923  | 0.976565  | 0.0  |
| H                      | 4.237140  | -1.451983 | -0.0 |
| H                      | 0.010933  | -3.561788 | -0.0 |
| H                      | -2.335456 | -2.863040 | -0.0 |
| H                      | -4.025639 | -1.115398 | -0.0 |
| H                      | -4.728672 | 1.281760  | -0.0 |
| C                      | 2.344971  | 3.164542  | -0.0 |
| C                      | 1.431943  | 2.222114  | 0.0  |
| H                      | 2.377246  | 4.242803  | -0.0 |
| H                      | 0.384427  | 2.560364  | 0.0  |
| Core RigidRotor        |           |           |      |
| SymmetryFactor         |           | 1         |      |
| End                    |           |           |      |
| Frequencies[1/cm]      |           | 69        |      |
| 31.8801                | 77.3079   | 114.5381  |      |
| 147.1615               | 187.6593  | 238.4967  |      |
| 275.4204               | 275.6735  | 363.3435  |      |
| 403.0475               | 418.3284  | 464.2994  |      |
| 464.4270               | 480.1403  | 520.8721  |      |
| 526.8741               | 559.0602  | 559.9119  |      |
| 586.6323               | 644.5122  | 653.5566  |      |
| 681.9443               | 697.6663  | 773.2252  |      |
| 774.2899               | 774.8068  | 798.7057  |      |
| 816.6861               | 842.0186  | 857.9403  |      |
| 864.0536               | 928.8674  | 944.9455  |      |
| 959.2933               | 978.8780  | 991.2089  |      |
| 1013.4984              | 1091.4138 | 1112.3543 |      |
| 1138.9168              | 1168.2226 | 1193.4834 |      |
| 1217.5708              | 1229.3182 | 1243.7831 |      |
| 1277.5435              | 1290.4378 | 1324.5513 |      |
| 1352.2416              | 1396.4750 | 1425.7183 |      |
| 1437.5655              | 1459.6671 | 1489.5381 |      |
| 1537.1230              | 1577.4783 | 1630.0485 |      |
| 1641.4518              | 1652.6691 | 1966.4515 |      |
| 2906.0862              | 3160.0989 | 3163.2264 |      |
| 3164.9642              | 3174.5373 | 3181.3293 |      |
| 3187.9357              | 3196.0937 | 3253.1900 |      |
| ZeroEnergy[kcal/mol]   |           | 98.1      |      |
| ElectronicLevels[1/cm] |           | 1         |      |
| 0                      | 2         |           |      |
| End                    |           |           |      |
| End                    |           |           |      |
| Well                   | i4        | # i4      |      |

## Species

RRHO

Geometry[angstrom] 25

C 3.0732447159 1.0545182404 0.  
C 1.6904806067 1.1584724323 0.  
C 0.8905067821 -0.0300724741 0.  
C 1.544249542 -1.3002685653 0.  
C 2.9617257023 -1.3547566276 0.  
C 3.7085168571 -0.2004197832 0.  
C -0.5349923372 0.0468615726 0.  
C -1.2787109981 -1.1437755773 0.  
C -0.6129760325 -2.3983798188 0.  
C 0.7538202624 -2.4759233679 0.  
C 1.027654151 2.4467176031 0.  
C -0.3129887831 2.5530963972 0.  
C -1.1854747135 1.3758617552 0.  
C -2.5108756737 1.5343546876 0.  
C -3.9021608222 -1.2863505509 0.  
C -2.7019484732 -1.1537189041 0.  
H 3.6708810224 1.9598422157 0.  
H 3.4457169754 -2.3253267218 0.  
H 4.7914203596 -0.2522631157 0.  
H -1.2160067043 -3.2979537749 0.  
H 1.2460264305 -3.4422816569 0.  
H 1.6472708154 3.3376385139 0.  
H -0.7897280712 3.5263836728 0.  
H -3.1738495565 2.3874215133 0.  
H -4.9622780577 -1.3535156656 0.

Core RigidRotor

SymmetryFactor 1

End

Frequencies[1/cm] 69

|           |           |           |
|-----------|-----------|-----------|
| 66.4750   | 86.1367   | 144.5852  |
| 177.2857  | 206.8182  | 232.7042  |
| 264.5294  | 332.6827  | 378.3113  |
| 412.6786  | 422.2884  | 426.7874  |
| 474.9499  | 497.4186  | 527.1147  |
| 528.5952  | 553.3363  | 566.2199  |
| 602.5303  | 620.6973  | 634.2468  |
| 666.4789  | 681.6557  | 701.1790  |
| 709.2720  | 746.7574  | 766.9913  |
| 806.0464  | 813.7459  | 819.7204  |
| 852.8903  | 853.6462  | 908.8157  |
| 937.1141  | 971.0301  | 972.1800  |
| 980.1680  | 988.9281  | 1093.3098 |
| 1121.6305 | 1153.4650 | 1182.9310 |
| 1200.5845 | 1221.3755 | 1252.0237 |
| 1260.8171 | 1280.6508 | 1368.2082 |
| 1372.9156 | 1397.4115 | 1426.2649 |
| 1465.9284 | 1468.3763 | 1528.9487 |

|           |           |           |
|-----------|-----------|-----------|
| 1549.9358 | 1604.3483 | 1626.7888 |
| 1632.3578 | 1666.8754 | 2177.9990 |
| 3158.2428 | 3161.7184 | 3168.7369 |
| 3171.1360 | 3184.1152 | 3186.4751 |
| 3194.2305 | 3229.3695 | 3475.6767 |

ZeroEnergy[kcal/mol] 65.7

ElectronicLevels[1/cm] 1

0 2

End

End

Well i5 # i5

Species

RRHO

Geometry[angstrom] 25

|   |               |               |    |
|---|---------------|---------------|----|
| C | 2.8185565168  | -1.8810383217 | 0. |
| C | 1.4047692148  | -1.8796399112 | 0. |
| C | 0.6717765652  | -0.6492083138 | 0. |
| C | 1.4392376967  | 0.5508472548  | 0. |
| C | 2.7955765202  | 0.4588722238  | 0. |
| C | 3.5457374268  | -0.7033516488 | 0. |
| C | -0.7905376571 | -0.6865280733 | 0. |
| C | -1.6573502802 | 0.4589788484  | 0. |
| C | 0.7083011061  | -3.1294966822 | 0. |
| C | -0.6434533632 | -3.1700383219 | 0. |
| C | -1.4256514187 | -1.9693359568 | 0. |
| C | -2.8312421888 | -2.085803845  | 0. |
| C | -3.6369806492 | -0.9708459415 | 0. |
| C | -3.0454019175 | 0.2922344372  | 0. |
| C | -1.2411830363 | 1.8277597181  | 0. |
| C | -1.0327125894 | 3.0148189918  | 0. |
| H | 3.3341665613  | -2.836533034  | 0. |
| H | 0.9536426876  | 1.5132286227  | 0. |
| H | 4.6294932628  | -0.7045332715 | 0. |
| H | 1.2898129514  | -4.0451430634 | 0. |
| H | -1.1685690057 | -4.1189225938 | 0. |
| H | -3.2658295968 | -3.0795041404 | 0. |
| H | -4.7165760532 | -1.064144343  | 0. |
| H | -3.6641175567 | 1.1807555372  | 0. |
| H | -0.8136991969 | 4.0544518282  | 0. |

Core RigidRotor

SymmetryFactor 1

End

Frequencies[1/cm] 69

|          |          |          |
|----------|----------|----------|
| 28.2114  | 92.4583  | 152.9392 |
| 167.7202 | 232.9919 | 243.4794 |
| 255.3457 | 370.4696 | 375.3082 |
| 405.0002 | 411.2864 | 492.4621 |
| 508.1461 | 515.8477 | 517.2003 |
| 549.0583 | 572.7216 | 593.3622 |
| 621.6078 | 637.1267 | 667.9206 |



|           |           |           |
|-----------|-----------|-----------|
| 686.9503  | 712.5901  | 724.7751  |
| 768.9295  | 775.5067  | 799.1155  |
| 819.3139  | 838.2112  | 848.7738  |
| 871.3654  | 927.6383  | 952.5628  |
| 978.2979  | 989.6077  | 995.7899  |
| 1001.0739 | 1079.6692 | 1115.9714 |
| 1142.9616 | 1174.5578 | 1190.1062 |
| 1214.5002 | 1224.9054 | 1254.7430 |
| 1272.2384 | 1293.5517 | 1336.0496 |
| 1345.4543 | 1404.7817 | 1411.4796 |
| 1453.1801 | 1460.3593 | 1507.7010 |
| 1539.8138 | 1593.5322 | 1615.4772 |
| 1628.7007 | 1665.3454 | 2192.4888 |
| 3154.2868 | 3160.6886 | 3166.7797 |
| 3179.5137 | 3181.2796 | 3183.6332 |
| 3198.2713 | 3234.5958 | 3473.7867 |

ZeroEnergy[kcal/mol] 54.6

ElectronicLevels[1/cm] 1

0 2

End

End

Well i6 # i6

Species

RRHO

Geometry[angstrom] 25

|   |               |               |    |
|---|---------------|---------------|----|
| C | 2.5569446896  | 1.0911571693  | 0. |
| C | 1.1429894649  | 1.1856517458  | 0. |
| C | 0.3611716297  | -0.0093615624 | 0. |
| C | 1.0322395376  | -1.2695336515 | 0. |
| C | 2.4365296432  | -1.3123869643 | 0. |
| C | 3.1905778354  | -0.1392143457 | 0. |
| C | -1.0689881839 | 0.0666776211  | 0. |
| C | -1.8339131008 | -1.16872336   | 0. |
| C | -1.1183388622 | -2.3985547364 | 0. |
| C | 0.2485393364  | -2.4593096381 | 0. |
| C | 0.4871453754  | 2.438858401   | 0. |
| C | -0.8927420832 | 2.5047339004  | 0. |
| C | -1.6654941101 | 1.3417283845  | 0. |
| C | -5.1669648019 | 0.5174778396  | 0. |
| C | -4.2147904722 | -0.3251703094 | 0. |
| C | -3.256155328  | -1.2845108152 | 0. |
| H | 3.1397048837  | 2.0057721257  | 0. |
| H | 2.9318383654  | -2.2772219839 | 0. |
| H | 4.2728764779  | -0.192894924  | 0. |
| H | -1.6926533422 | -3.318388305  | 0. |
| H | 0.7525456082  | -3.4194948657 | 0. |
| H | 1.0832861573  | 3.345037123   | 0. |
| H | -1.3910484832 | 3.4670537828  | 0. |
| H | -2.7430248793 | 1.4220549612  | 0. |
| H | -3.6087223577 | -2.3172875927 | 0. |

```

Core RigidRotor
SymmetryFactor 1
End
Frequencies[1/cm] 69
44.3884 124.3933 132.6210
160.7698 203.1549 219.1808
273.2745 295.9100 358.7724
365.3807 437.1636 470.7392
474.0591 494.0489 497.0149
528.1671 538.5800 597.0550
611.1152 645.5741 678.5274
761.6995 769.4615 781.6948
802.7547 813.8198 833.2992
854.9408 901.1952 918.5105
952.8994 973.1135 981.7332
991.5508 1017.5201 1065.9376
1099.6816 1127.6993 1139.6976
1158.9746 1187.2161 1209.6704
1223.5168 1237.8795 1247.5241
1275.8766 1352.8311 1371.0921
1390.5371 1431.8235 1449.6218
1458.9638 1464.2420 1506.2502
1531.7556 1586.1813 1594.2287
1597.3926 1614.7446 2014.3085
3085.6651 3167.1023 3168.4489
3170.2597 3175.7426 3184.4207
3189.1784 3192.6713 3212.9163
ZeroEnergy[kcal/mol] 70.5
ElectronicLevels[1/cm] 1
0 2
End
End
Well i8 # i8
Species
RRHO
Geometry[angstrom] 25
C 2.5118921345 1.0880104851 0.0189825455
C 1.0919575206 1.1681612055 0.0217602356
C 0.3305156816 -0.041134198 0.020866794
C 1.0150171426 -1.2987955206 0.0185801646
C 2.3954791112 -1.3241531728 0.014885416
C 3.1461571223 -0.1285091535 0.0142239663
C -1.0878970261 0.0313584182 0.0173682862
C -1.927734947 -1.254732667 0.0122994721
C -1.1074714412 -2.5329127762 0.0352205793
C 0.2278917794 -2.5255456159 0.027720367
C 0.4120021333 2.4098394002 0.0276903488
C -0.9618508517 2.4541562872 0.0293593725
C -1.7110424357 1.2616919726 0.0216024265

```

```

C -4.6308124508 -2.0370974288 -2.8309830456
C -3.7388617388 -1.6958189109 -1.9179730049
C -2.9037258041 -1.2917459507 -1.0696225712
H 3.0853395008 2.008608162 0.0220142323
H 2.909621189 -2.2794117535 0.0137441254
H 4.2289180654 -0.1786739124 0.0116770526
H -2.5547325251 -1.2483539073 0.9230916263
H -1.6685346338 -3.4597102181 0.0409549697
H 0.7676679553 -3.4674269239 0.0376698381
H 0.9926146828 3.3259951779 0.0290824628
H -1.4779950844 3.4072172687 0.0322110619
H -2.7946960802 1.3142217323 0.0054742783
  Core RigidRotor
  SymmetryFactor 1
  End
  Frequencies[1/cm] 69
    26.6013 38.3555 106.1338
    156.6942 191.8795 194.7956
    259.9122 278.9345 339.2650
    365.0768 392.2029 438.7742
    467.2092 475.3020 477.4771
    502.5046 530.3980 570.6145
    597.1276 643.3531 660.5928
    734.5222 758.6583 788.7769
    793.8547 803.1977 821.0914
    851.9514 855.6597 914.3216
    929.5351 973.0521 984.1555
    992.6614 999.7884 1045.0965
    1074.1304 1102.6970 1120.4529
    1169.8110 1185.0848 1198.5890
    1207.0191 1234.8628 1245.0948
    1258.5233 1283.4206 1364.1148
    1373.8185 1393.3808 1416.6806
    1421.3103 1465.2450 1498.1721
    1542.6974 1621.8728 1634.3654
    1648.1514 1700.2059 1948.7760
    2923.7597 3157.3972 3162.0813
    3163.3283 3168.8330 3171.1296
    3187.8611 3188.6632 3189.2468
  ZeroEnergy[kcal/mol] 108.2
  ElectronicLevels[1/cm] 1
    0 2
  End
  End
  Bimolecular P2 # phenanthrynyl + C2H2
  Fragment C14H7
  RRHO
  Geometry[angstrom] 21
C 2.785159 0.874853 0.00
C 1.371008 0.832869 -0.00

```

|   |           |           |       |
|---|-----------|-----------|-------|
| C | 0.716966  | -0.439717 | -0.00 |
| C | 1.549555  | -1.555053 | -0.00 |
| C | 2.908581  | -1.549480 | 0.00  |
| C | 3.539938  | -0.279607 | 0.00  |
| C | -0.715012 | -0.496794 | -0.00 |
| C | -1.551854 | -1.614858 | -0.00 |
| C | 0.566963  | 2.018426  | -0.00 |
| C | -0.793178 | 1.962903  | -0.00 |
| C | -1.499204 | 0.713229  | -0.00 |
| C | -2.923938 | 0.666221  | 0.00  |
| C | -3.649574 | -0.523999 | 0.00  |
| C | -2.788615 | -1.621689 | 0.00  |
| H | 3.276426  | 1.841816  | 0.00  |
| H | 3.495280  | -2.461137 | 0.00  |
| H | 4.623221  | -0.224213 | 0.00  |
| H | 1.070738  | 2.979314  | -0.00 |
| H | -1.370303 | 2.881182  | -0.00 |
| H | -3.464895 | 1.607389  | 0.00  |
| H | -4.731227 | -0.548178 | 0.00  |

Core RigidRotor

SymmetryFactor 1

End

Frequencies[1/cm] 57

|           |           |           |
|-----------|-----------|-----------|
| 97.5233   | 130.9593  | 217.6501  |
| 235.2771  | 242.7574  | 380.8247  |
| 415.2875  | 446.6019  | 450.8809  |
| 462.1908  | 470.0646  | 512.4947  |
| 548.8311  | 584.1860  | 594.3175  |
| 661.0581  | 665.3065  | 726.0083  |
| 748.4073  | 761.3440  | 769.6862  |
| 806.5268  | 844.6845  | 875.2896  |
| 890.3231  | 940.9563  | 970.0704  |
| 981.1091  | 982.6918  | 1054.0355 |
| 1067.0967 | 1132.6549 | 1144.7551 |
| 1171.1460 | 1189.5766 | 1219.9747 |
| 1229.6604 | 1267.5846 | 1325.9037 |
| 1343.1816 | 1387.3664 | 1413.6586 |
| 1435.2096 | 1450.8579 | 1492.7488 |
| 1509.7869 | 1536.9604 | 1630.1257 |
| 1648.0069 | 2035.6063 | 3158.8859 |
| 3161.0099 | 3164.1619 | 3172.4776 |
| 3178.7450 | 3183.8469 | 3201.1039 |

ZeroEnergy[kcal/mol] 0.

ElectronicLevels[1/cm] 1

0 2

End

Fragment C2H2

RRHO

Geometry[angstrom] 4

|   |          |          |           |
|---|----------|----------|-----------|
| H | 0.000000 | 0.000000 | -1.660312 |
|---|----------|----------|-----------|

```

C      0.000000      0.000000      -0.598105
C      0.000000      0.000000      0.598105
H      0.000000      0.000000      1.660312
      Core      RigidRotor
      SymmetryFactor      2
      End
      Frequencies[1/cm]      7
664. 664. 766. 766. 2066. 3406. 3509.
      ZeroEnergy[kcal/mol]      0.
      ElectronicLevels[1/cm]      1
      0 1
      End
      GroundEnergy[kcal/mol]      137.2
      End
      Bimolecular      P4      # phenalenyl + C3
      Fragment      C13H9
      RRHO
      Geometry[angstrom]      22
C 1.8178437237 1.1500188787 0.
C 0.4040855703 1.2412879264 0.
C -0.3640161484 0.0360546041 0.
C 0.295563854 -1.2318435257 0.
C 1.7118740006 -1.2646995826 0.
C 2.4508937258 -0.0874345432 0.
C -1.7918260148 0.098727446 0.
C -2.528374262 -1.1115156275 0.
C -1.8784521875 -2.3401953576 0.
C -0.4902923267 -2.4106033848 0.
C -0.2755210298 2.4843133519 0.
C -1.6645240354 2.5358058695 0.
C -2.419580164 1.3688101005 0.
H 2.4033242798 2.0629913578 0.
H 2.2152127511 -2.2253606116 0.
H 3.5342507668 -0.134934309 0.
H -3.6120000495 -1.0670710706 0.
H -2.4613062677 -3.2546236916 0.
H 0.0077871102 -3.3739995395 0.
H 0.3049218644 3.4004248442 0.
H -2.1651020143 3.4977366206 0.
H -3.5029601465 1.4194902442 0.
      Core      RigidRotor
      SymmetryFactor      6
      End
      Frequencies[1/cm]      60
161.5667      161.6962      210.0358
285.7289      429.6145      430.2224
480.4549      480.5152      486.3764
490.4889      491.2758      585.1701
624.0981      644.5109      644.9080
752.5599      753.7435      768.8897

```

|           |           |           |
|-----------|-----------|-----------|
| 788.3498  | 834.1765  | 834.2711  |
| 852.9716  | 853.4431  | 888.7918  |
| 890.2833  | 971.3642  | 971.9654  |
| 980.5023  | 1056.0280 | 1056.3452 |
| 1112.5786 | 1123.2460 | 1123.4518 |
| 1167.4182 | 1203.0883 | 1203.2645 |
| 1218.5071 | 1252.3280 | 1252.4588 |
| 1347.1764 | 1347.2744 | 1408.3229 |
| 1424.0597 | 1446.7136 | 1446.8425 |
| 1498.1788 | 1548.8329 | 1577.4406 |
| 1577.5901 | 1590.2508 | 1590.3250 |
| 3159.9117 | 3159.9725 | 3162.0532 |
| 3168.7826 | 3171.6580 | 3171.9310 |
| 3184.0389 | 3184.1436 | 3186.3543 |

ZeroEnergy[kcal/mol] 0.

ElectronicLevels[1/cm] 1

0 2

End

Fragment C3

RRHO

Geometry[angstrom] 3

C 1.291048 -0. 0.000000

C 0.000000 0. 0.000000

C -1.291048 -0. 0.000000

Core RigidRotor

SymmetryFactor 2

End

Frequencies[1/cm] 4

106.2317 106.2317 1237.5978 2148.2082

ZeroEnergy[kcal/mol] 0.

ElectronicLevels[1/cm] 1

0 1

End

GroundEnergy[kcal/mol] 137.8

End

Barrier ts1 pyr1 i1 # ts1

RRHO

Geometry[angstrom] 25 #

C 2.889741 -1.165753 0.00

C 1.478119 -1.188715 0.00

C 0.748789 0.045699 0.00

C 1.525993 1.211156 -0.00

C 2.892095 1.249098 -0.00

C 3.590605 0.023287 -0.00

C -0.702947 0.010476 0.00

C -1.510447 1.192409 0.00

C 0.759981 -2.428978 0.00

C -0.595872 -2.457237 -0.00

C -1.367645 -1.247958 -0.00

C -2.777815 -1.297689 -0.00

|   |           |           |       |
|---|-----------|-----------|-------|
| C | -3.533614 | -0.143039 | -0.00 |
| C | -2.899175 | 1.103162  | 0.00  |
| H | 3.422577  | -2.110625 | 0.00  |
| H | 3.436806  | 2.188017  | -0.00 |
| H | 4.675655  | 0.019342  | -0.00 |
| H | 1.329420  | -3.352717 | 0.00  |
| H | -1.126847 | -3.403214 | -0.00 |
| H | -3.262854 | -2.268042 | -0.00 |
| H | -4.615973 | -0.197287 | -0.00 |
| H | -3.481820 | 2.016247  | 0.00  |
| C | -0.839183 | 2.445248  | 0.00  |
| C | 0.141035  | 3.169442  | -0.00 |
| H | 0.825078  | 3.984629  | -0.00 |

Core RigidRotor

SymmetryFactor 1

End

Tunneling Eckart

ImaginaryFrequency[1/cm] 346.5878

WellDepth[kcal/mol] 55.0

WellDepth[kcal/mol] 4.6

End

Frequencies[1/cm] 68

|           |           |           |
|-----------|-----------|-----------|
| 78.5810   | 113.8852  |           |
| 157.3723  | 226.4136  | 241.5056  |
| 262.1357  | 373.4840  | 388.1286  |
| 426.5528  | 435.7769  | 485.3459  |
| 491.4354  | 504.2754  | 529.1462  |
| 553.3771  | 562.5446  | 573.3974  |
| 610.5481  | 636.8783  | 655.0103  |
| 717.7867  | 718.2544  | 744.1022  |
| 757.0497  | 778.9266  | 800.3637  |
| 817.4256  | 843.7118  | 852.7529  |
| 889.9778  | 922.9726  | 970.0332  |
| 979.6023  | 988.6441  | 996.1459  |
| 1011.6756 | 1071.9145 | 1100.6417 |
| 1142.7452 | 1172.2959 | 1191.9110 |
| 1196.2848 | 1228.2905 | 1251.9256 |
| 1266.0870 | 1304.8987 | 1338.5873 |
| 1359.1957 | 1407.5231 | 1423.3232 |
| 1448.2239 | 1459.6003 | 1512.4236 |
| 1525.3674 | 1584.0900 | 1624.6009 |
| 1640.4236 | 1654.0484 | 2088.3193 |
| 3149.0504 | 3156.2459 | 3161.6837 |
| 3164.5592 | 3175.4262 | 3178.4044 |
| 3181.0309 | 3195.3314 | 3448.8030 |

ZeroEnergy[kcal/mol] 55.2

ElectronicLevels[1/cm] 1

0 2

End

Barrier ts2 pyr3 i2 # ts2

```

RRHO
  Geometry[angstrom]  25      #
C      2.878030      1.184896    -0.00
C      1.460792      1.241648     0.00
C      0.718607      0.021177     0.00
C      1.420642     -1.222982    -0.00
C      2.810770     -1.225765    -0.00
C      3.537355     -0.024176    -0.00
C     -0.718366      0.053375     0.00
C     -1.463436     -1.212885     0.00
C     -0.697521     -2.440072    -0.00
C      0.653004     -2.447457    -0.00
C      0.767000      2.480174     0.00
C     -0.612315      2.513059     0.00
C     -1.304694      1.305469     0.00
C     -3.721024      1.136367    -0.00
C     -3.576871     -0.078468     0.00
C     -2.838867     -1.267383     0.00
H      3.437088      2.114480     0.00
H      3.337675     -2.174275    -0.00
H      4.620976     -0.052737    -0.00
H     -1.248414     -3.374646    -0.00
H      1.193628     -3.388302    -0.00
H      1.339307      3.402897     0.00
H     -1.140426      3.461216     0.00
H     -4.078353      2.138309    -0.00
H     -3.340120     -2.228801     0.00
  Core      RigidRotor
  SymmetryFactor      1
  End
  Tunneling      Eckart
  ImaginaryFrequency[1/cm]  326.8111
  WellDepth[kcal/mol]      67.1
  WellDepth[kcal/mol]      3.8
  End
  Frequencies[1/cm]      68
  70.0118      131.4262
  188.6729      203.4686      231.9579
  264.0973      348.7896      386.9108
  436.5821      454.3957      462.4112
  477.9408      494.6130      505.6620
  529.8547      545.4330      560.8047
  595.2112      612.8544      646.8174
  684.3019      719.7686      758.0925
  762.9913      777.9237      787.5593
  790.5819      826.0168      837.5606
  852.5085      911.8772      958.4921
  979.5056      980.1584      989.4057
  1045.4655     1080.0058     1106.0047
  1138.5694     1153.0514     1180.6970

```



|           |           |           |
|-----------|-----------|-----------|
| 1201.8599 | 1232.3998 | 1241.4709 |
| 1261.1047 | 1329.6098 | 1350.8346 |
| 1382.8547 | 1408.6530 | 1430.7872 |
| 1443.7973 | 1477.5357 | 1507.7708 |
| 1530.6909 | 1587.2605 | 1607.7782 |
| 1623.3459 | 1659.2512 | 2056.4807 |
| 3148.9181 | 3156.6770 | 3160.7505 |
| 3165.2422 | 3166.1301 | 3168.7269 |
| 3176.4630 | 3186.6178 | 3451.8873 |

ZeroEnergy[kcal/mol] 67.1

ElectronicLevels[1/cm] 1

0 2

End

Barrier ts3 pyr2 i3 # ts3

RRHO

Geometry[angstrom] 25 #

|   |           |           |           |
|---|-----------|-----------|-----------|
| C | 2.513096  | -1.655210 | 0.038140  |
| C | 1.122182  | -1.415505 | 0.044236  |
| C | 0.640143  | -0.076542 | -0.042773 |
| C | 1.577108  | 0.989860  | -0.136258 |
| C | 2.933245  | 0.708791  | -0.150983 |
| C | 3.404857  | -0.610787 | -0.059425 |
| C | -0.782818 | 0.131303  | -0.048546 |
| C | -1.515665 | 1.308507  | -0.133385 |
| C | 0.190061  | -2.500620 | 0.130118  |
| C | -1.153644 | -2.296556 | 0.119499  |
| C | -1.706446 | -0.977667 | 0.024741  |
| C | -3.115776 | -0.766309 | 0.002894  |
| C | -3.697688 | 0.495189  | -0.088999 |
| C | -2.737705 | 1.515425  | -0.150207 |
| H | 2.868116  | -2.677760 | 0.108318  |
| H | 3.639648  | 1.527867  | -0.224322 |
| H | 4.472172  | -0.800295 | -0.064816 |
| H | 0.586870  | -3.507793 | 0.200489  |
| H | -1.832808 | -3.139814 | 0.181769  |
| H | -3.758294 | -1.639447 | 0.063438  |
| H | -4.771863 | 0.633004  | -0.102642 |
| C | 0.726908  | 3.164070  | 0.738932  |
| C | 1.138931  | 2.415216  | -0.252937 |
| H | 0.373821  | 4.174093  | 0.884034  |
| H | 1.201597  | 2.855159  | -1.256535 |

Core RigidRotor

SymmetryFactor 0.5

End

Tunneling Eckart

ImaginaryFrequency[1/cm] 138.4933

WellDepth[kcal/mol] 99.4

WellDepth[kcal/mol] 1.9

End

Frequencies[1/cm] 68

|           |           |           |
|-----------|-----------|-----------|
| 63.2252   | 112.9780  |           |
| 153.7867  | 159.0190  | 234.4296  |
| 240.2077  | 295.2679  | 357.3470  |
| 396.1520  | 427.7678  | 453.8260  |
| 463.8637  | 471.3902  | 503.8551  |
| 527.3153  | 540.7268  | 578.2631  |
| 618.6717  | 622.9349  | 680.0957  |
| 683.3468  | 694.6341  | 774.1426  |
| 774.7040  | 780.4494  | 796.5641  |
| 825.3196  | 834.4200  | 852.6322  |
| 879.5597  | 926.5129  | 947.2647  |
| 965.6238  | 976.4314  | 988.3459  |
| 1027.6951 | 1091.9483 | 1115.8070 |
| 1135.8787 | 1167.4576 | 1190.5499 |
| 1214.3862 | 1232.2045 | 1239.8363 |
| 1262.6842 | 1275.7677 | 1326.8198 |
| 1349.6411 | 1400.4661 | 1426.3826 |
| 1438.6636 | 1458.3868 | 1496.6625 |
| 1537.8569 | 1578.2984 | 1633.1005 |
| 1645.6008 | 1662.2874 | 2013.1998 |
| 3003.7248 | 3157.6761 | 3161.6515 |
| 3164.1273 | 3174.3038 | 3179.7667 |
| 3187.1634 | 3188.7654 | 3242.6261 |

ZeroEnergy[kcal/mol] 100.0

ElectronicLevels[1/cm] 1

0 2

End

Barrier ts4 pyr2 i4 # ts4

RRHO

Geometry[angstrom] 25 #

|   |           |           |      |
|---|-----------|-----------|------|
| C | 2.852131  | 1.105272  | 0.0  |
| C | 1.466342  | 1.185964  | 0.0  |
| C | 0.686501  | -0.015271 | -0.0 |
| C | 1.361936  | -1.275753 | -0.0 |
| C | 2.778457  | -1.305280 | 0.0  |
| C | 3.506727  | -0.137414 | 0.0  |
| C | -0.740822 | 0.037212  | -0.0 |
| C | -1.454530 | -1.178385 | -0.0 |
| C | -0.771934 | -2.420995 | -0.0 |
| C | 0.595211  | -2.469533 | -0.0 |
| C | 0.780679  | 2.459725  | 0.0  |
| C | -0.562576 | 2.538767  | -0.0 |
| C | -1.420081 | 1.351453  | -0.0 |
| C | -2.754745 | 1.522542  | -0.0 |
| H | 3.433928  | 2.020840  | 0.0  |
| H | 3.279815  | -2.267030 | 0.0  |
| H | 4.590348  | -0.172251 | 0.0  |
| H | -1.358977 | -3.331417 | -0.0 |
| H | 1.109907  | -3.424053 | -0.0 |
| H | 1.382329  | 3.362852  | 0.0  |

|   |           |           |      |
|---|-----------|-----------|------|
| H | -1.054721 | 3.504601  | -0.0 |
| H | -3.329177 | 2.441665  | -0.0 |
| C | -3.965980 | -0.588369 | 0.0  |
| C | -2.866904 | -1.111887 | -0.0 |
| H | -4.995912 | -0.323492 | 0.0  |

Core RigidRotor

SymmetryFactor 1

End

Tunneling Eckart

ImaginaryFrequency[1/cm] 320.1717

WellDepth[kcal/mol] 68.7

WellDepth[kcal/mol] 3.6

End

Frequencies[1/cm] 68

|           |           |           |
|-----------|-----------|-----------|
| 84.1857   | 108.5569  |           |
| 181.8077  | 208.9317  | 229.8046  |
| 340.2698  | 353.0975  | 383.3735  |
| 424.0774  | 428.2775  | 431.5073  |
| 476.4204  | 494.1944  | 529.5233  |
| 530.5133  | 550.3078  | 570.9358  |
| 596.9490  | 598.8909  | 639.7168  |
| 684.9110  | 706.3727  | 710.1730  |
| 725.6639  | 754.0248  | 767.2910  |
| 810.2145  | 818.2157  | 822.7197  |
| 853.5425  | 902.4983  | 907.8478  |
| 945.9905  | 972.7342  | 973.5517  |
| 980.1171  | 988.8174  | 1095.8447 |
| 1123.0403 | 1153.2803 | 1182.6573 |
| 1201.1101 | 1233.6588 | 1258.6152 |
| 1262.0424 | 1280.7582 | 1367.6996 |
| 1370.9121 | 1390.3936 | 1428.3235 |
| 1455.5777 | 1468.1616 | 1525.4821 |
| 1535.7671 | 1592.2201 | 1625.2402 |
| 1632.7810 | 1666.9083 | 2100.7464 |
| 3157.5261 | 3161.3010 | 3167.9216 |
| 3170.7075 | 3180.7174 | 3185.1156 |
| 3186.0909 | 3191.4483 | 3458.5837 |

ZeroEnergy[kcal/mol] 69.3

ElectronicLevels[1/cm] 1

0 2

End

Barrier ts6 i3 P2 # ts6

RRHO

Geometry[angstrom] 25 #

|   |          |           |           |
|---|----------|-----------|-----------|
| C | 2.170438 | -2.103922 | 0.020685  |
| C | 0.826904 | -1.663199 | 0.025517  |
| C | 0.554369 | -0.260090 | -0.048248 |
| C | 1.659189 | 0.594109  | -0.130277 |
| C | 2.959528 | 0.180736  | -0.127854 |

|   |           |           |           |
|---|-----------|-----------|-----------|
| C | 3.216070  | -1.208242 | -0.053750 |
| C | -0.811975 | 0.181016  | -0.037091 |
| C | -1.326213 | 1.477013  | -0.093503 |
| C | -0.269103 | -2.582503 | 0.102352  |
| C | -1.562232 | -2.159929 | 0.106975  |
| C | -1.898335 | -0.766802 | 0.037975  |
| C | -3.256702 | -0.334203 | 0.043764  |
| C | -3.634084 | 1.005763  | -0.021572 |
| C | -2.510921 | 1.832976  | -0.085674 |
| C | 1.961074  | 3.482043  | 0.576165  |
| C | 1.474743  | 2.915985  | -0.382110 |
| H | 2.368359  | -3.168877 | 0.078093  |
| H | 3.777266  | 0.890519  | -0.183577 |
| H | 4.240808  | -1.564617 | -0.055373 |
| H | -0.044324 | -3.642663 | 0.156596  |
| H | -2.368111 | -2.883471 | 0.164483  |
| H | -4.030880 | -1.092952 | 0.103546  |
| H | -4.669385 | 1.320590  | -0.016725 |
| H | 2.402116  | 3.824565  | 1.481206  |
| H | 1.007639  | 2.772395  | -1.328383 |

Core RigidRotor  
SymmetryFactor 0.5

End

Tunneling Eckart  
ImaginaryFrequency[1/cm] 312.4934  
WellDepth[kcal/mol] 41.3  
WellDepth[kcal/mol] 2.2

End

| Frequencies[1/cm] |           |           | 68 |
|-------------------|-----------|-----------|----|
| 31.9814           | 41.2221   |           |    |
| 101.1023          | 118.0465  | 132.3821  |    |
| 201.7788          | 234.4560  | 236.5591  |    |
| 253.5205          | 383.0452  | 416.5115  |    |
| 443.4784          | 452.5266  | 461.7332  |    |
| 472.2720          | 516.7275  | 540.8275  |    |
| 554.1821          | 586.3416  | 594.6350  |    |
| 641.6106          | 658.1027  | 671.4914  |    |
| 703.8964          | 759.0591  | 761.2835  |    |
| 763.4966          | 770.5510  | 778.6303  |    |
| 811.3941          | 847.6057  | 876.2099  |    |
| 901.1739          | 942.0926  | 972.2346  |    |
| 981.3188          | 982.4890  | 1062.1250 |    |
| 1064.0514         | 1132.0515 | 1144.4772 |    |
| 1171.0267         | 1193.5141 | 1220.7383 |    |
| 1229.3459         | 1268.2552 | 1324.5621 |    |
| 1346.4653         | 1387.3516 | 1410.1000 |    |
| 1435.6500         | 1449.2451 | 1490.0082 |    |
| 1517.3065         | 1536.5871 | 1632.1294 |    |
| 1642.5062         | 1941.3488 | 2035.4632 |    |
| 3157.2645         | 3158.6743 | 3162.6503 |    |

3171.1519                    3178.2923                    3181.4578  
3197.6281                    3398.5225                    3485.1802

ZeroEnergy[kcal/mol]                    139.4

ElectronicLevels[1/cm]                    1

0 2

End

Barrier                    ts7    i1    i5    #   ts7

RRHO

Geometry[angstrom]                    25                    #

|   |           |           |           |
|---|-----------|-----------|-----------|
| C | 3.123018  | -0.739097 | 0.063229  |
| C | 1.712754  | -0.963453 | -0.033936 |
| C | 0.794631  | 0.128726  | -0.059043 |
| C | 1.447855  | 1.385278  | -0.172546 |
| C | 2.761053  | 1.575628  | -0.095365 |
| C | 3.679766  | 0.517616  | 0.129216  |
| C | -0.626165 | -0.104083 | -0.017665 |
| C | -1.605645 | 0.940583  | 0.003873  |
| C | 1.199833  | -2.298147 | -0.045934 |
| C | -0.138946 | -2.528824 | -0.032334 |
| C | -1.085776 | -1.455961 | -0.005128 |
| C | -2.469084 | -1.735784 | 0.027726  |
| C | -3.393685 | -0.716015 | 0.048759  |
| C | -2.960834 | 0.614766  | 0.037037  |
| C | -1.280546 | 2.331114  | -0.001741 |
| C | -1.141391 | 3.528032  | 0.001103  |
| H | 3.763448  | -1.615235 | 0.115547  |
| H | 1.918002  | 2.444918  | 0.432464  |
| H | 4.739070  | 0.668014  | 0.297599  |
| H | 1.900801  | -3.126188 | -0.052205 |
| H | -0.519769 | -3.544543 | -0.034222 |
| H | -2.791078 | -2.771482 | 0.036515  |
| H | -4.454761 | -0.935060 | 0.074308  |
| H | -3.684007 | 1.420542  | 0.054132  |
| H | -0.972733 | 4.576757  | -0.007654 |

Core                    RigidRotor

SymmetryFactor                    0.5

End

Tunneling                    Eckart

ImaginaryFrequency[1/cm]                    2044.3978

WellDepth[kcal/mol]                    62.0

WellDepth[kcal/mol]                    58.0

End

Frequencies[1/cm]                    68

|          |          |          |
|----------|----------|----------|
| 53.6453  | 101.4376 |          |
| 141.3265 | 154.0910 | 220.3646 |
| 226.4185 | 241.7998 | 369.3969 |
| 375.8217 | 394.7494 | 416.3117 |
| 427.3296 | 486.4604 | 507.2686 |
| 515.7480 | 531.7418 | 545.4810 |
| 569.7419 | 581.4682 | 627.8841 |

|           |           |           |
|-----------|-----------|-----------|
| 644.2826  | 666.8375  | 677.4072  |
| 708.3487  | 714.8106  | 775.5439  |
| 786.6085  | 795.5272  | 817.3156  |
| 833.0974  | 857.1283  | 929.3571  |
| 965.9424  | 971.5676  | 981.1523  |
| 990.7581  | 1001.1257 | 1082.8780 |
| 1103.8710 | 1144.3796 | 1173.4917 |
| 1191.9938 | 1215.6554 | 1218.3641 |
| 1258.5526 | 1269.7942 | 1348.8700 |
| 1355.0269 | 1396.0825 | 1411.7026 |
| 1437.4052 | 1462.3769 | 1495.2236 |
| 1534.7874 | 1587.1276 | 1627.9599 |
| 1647.5897 | 1705.3007 | 2163.2572 |
| 2195.4058 | 3147.1447 | 3159.6064 |
| 3166.0392 | 3178.1054 | 3182.9485 |
| 3187.7481 | 3198.3493 | 3476.0620 |

ZeroEnergy[kcal/mol] 112.6

ElectronicLevels[1/cm] 1

0 2

End

Barrier ts8 i3 i5 # ts8

RRHO

Geometry[angstrom] 25 #

|   |           |           |      |
|---|-----------|-----------|------|
| C | -3.216523 | -0.453141 | 0.0  |
| C | -1.846661 | -0.835313 | 0.0  |
| C | -0.822603 | 0.165487  | 0.0  |
| C | -1.340255 | 1.462090  | -0.0 |
| C | -2.565185 | 1.786892  | -0.0 |
| C | -3.628145 | 0.876397  | 0.0  |
| C | 0.570425  | -0.178457 | 0.0  |
| C | 1.587875  | 0.817638  | -0.0 |
| C | -1.431044 | -2.208160 | 0.0  |
| C | -0.112899 | -2.545728 | 0.0  |
| C | 0.925773  | -1.555116 | 0.0  |
| C | 2.290840  | -1.909839 | 0.0  |
| C | 3.268927  | -0.934690 | 0.0  |
| C | 2.920610  | 0.421897  | -0.0 |
| C | 1.215743  | 2.236993  | -0.0 |
| C | 1.892394  | 3.335230  | -0.0 |
| H | -3.967904 | -1.236932 | 0.0  |
| H | 0.046139  | 2.357057  | -0.0 |
| H | -4.676847 | 1.147031  | 0.0  |
| H | -2.191192 | -2.981945 | 0.0  |
| H | 0.179764  | -3.590326 | 0.0  |
| H | 2.562775  | -2.959918 | 0.0  |
| H | 4.315890  | -1.216082 | 0.0  |
| H | 3.691998  | 1.183122  | -0.0 |
| H | 1.783735  | 4.404914  | -0.0 |

Core RigidRotor

SymmetryFactor 1

```

End
Tunneling      Eckart
  ImaginaryFrequency[1/cm]    710.5553
  WellDepth[kcal/mol]         3.7
  WellDepth[kcal/mol]         47.2
End
Frequencies[1/cm]      68
  70.9695      111.9981
  163.8014      237.0523      255.2889
  271.2572      301.2110      314.7421
  383.0827      421.4499      444.2043
  475.8488      497.9059      512.1660
  527.9670      554.7680      569.6187
  571.1332      580.9238      655.8645
  683.8873      699.2120      756.8300
  772.7245      776.2535      776.5046
  798.6507      819.7388      848.4667
  863.3160      928.4218      950.2943
  966.1387      976.6080      978.7743
  989.8099      1015.1550      1093.1845
  1137.1578      1162.3011      1176.3430
  1192.8446      1224.1341      1238.4976
  1264.6134      1284.7663      1342.2733
  1348.7084      1401.5533      1418.1553
  1436.7768      1461.7097      1486.1891
  1535.5819      1541.9127      1579.5277
  1635.3497      1645.6353      1755.1825
  1999.8110      3157.9296      3160.8540
  3163.6591      3176.8087      3178.9871
  3186.3254      3189.5510      3299.8048
  ZeroEnergy[kcal/mol]        101.8
  ElectronicLevels[1/cm]      1
    0    2
End
Barrier      ts9    i2    i6    #    ts9
RRHO
Geometry[angstrom]      25    #
C      2.904672    1.080695    0.018660
C      1.492288    1.194990    0.004886
C      0.689407    0.011220    -0.007359
C      1.345871    -1.259974    -0.006377
C      2.735835    -1.319678    0.005289
C      3.513642    -0.153932    0.018439
C      -0.753015    0.099766    -0.018000
C      -1.530160    -1.153624    0.002927
C      -0.802450    -2.402413    -0.014656
C      0.544660    -2.458875    -0.018324
C      0.866507    2.467509    0.005897
C      -0.503511    2.568991    -0.016934
C      -1.261517    1.395324    -0.047996

```

|   |           |           |           |
|---|-----------|-----------|-----------|
| C | -3.645225 | 1.252739  | 0.033548  |
| C | -3.600061 | 0.002147  | 0.030274  |
| C | -2.910896 | -1.204610 | 0.026099  |
| H | 3.499017  | 1.987649  | 0.028439  |
| H | 3.219034  | -2.290851 | 0.003438  |
| H | 4.594954  | -0.228523 | 0.027735  |
| H | -1.387065 | -3.315878 | -0.015954 |
| H | 1.054227  | -3.416324 | -0.024064 |
| H | 1.481892  | 3.360912  | 0.019079  |
| H | -0.992734 | 3.536337  | -0.023270 |
| H | -2.572938 | 1.810852  | -0.123007 |
| H | -3.412672 | -2.165820 | 0.009361  |

Core RigidRotor  
SymmetryFactor 0.5

End

Tunneling Eckart  
ImaginaryFrequency[1/cm] 1131.0779  
WellDepth[kcal/mol] 32.8  
WellDepth[kcal/mol] 25.6

End

| Frequencies[1/cm] |           | 68        |
|-------------------|-----------|-----------|
| 64.6972           | 117.0689  |           |
| 175.1517          | 205.3783  | 222.9669  |
| 271.7722          | 293.5258  | 337.7460  |
| 392.0570          | 408.4802  | 445.3232  |
| 457.4496          | 473.5761  | 494.0867  |
| 502.8367          | 534.0813  | 545.6443  |
| 551.4650          | 607.1810  | 616.8764  |
| 653.5707          | 680.8413  | 759.3974  |
| 760.4500          | 777.5745  | 780.3355  |
| 783.0963          | 824.1952  | 838.3498  |
| 854.4478          | 911.3274  | 962.4137  |
| 975.2409          | 981.1901  | 990.4154  |
| 1046.0109         | 1083.6591 | 1111.7774 |
| 1135.4432         | 1160.5989 | 1182.9343 |
| 1201.6447         | 1228.4168 | 1236.4802 |
| 1263.1989         | 1322.1620 | 1342.6276 |
| 1377.2867         | 1402.3346 | 1430.9953 |
| 1436.6195         | 1472.1194 | 1508.4491 |
| 1516.1576         | 1581.4640 | 1604.7382 |
| 1625.2120         | 1662.8843 | 1819.9322 |
| 2064.1643         | 3160.9146 | 3163.2043 |
| 3164.6894         | 3166.1883 | 3171.8340 |
| 3180.8776         | 3182.6279 | 3188.9055 |

ZeroEnergy[kcal/mol] 96.1

ElectronicLevels[1/cm] 1

0 2

End

Barrier ts11 i6 i8 # ts11

RRHO



```

Geometry[angstrom]      25      #
C      3.082130      0.949699      0.011999
C      1.677004      1.158763      0.012803
C      0.807542      0.027874      0.015115
C      1.371091     -1.283949     -0.013556
C      2.748666     -1.438588     -0.018977
C      3.604908     -0.321568      0.000687
C      -0.605305      0.229529      0.015750
C      -1.498757     -0.964117      0.052577
C      -0.862412     -2.286081     -0.026536
C      0.475363     -2.421700     -0.055959
C      1.113996      2.458058      0.000377
C      -0.250671      2.631650     -0.018848
C      -1.111785      1.520609     -0.010353
C      -4.991472      0.675871     -0.079978
C      -3.929979     -0.050228     -0.027337
C      -2.903855     -0.866911     -0.001039
H      3.737544      1.813775      0.014003
H      3.169597     -2.438019     -0.043260
H      4.678365     -0.469701     -0.002076
H      -1.519591     -3.146069     -0.066801
H      0.912784     -3.411879     -0.127982
H      1.777237      3.316372      0.000453
H      -0.674485      3.628569     -0.037674
H      -2.182871      1.678225     -0.017945
H      -2.257353     -1.084729      1.140930
Core      RigidRotor
SymmetryFactor      0.5
End
Tunneling      Eckart
ImaginaryFrequency[1/cm]      1127.4394
WellDepth[kcal/mol]      57.6
WellDepth[kcal/mol]      19.9
End
Frequencies[1/cm]      68
46.8167      85.3315
141.2304      164.1529      201.1144
219.9164      288.3476      328.1294
345.0211      430.7518      442.2098
457.6076      477.6692      481.6941
500.6792      531.8707      548.8204
565.6565      602.4911      649.1125
696.8188      708.7794      764.3619
784.0987      799.0244      811.0553
825.5219      853.2008      919.3498
923.2744      952.4306      957.4057
989.7133      1001.6334      1010.1996
1059.2619      1073.1447      1114.5580
1125.2506      1142.4330      1181.8871
1205.9673      1232.0921      1243.4327

```

|           |           |           |
|-----------|-----------|-----------|
| 1262.7231 | 1301.2131 | 1374.5395 |
| 1393.0501 | 1417.2915 | 1428.2243 |
| 1465.7497 | 1494.3317 | 1514.9306 |
| 1540.4746 | 1615.9532 | 1625.1386 |
| 1636.4322 | 1678.0558 | 1921.9071 |
| 2000.4000 | 3166.0924 | 3168.6376 |
| 3169.8184 | 3173.7515 | 3188.6844 |
| 3191.7530 | 3195.2069 | 3201.4640 |

ZeroEnergy[kcal/mol] 128.1

ElectronicLevels[1/cm] 1

0 2

End

Barrier ts17 pyr1 pyr2 # ts17

RRHO

Geometry[angstrom] 25 #

|   |           |           |      |
|---|-----------|-----------|------|
| C | -2.815474 | 1.204629  | -0.0 |
| C | -1.413957 | 1.246064  | 0.0  |
| C | -0.713283 | 0.011512  | 0.0  |
| C | -1.379596 | -1.262733 | 0.0  |
| C | -2.781490 | -1.235153 | -0.0 |
| C | -3.475346 | -0.022944 | -0.0 |
| C | 0.694256  | 0.061426  | 0.0  |
| C | 1.353430  | -1.154286 | 0.0  |
| C | 0.733695  | -2.405093 | 0.0  |
| C | -0.616668 | -2.519586 | -0.0 |
| C | -0.624886 | 2.458739  | 0.0  |
| C | 0.743129  | 2.467039  | 0.0  |
| C | 1.485302  | 1.232944  | 0.0  |
| C | 2.891988  | 1.065385  | -0.0 |
| C | 3.534851  | -0.198041 | -0.0 |
| C | 2.711072  | -1.318055 | 0.0  |
| H | -3.385575 | 2.127526  | -0.0 |
| H | -3.334585 | -2.168351 | -0.0 |
| H | -4.559693 | -0.040271 | -0.0 |
| H | -1.160132 | -3.457142 | -0.0 |
| H | -1.159191 | 3.403481  | 0.0  |
| H | 1.275432  | 3.412577  | -0.0 |
| H | 3.521090  | 1.950555  | -0.0 |
| H | 4.616819  | -0.246363 | -0.0 |
| H | 2.223690  | -2.773098 | 0.0  |

Core RigidRotor

SymmetryFactor 1

End

Tunneling Eckart

ImaginaryFrequency[1/cm] 2599.2692

WellDepth[kcal/mol] 67.4

WellDepth[kcal/mol] 67.0

End

Frequencies[1/cm] 68

84.5580 144.9262

|           |           |           |
|-----------|-----------|-----------|
| 179.7749  | 233.7415  | 285.9298  |
| 360.5352  | 408.2610  | 416.5171  |
| 439.3409  | 470.3386  | 492.6142  |
| 495.8395  | 523.7072  | 524.2289  |
| 553.8998  | 568.6851  | 604.7384  |
| 655.7324  | 700.9241  | 716.9509  |
| 727.4322  | 763.7184  | 783.8121  |
| 801.3416  | 829.0609  | 832.7928  |
| 839.0616  | 870.1667  | 908.0093  |
| 914.2003  | 947.6928  | 976.7378  |
| 978.9783  | 987.0601  | 1010.5822 |
| 1082.3692 | 1106.9633 | 1120.1046 |
| 1158.3240 | 1188.1154 | 1200.0956 |
| 1221.6646 | 1241.8065 | 1254.6524 |
| 1284.7941 | 1316.7490 | 1374.5188 |
| 1392.5286 | 1416.5529 | 1441.0048 |
| 1455.1662 | 1466.2857 | 1502.8670 |
| 1531.8011 | 1568.0315 | 1576.7896 |
| 1606.1030 | 1637.2214 | 1673.4850 |
| 1731.4242 | 3154.8467 | 3156.7045 |
| 3159.8185 | 3169.1889 | 3174.8500 |
| 3180.7733 | 3183.7332 | 3190.6610 |

ZeroEnergy[kcal/mol] 67.6

ElectronicLevels[1/cm] 1

0 2

End

Barrier ts18 pyr2 pyr3 # ts18

RRHO

Geometry[angstrom] 25 #

|   |           |           |           |
|---|-----------|-----------|-----------|
| C | -2.739786 | -1.281677 | 0.020284  |
| C | -1.341433 | -1.259566 | 0.021637  |
| C | -0.664784 | -0.002866 | 0.019838  |
| C | -1.422954 | 1.206365  | -0.009392 |
| C | -2.826976 | 1.131477  | -0.011383 |
| C | -3.473334 | -0.095863 | 0.008279  |
| C | 0.761198  | 0.048595  | 0.025054  |
| C | 1.406617  | 1.323575  | 0.025645  |
| C | 0.629609  | 2.517249  | -0.034600 |
| C | -0.730980 | 2.459529  | -0.048521 |
| C | -0.555870 | -2.464082 | 0.006377  |
| C | 0.798778  | -2.425813 | -0.020539 |
| C | 1.522342  | -1.179914 | -0.016854 |
| C | 2.922609  | -1.154686 | -0.079468 |
| C | 3.501263  | 0.109346  | 0.088718  |
| C | 2.813959  | 1.252000  | 0.143627  |
| H | -3.253392 | -2.237206 | 0.022871  |
| H | -3.402811 | 2.050489  | -0.032607 |
| H | -4.556763 | -0.134599 | 0.007187  |
| H | 1.149085  | 3.468227  | -0.046546 |
| H | -1.318074 | 3.371313  | -0.081223 |

```

H          -1.076090  -3.416255   0.005193
H          1.372224  -3.346262  -0.043501
H          3.489513  -2.067690  -0.218197
H          3.994759   1.209966  -0.445389
  Core      RigidRotor
    SymmetryFactor    0.5
  End
  Tunneling      Eckart
    ImaginaryFrequency[1/cm]    2107.5613
    WellDepth[kcal/mol]        61.8
    WellDepth[kcal/mol]        62.4
  End
    Frequencies[1/cm]    68
    99.0822              147.2121
    209.1812             241.7853              264.1037
    349.9881             375.6121              394.5488
    412.9380             458.9583              491.7479
    506.5437             516.5646              521.0825
    536.6689             555.3142              576.4601
    595.7439             662.2867              687.2976
    717.1655             736.0816              768.9009
    769.9623             814.4767              826.1888
    829.5671             852.8482              876.2554
    914.3356             970.7003              980.5307
    985.8288             992.4045              993.2847
    1094.4712            1116.7944             1131.5464
    1156.6809            1178.8453             1202.0874
    1235.6561            1250.9511             1265.6253
    1296.6683            1330.5055             1353.7226
    1378.9895            1419.5272             1433.9439
    1442.5112            1455.1044             1500.7286
    1527.5223            1569.2980             1614.2585
    1633.1208            1660.6523             1693.6111
    2122.2327            3158.8861             3161.5478
    3164.5370            3169.8674             3177.0397
    3180.2074            3186.2933             3188.5368
    ZeroEnergy[kcal/mol]    62.4
    ElectronicLevels[1/cm]  1
      0  2
  End
  Barrier      vts   i8   P4   # barrierless C3 loss
  RRHO
    Stoichiometry C16H9
    Core      PhaseSpaceTheory
      FragmentGeometry[angstrom]    22
C 1.8178437237 1.1500188787 0.
C 0.4040855703 1.2412879264 0.
C -0.3640161484 0.0360546041 0.
C 0.295563854 -1.2318435257 0.
C 1.7118740006 -1.2646995826 0.

```

```

C  2.4508937258  -0.0874345432  0.
C  -1.7918260148  0.098727446  0.
C  -2.528374262  -1.1115156275  0.
C  -1.8784521875  -2.3401953576  0.
C  -0.4902923267  -2.4106033848  0.
C  -0.2755210298  2.4843133519  0.
C  -1.6645240354  2.5358058695  0.
C  -2.419580164  1.3688101005  0.
H  2.4033242798  2.0629913578  0.
H  2.2152127511  -2.2253606116  0.
H  3.5342507668  -0.134934309  0.
H  -3.6120000495  -1.0670710706  0.
H  -2.4613062677  -3.2546236916  0.
H  0.0077871102  -3.3739995395  0.
H  0.3049218644  3.4004248442  0.
H  -2.1651020143  3.4977366206  0.
H  -3.5029601465  1.4194902442  0.
      FragmentGeometry[angstrom]      3
C              1.291048  -0.  0.000000
C              0.000000  0.  0.000000
C             -1.291048  -0.  0.000000
      SymmetryFactor                    1
      PotentialPrefactor[au]            1.0E0
      PotentialPowerExponent            6.
End
      Frequencies[1/cm]                 64
161.5667      161.6962      210.0358
285.7289      429.6145      430.2224
480.4549      480.5152      486.3764
490.4889      491.2758      585.1701
624.0981      644.5109      644.9080
752.5599      753.7435      768.8897
788.3498      834.1765      834.2711
852.9716      853.4431      888.7918
890.2833      971.3642      971.9654
980.5023      1056.0280      1056.3452
1112.5786     1123.2460      1123.4518
1167.4182     1203.0883      1203.2645
1218.5071     1252.3280      1252.4588
1347.1764     1347.2744      1408.3229
1424.0597     1446.7136      1446.8425
1498.1788     1548.8329      1577.4406
1577.5901     1590.2508      1590.3250
3159.9117     3159.9725      3162.0532
3168.7826     3171.6580      3171.9310
3184.0389     3184.1436      3186.3543
106.2317  106.2317  1237.5978      2148.2082
      ElectronicLevels[1/cm]           1
              0              2
      ZeroEnergy[kcal/mol]             137.8

```

End  
End

**Table S2.** Reaction model, rate coefficients, and computed reaction event frequencies.

| Rxn ID | Reaction <sup>a</sup>                                                                                                 | Rate constant <sup>b</sup> |          |          | Source                               | Rxn frequency <sup>c</sup> |         |
|--------|-----------------------------------------------------------------------------------------------------------------------|----------------------------|----------|----------|--------------------------------------|----------------------------|---------|
|        |                                                                                                                       | 1400 K                     | 1600 K   | 1800 K   |                                      | C3H08                      | XSF1.88 |
| 111    | $Z + H \rightarrow Z\bullet + H_2$                                                                                    | 2.77E+11                   | 6.94E+11 | 1.45E+12 | [1]                                  | 689.30                     | 3159.19 |
| 112    | reverse of 111                                                                                                        | 6.54E+11                   | 1.12E+12 | 1.78E+12 |                                      | 440.49                     | 2601.04 |
| 113    | $Z\bullet + H \rightarrow Z$                                                                                          | 1.25E+14                   | 1.27E+14 | 1.29E+14 | [2]                                  | 168.52                     | 342.95  |
| 121    | $A + H \rightarrow A\bullet + H_2$                                                                                    | 1.97E+11                   | 4.90E+11 | 1.02E+12 | [1]                                  | 249.95                     | 1395.57 |
| 122    | reverse of 121                                                                                                        | 3.16E+11                   | 5.77E+11 | 9.58E+11 |                                      | 120.95                     | 942.92  |
| 123    | $A\bullet + H \rightarrow A$                                                                                          | 1.12E+14                   | 1.14E+14 | 1.17E+14 | [2]                                  | 55.23                      | 205.12  |
| 131    | $Z + OH \rightarrow Z^* + H_2O$                                                                                       | 1.32E+11                   | 2.19E+11 | 3.39E+11 | [1]                                  | 17.12                      | 36.00   |
| 141    | $A + OH \rightarrow A^* + H_2O$                                                                                       | 1.56E+11                   | 2.51E+11 | 3.80E+11 | [1]                                  | 10.96                      | 25.00   |
| 151    | ${}^2R5 + H \rightarrow {}^2R5\bullet + H_2$                                                                          | 6.31E+10                   | 1.82E+11 | 4.25E+11 | [3]                                  | 122.77                     | 580.74  |
| 152    | reverse of 151                                                                                                        | 4.88E+11                   | 8.19E+11 | 1.28E+12 |                                      | 68.58                      | 461.16  |
| 153    | ${}^2R5\bullet + H \rightarrow {}^2R5$                                                                                | 1.65E+14                   | 1.70E+14 | 1.74E+14 | [2]                                  | 48.30                      | 111.46  |
| 204    | closure forming R5 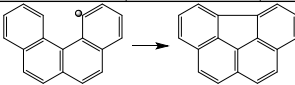 probability = 1  |                            |          |          |                                      | 1.69                       | 18.39   |
| 205    | closure forming R6  probability = 1 |                            |          |          |                                      | 1.72                       | 23.05   |
| 211    | $Z^* + C_2H_2 \rightarrow {}^2R5 + H$                                                                                 | 1.16E+12                   | 1.49E+12 | 1.71E+12 | [4]                                  | 49.96                      | 298.07  |
| 212    | reverse of 211                                                                                                        | 4.58E+09                   | 3.19E+10 | 1.34E+11 |                                      | 31.03                      | 167.65  |
| 221    | $6-6-6^* + C_2H_2 \rightarrow A + H$                                                                                  | 4.13E+11                   | 6.66E+11 | 9.52E+11 | [4]                                  | 9.22                       | 87.08   |
| 225    | $6-5-6^* + C_2H_2 \rightarrow A + H$                                                                                  | 9.48E+11                   | 9.80E+11 | 8.73E+11 | [5]                                  | 2.19                       | 15.14   |
| 231    | $Z^* + C_3H_4 \rightarrow A2A + H$                                                                                    | 8.19E+11                   | 9.22E+11 | 9.46E+11 | [6]                                  | 0.07                       | 0.26    |
| 233    | ${}^3R5^* + CH_3 \rightarrow A + H + H$                                                                               | 2.37E+12                   | 2.52E+12 | 2.63E+12 | [7]                                  | 0.01                       | 0.03    |
| 235    | ${}^2R5^* + CH_3 \rightarrow A2A + H + H$                                                                             | 3.04E+13                   | 2.47E+13 | 2.00E+13 | [8]                                  | 7.94                       | 18.30   |
| 237    | ${}^1R5 + CH_3 \rightarrow A + H + H$                                                                                 | 2.37E+11                   | 2.51E+11 | 2.63E+11 | = 0.1 <sup>d</sup> *k <sub>233</sub> | 17.42                      | 85.04   |
| 241    | ${}^1R5-A^* + C_2H_2 \rightarrow A + H$                                                                               | 3.89E+09                   | 1.13E+10 | 1.11E+10 | [9]                                  | 0.04                       | 0.24    |
| 251    | $5-6-6^* + C_2H_2 \rightarrow A + H$                                                                                  | 9.48E+11                   | 9.80E+11 | 8.73E+11 | =k <sub>225</sub>                    | 2.91                       | 19.90   |
| 253    | $6-6-5^* + C_2H_2 \rightarrow A + H$                                                                                  | 9.48E+11                   | 9.80E+11 | 8.73E+11 | =k <sub>225</sub>                    | 1.07                       | 8.27    |
| 255    | $5-5-5^* + C_2H_2 \rightarrow A + H$                                                                                  | 9.48E+11                   | 9.80E+11 | 8.73E+11 | =k <sub>225</sub>                    | 0.99                       | 4.91    |
| 257    | ${}^1R5-6-6^* + C_2H_2 \rightarrow A + H$                                                                             | 9.48E+11                   | 9.80E+11 | 8.73E+11 | =k <sub>225</sub>                    | 0.83                       | 5.48    |
| 259    | ${}^1R5-6-5^* + C_2H_2 \rightarrow A + H$                                                                             | 9.48E+11                   | 9.80E+11 | 8.73E+11 | =k <sub>225</sub>                    | 0.25                       | 1.36    |

|     |                                                                        |          |          |          |            |       |        |
|-----|------------------------------------------------------------------------|----------|----------|----------|------------|-------|--------|
| 311 | $Z^* + C_2H_2 \rightarrow ZC_2H + H$                                   | 7.30E+10 | 1.96E+11 | 4.09E+11 | [4]        | 10.01 | 89.48  |
| 312 | reverse of 311                                                         | 1.37E+11 | 5.04E+11 | 1.31E+12 |            | 2.66  | 22.73  |
| 314 | $R5C2H+H \rightarrow R5^*+C_2H_2$                                      | 1.37E+11 | 5.04E+11 | 1.31E+12 | $=k_{312}$ | 0.81  | 3.66   |
| 321 | $A^* + C_2H_2 \rightarrow AC2H + H$                                    | 1.38E+12 | 2.08E+12 | 2.52E+12 | [4]        | 25.26 | 114.71 |
| 322 | reverse of 321                                                         | 2.11E+12 | 4.38E+12 | 6.69E+12 |            | 30.43 | 144.57 |
| 351 | $^2R5-A^*+C_2H_2 \rightarrow R5AC2H+H$                                 | 2.68E+11 | 4.48E+11 | 6.28E+11 | [3]        | 12.38 | 52.26  |
| 352 | reverse of 351                                                         | 8.30E+11 | 1.78E+12 | 2.96E+12 |            | 3.85  | 19.56  |
| 411 | $AC2H^* + C_2H_2 \rightarrow A^*1$                                     | 3.75E+11 | 2.96E+11 | 2.07E+11 | [10]       | 0.17  | 0.94   |
| 412 | reverse of 411                                                         | 5.81E+01 | 3.05E+03 | 5.42E+04 |            | 0.10  | 1.17   |
| 421 | $AC2H^* + C_2H_2 \rightarrow A^*2$                                     | 1.68E+11 | 1.98E+11 | 1.46E+11 | [10]       | 0.11  | 0.63   |
| 422 | reverse of 421                                                         | 2.38E+01 | 1.91E+03 | 3.64E+04 |            | 0.06  | 0.80   |
| 431 | $AC2H^* + C_2H_2 \rightarrow AC2HC2H+H$                                | 3.96E+10 | 1.42E+11 | 3.26E+11 | [10]       | 0.19  | 1.70   |
| 432 | reverse of 431                                                         | 2.19E+11 | 1.00E+12 | 2.70E+12 |            | 0.11  | 1.34   |
| 501 | $A^*1 \rightarrow A^*2$                                                | 3.56E+04 | 3.78E+05 | 1.87E+06 | [10]       | 8.58  | 32.70  |
| 502 | $A^*2 \rightarrow A^*1$                                                | 3.25E+04 | 3.49E+05 | 1.78E+06 | [10]       | 4.59  | 28.10  |
| 511 | $ZZC2H + H \rightarrow R5 + H$                                         | 2.83E+12 | 4.13E+12 | 5.17E+12 | [4]        | 5.07  | 36.82  |
| 513 | $Z^*ZC2H \rightarrow R5^*$                                             | 1.00E+08 | 1.00E+08 | 1.00E+08 | guess      | 1.89  | 20.37  |
| 521 | $6-6-6C2H + H \rightarrow A + H$                                       | 4.13E+11 | 6.66E+11 | 9.52E+11 | [4]        | 0.22  | 1.92   |
| 531 | $AC2HC2H + H \rightarrow A^*1$                                         | 2.13E+12 | 1.94E+12 | 1.51E+12 | [10]       | 0.06  | 0.65   |
| 532 | reverse of 531                                                         | 5.98E+01 | 2.85E+03 | 4.76E+04 |            | 0.12  | 1.06   |
| 533 | $AC2HC2H + H \rightarrow A^*2$                                         | 8.66E+11 | 1.23E+12 | 1.03E+12 | [10]       | 0.05  | 0.23   |
| 534 | reverse of 533                                                         | 2.22E+01 | 1.69E+03 | 3.09E+04 |            | 0.06  | 0.45   |
| 536 | $A1^* \rightarrow$ cleavage                                            | 2.22E+01 | 1.69E+03 | 3.09E+04 | [10]       | 0.03  | 1.36   |
| 551 | $^2R5-AC2H + H \rightarrow A^*2$                                       | 1.64E+11 | 3.42E+11 | 3.96E+11 | [3]        | 1.09  | 3.53   |
| 552 | reverse of 551                                                         | 6.12E+03 | 1.71E+05 | 1.55E+06 |            | 0.38  | 1.51   |
| 561 | $5-6-6C2H + H \rightarrow A + H$                                       | 6.04E+12 | 3.53E+12 | 2.32E+12 | [11]       | 0.13  | 0.91   |
| 563 | $^1R5-6-6C2H+H \rightarrow A+H$                                        | 6.04E+12 | 3.53E+12 | 2.32E+12 | [11]       | 0.07  | 0.41   |
| 565 | $^1R5-R6C2H + H \rightarrow A+H$                                       | 6.08E+09 | 2.50E+10 | 3.60E+10 | [9]        | 0.01  | 0.01   |
| 567 | $R5C2H_{6-5} + H \rightarrow A+H$<br>$R5C2H_{6-6} + H \rightarrow A+H$ | 6.04E+12 | 3.53E+12 | 2.32E+12 | [11]       | 0.03  | 0.22   |
| 571 | $^3R5 + H \rightarrow A2A + H$                                         | 4.52E+11 | 1.10E+12 | 2.71E+12 | [6]        | 0.67  | 1.53   |
| 572 | reverse of 571                                                         | 1.30E+11 | 3.93E+11 | 1.15E+12 |            | 0.00  | 0.00   |
| 601 | $^2R5 + H \rightarrow ^2R5 + H$                                        | 4.18E+11 | 4.58E+11 | 4.20E+11 | [12]       | 13.26 | 58.16  |
| 603 | $^2R5-^2R5$ collision                                                  | 7.38E+11 | 1.08E+12 | 1.39E+12 | [13] [14]  | 2.20  | 17.15  |



|     |                                                                                   |                          |          |          |                           |        |        |
|-----|-----------------------------------------------------------------------------------|--------------------------|----------|----------|---------------------------|--------|--------|
| 605 | <sup>2</sup> R5-R6 collision                                                      | 7.38E+11                 | 1.08E+12 | 1.39E+12 | [13] [14]                 | 5.44   | 41.51  |
| 611 | embedded-R5 migration <sup>e</sup>                                                | $K_{eq}$                 | $K_{eq}$ | $K_{eq}$ | [15]                      | 71.15  | 306.75 |
|     | 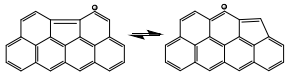 | 7.29                     | 4.78     | 3.44     |                           |        |        |
|     |  | 1                        | 1        | 1        |                           |        |        |
|     |  | 3.61                     | 2.82     | 2.33     |                           |        |        |
| 621 | <sup>2</sup> R5-R6 flip                                                           | Equilibrium constant = 1 |          |          | [14]                      | 11.25  | 97.67  |
| 711 | A1* + O <sub>2</sub> → A1O + O                                                    | 1.53E+13                 | 1.68E+13 | 1.80E+13 | [16] S46 in [17])         | 357.59 | 339.90 |
| 713 | A2* + O <sub>2</sub> → A2O + O                                                    | 1.34E+13                 | 1.54E+13 | 1.70E+13 | [16] (S48 in [17])        | 10.97  | 13.81  |
| 717 | A* + OH → R5 + CO                                                                 | 1.00E+14                 | 1.00E+14 | 1.00E+14 | [18]                      | 3.63   | 8.48   |
| 721 | A1*2O → R5 + CO                                                                   | 3.71E+05                 | 4.05E+06 | 2.72E+07 | [19] (S51 in [17])        | 59.41  | 64.29  |
| 723 | A1*1O → AR5 + CO                                                                  | 5.57E+04                 | 9.00E+05 | 8.34E+06 | [19] (S52 in [17])        | 46.17  | 37.43  |
| 725 | A2*1O → AR5 + CO                                                                  | 7.96E+04                 | 1.23E+06 | 1.05E+07 | [19] (S53 in [17])        | 5.56   | 8.54   |
|     | A2*2O → AR5 + CO                                                                  |                          |          |          |                           |        |        |
| 731 | AO + H <sub>2</sub> → AOH + H                                                     | 1.74E+11                 | 4.12E+11 | 8.05E+11 | [20,21]                   | 124.47 | 152.17 |
| 735 | AOH + H → A* + H <sub>2</sub> O                                                   | 2.97E+13                 | 3.77E+13 | 4.54E+13 | [22]                      | 115.94 | 144.73 |
| 745 | <sup>1</sup> R5 + O → Z* + CO                                                     | 1.10E+12                 | 1.21E+12 | 1.32E+12 | 0.1 <sup>d</sup> *k([17]) | 0.23   | 0.08   |
| 811 | <sup>2</sup> R5* + O <sub>2</sub> → <sup>2</sup> R5O+O                            | 1.86E+07                 | 7.52E+07 | 2.31E+08 | [23]                      | 0.00   | 0.00   |
| 813 | <sup>3</sup> R5* + O <sub>2</sub> → A* + CO + ...                                 | 5.20E+06                 | 1.83E+07 | 4.94E+07 | [23]                      | 0.00   | 0.00   |
| 815 | <sup>2</sup> R5* + OH → <sup>2</sup> R5O + H                                      | 6.40E+12                 | 8.91E+12 | 9.77E+12 | [24]                      | 0.79   | 1.50   |
| 821 | <sup>2</sup> R5O + H → CO + ...                                                   | 3.83E+13                 | 4.97E+13 | 5.87E+13 | [25]                      | 0.22   | 0.15   |

<sup>a</sup>Reaction site designation:

|      |                                                                                                                                                                                                                                                                                                                                                                                                                                                                                                                                                                                                                                                |
|------|------------------------------------------------------------------------------------------------------------------------------------------------------------------------------------------------------------------------------------------------------------------------------------------------------------------------------------------------------------------------------------------------------------------------------------------------------------------------------------------------------------------------------------------------------------------------------------------------------------------------------------------------|
| A    | armchair                                                                                                                                                                                                                                                                                                                                                                                                                                                                                                                                                                                                                                       |
| Z    | zigzag                                                                                                                                                                                                                                                                                                                                                                                                                                                                                                                                                                                                                                         |
| R5   | five-membered ring                                                                                                                                                                                                                                                                                                                                                                                                                                                                                                                                                                                                                             |
| R6   | six-membered ring                                                                                                                                                                                                                                                                                                                                                                                                                                                                                                                                                                                                                              |
| bays | <div style="display: flex; justify-content: space-around; align-items: flex-end;"> <div style="text-align: center;">6-6-6<br/>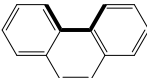</div> <div style="text-align: center;">6-5-6<br/></div> <div style="text-align: center;">6-6-5<br/></div> <div style="text-align: center;">5-6-5<br/></div> </div> |

|                    |                                                                                                                                                                                                                                                                                                                                                                                                          |
|--------------------|----------------------------------------------------------------------------------------------------------------------------------------------------------------------------------------------------------------------------------------------------------------------------------------------------------------------------------------------------------------------------------------------------------|
| A2A                | phenalene                                                                                                                                                                                                                                                                                                               |
| R5<br>(see paper)  | <sup>0</sup> R5  <sup>1</sup> R5  <sup>2</sup> R5  <sup>3</sup> R5  |
| <sup>1</sup> R5-A* |                                                                                                                                                                                                                                                                                                                         |
| <sup>2</sup> R5-A* |                                                                                                                                                                                                                                                                                                                         |
| A*1                | 1-naphthyl                                                                                                                                                                                                                                                                                                                                                                                               |
| A*2                | 2-naphthyl                                                                                                                                                                                                                                                                                                                                                                                               |

<sup>b</sup>The rate-constant values are for a pressure of 1 atm, in the units of s<sup>-1</sup> for unimolecular reactions and cm<sup>3</sup> mol<sup>-1</sup> s<sup>-1</sup> for bimolecular reactions.

<sup>c</sup>Reaction event frequency (in s<sup>-1</sup>) is calculated as the total number of reaction events occurred during a kMC simulation run, divided by the 0.01 s time interval of the run, and averaged over the number of kMC runs.

<sup>d</sup>The multiplier 0.1 accounts for the fraction of radicals of partially-embedded five-membered rings, <sup>1</sup>R5, at the conditions of the present calculations: temperature range 1400–1800 K and the flame concentrations at these temperatures of H and H<sub>2</sub>. The calculations were done using  $k_1(\text{c-C}_5\text{H}_6 \rightarrow \text{c-C}_5\text{H}_5 + \text{H}_2)$  and  $k_2(\text{c-C}_5\text{H}_6 + \text{H} \rightarrow \text{c-C}_5\text{H}_5 + \text{H}_2)$  and its reverse,  $k_{-2}$ , of Robinson and Lindstedt [26] and  $k_3(\text{c-C}_5\text{H}_5 + \text{H} \rightarrow \text{c-C}_5\text{H}_6)$  of Harding *et al.* [27]. Assuming steady-state for the c-C<sub>5</sub>H<sub>5</sub> radical and considering that  $k_{-2}[\text{H}_2]$

$\ll k_3[\text{H}]$  at the simulation conditions, we obtain that  $[\text{c-C}_5\text{H}_5]/[\text{c-C}_5\text{H}_6] \approx \frac{k_2}{k_3} \approx 0.1$ .

<sup>e</sup>The embedded migration was assumed to be in a state of partial equilibrium, ensued upon a reactant site being encountered; the product state was determined by probabilities computed from the equilibrium constants, unless the migration step forms two side-by-side five-membered rings, in which case no migration took place.

## References

1 A. S. Semikhin, A. S. Savchenkova, I. V. Chechet, S. G. Matveev, Z. Liu, M. Frenklach and A. M. Mebel, Rate constants for H abstraction from benzo(a)pyrene and chrysene: a theoretical study, *Phys. Chem. Chem. Phys.*, 2017, **19**, 25401-25413.

- 2 L. B. Harding, Y. Georgievskii and S. J. Klippenstein, Predictive theory for hydrogen atom–Hydrocarbon radical association kinetics, *J. Phys. Chem. A*, 2005, **109**, 4646-4656.
- 3 A. S. Savchenkova, I. V. Chechet, S. G. Matveev, M. Frenklach and A.M. Mebel, Formation of phenanthrenyl radicals via the reaction of acenaphthyl with acetylene, *Proc. Combust. Inst.*, 2021, **38**, 1441-1448.
- 4 M. Frenklach, R.I. Singh and A.M. Mebel, On the low-temperature limit of HACA, *Proc. Combust. Inst.*, 2019, **37**, 969-976.
- 5 L. Zhao, S. Doddipatla, R. I. Kaiser, W. Lu, O. Kostko, M. Ahmed, L. B. Tuli, A. N. Morozov, A. H. Howlader, S.F. Wnuk, A. M. Mebel, V. N. Azyazov, R. K. Mohamed and F.R. Fischer, Gas-phase synthesis of corannulene – a molecular building block of fullerenes, *Phys. Chem. Chem. Phys.*, 2021, **23**, 5740-5749.
- 6 L. Zhao, R. I. Kaiser, W. Lu, M. Ahmed, A. D. Oleinikov, V. N. Azyazov, A. M. Mebel, A. H. Howlader and S. F. Wnuk, Gas phase formation of phenalene via  $10\pi$ -aromatic, resonantly stabilized free radical intermediates, *Phys. Chem. Chem. Phys.*, 2020, **22**, 15381-15388.
- 7 V. S. Krasnoukhov, D. P. Porfiriev, I. P. Zavershinskiy, V. N. Azyazov and A. M. Mebel, Kinetics of the  $\text{CH}_3 + \text{C}_5\text{H}_5$  Reaction: A Theoretical Study, *J. Phys. Chem. A*, 2017, **121**, 9191-9200.
- 8 D. P. Porfiriev, V. N. Azyazov and A. M. Mebel, Conversion of acenaphthalene to phenalene via methylation: A theoretical study, *Combust. Flame*, 2020, **213**, 302-313.
- 9 A. S. Semenikhin, A. S. Savchenkova, I. V. Chechet, S. G. Matveev, M. Frenklach and A. M. Mebel, Transformation of an embedded five-membered ring in polycyclic aromatic hydrocarbons via the hydrogen-abstraction–acetylene-addition mechanism: A theoretical study, *J. Phys. Chem. A*, 2021, **125**, 3341-3354.
- 10 Present study.
- 11 X. You, R. Whitesides, D. Zubarev, W. A. Lester Jr. and M. Frenklach, Bay-capping reactions: kinetics and influence on graphene-edge growth, *Proc. Combust. Inst.*, 2011, **33**, 685–692.
- 12 M. Frenklach, C. A. Schuetz and J. Ping, Migration mechanism of aromatic-edge growth, *Proc. Combust. Inst.*, 2005, **30**, 1389-1396.
- 13 R. Whitesides, A. C. Kollias, D. Domin, W. A. Lester Jr. and M. Frenklach, Graphene layer growth: Collision of migrating five-member rings, *Proc. Combust. Inst.*, 2007, **31**, 539–546.
- 14 R. Whitesides, D. Domin, R. Salomón-Ferrer, W. A. Lester, Jr. and M. Frenklach, Graphene layer growth chemistry: Five- and six-member ring flip reaction, *J. Phys. Chem. A*, 2008, **112**, 2125–2130.
- 15 R. Whitesides, D. Domin, R. Salomón-Ferrer, W. A. Lester Jr. and M. Frenklach, Embedded-ring migration on graphene zigzag edge, *Proc. Combust. Inst.*, 2009, **32**, 577–583.
- 16 V. V. Kislov, R. I. Singh, D. E. Edwards, A. M. Mebel and M. Frenklach, Rate coefficients and product branching ratios for the oxidation of phenyl and naphthyl radicals: A theoretical RRKM-ME study, *Proc. Combust. Inst.*, 2015, **35**, 1861-1869.
- 17 M. Frenklach, Z. Liu, R. I. Singh, G. R. Galimova, V. N. Azyazov and A. M. Mebel, Detailed, sterically-resolved modeling of soot oxidation: Role of O atoms, interplay with particle nanostructure, and emergence of inner particle burning, *Combust. Flame*, 2018, **188**, 284-306.

- 18 D. E. Edwards, D. Y. Zubarev, W. A. Lester and M. Frenklach, Pathways to soot oxidation: Reaction of OH with phenanthrene radicals, *J. Phys. Chem. A*, 2014, **118**, 8606-8613.
- 19 D. E. Edwards, X. You, D. Y. Zubarev, W. A. Lester Jr. and M. Frenklach, Thermal decomposition of graphene armchair oxyradicals, *Proc. Combust. Inst.*, 2013, **34**, 1759–1766.
- 20 R. Meana-Paneda, D. G. Truhlar and A. Fernandez-Ramos, High-level direct-dynamics variational transition state theory calculations including multidimensional tunneling of the thermal rate constants, branching ratios, and kinetic isotope effects of the hydrogen abstraction reactions from methanol by atomic hydrogen, *J. Chem. Phys.*, 2011, **134**, 094302.
- 21 J. T. Jodkowski, M. T. Rayez and J. C. Rayez, Theoretical study of the kinetics of the hydrogen abstraction from methanol. 3. Reaction of methanol with hydrogen atom, methyl, and hydroxyl atoms, *J. Phys. Chem. A*, 1999, **103**, 3750-3765.
- 22 Y. Hidaka, T. Oki, H. Kawano and T. Higashihara, Thermal decomposition of methanol in shock waves, *J. Phys. Chem.*, 1989, **93**, 7134-7139.
- 23 A. R. Ghildina, D. P. Porfiriev, V. N. Azyazov and A. M. Mebel, The mechanism and rate constants for oxidation of indenyl radical C<sub>9</sub>H<sub>7</sub> with molecular oxygen O<sub>2</sub>: a theoretical study, *Phys. Chem. Chem. Phys.*, 2019, **21**, 8915-8924.
- 24 G. R. Galimova, V. N. Azyazov and A. M. Mebel, Reaction mechanism, rate constants, and product yields for the oxidation of cyclopentadienyl and embedded five-member ring radicals with hydroxyl, *Combust. Flame*, 2018, **187**, 147-164.
- 25 A. R. Ghildina, A. D. Oleinikov, V. N. Azyazov and A. M. Mebel, Reaction mechanism, rate constants, and product yields for unimolecular and H-assisted decomposition of 2,4-cyclopentadienone and oxidation of cyclopentadienyl with atomic oxygen, *Combust. Flame*, 2017, **183**, 181-193.
- 26 R. K. Robinson and R. P. Lindstedt, On the chemical kinetics of cyclopentadiene oxidation, *Combust. Flame*, 2011, **158**, 666-686.
- 27 L. B. Harding, S. J. Klippenstein and Y. Georgievskii, On the combination reactions of hydrogen atoms with resonance-stabilized hydrocarbon radicals, *J. Phys. Chem. A*, 2007, **111**, 3789-3801.
